# Supplementary material for: Rheostats and Toggle Switches for Modulating Protein Function
Source: PubMed Central journal article supplement (PMC3875437; doi:10.1371/journal.pone.0083502), 2013-12-30
Supplement: pone.0083502.s001.pdf [file pone.0083502.s001.pdf]

Supplemental Material for:  
Rheostats and toggle switches for modulating protein function  
File 1: Supplementary Tables

Meinhardt, Manley, Parente and Swint-Kruse

**List of Tables**

|    |                                                                              |   |
|----|------------------------------------------------------------------------------|---|
| S1 | Primers used in the construction of LGhP . . . . .                           | 2 |
| S2 | Amino acid frequency in the linker positions of the LacI subfamily . . . . . | 3 |

Table S1: Primers used in the construction of LGhP

| Name          | Sequence                          |
|---------------|-----------------------------------|
| LhG-NL        | GCGGCGATGGCGGAGCTCAGTTACCATCCCAAC |
| rev LhG-NL    | GTTGGGATGGTAACTGAGCTCCGCCATCGCCGC |
| LhG-Hhalf     | CCCAACCCCGAGGCACGAGAACTGGCG       |
| rev LhG-Hhalf | CGCCAGTTCTCGTGCCTCGGGGTTGGG       |
| LhG-Hfull     | CCCAACGCCAACGCACGAGCACTGGCG       |
| rev LhG-Hfull | CGCCAGTGCTCGTGCCTGGCGTTGGG        |
| LGhPChalffor  | CAACTGGCGCGCCAAAAGACGAAATCTATCGG  |
| LGhPChalfrev  | CCGATAGATTTTCGTCTTTTGGCGCGCCAGTTG |
| GhPCLFor      | CAACTGGCGCAACAAACCACGAAATCTATCGG  |
| GhPCLRev      | CCGATAGATTTTCGTGGTTTGTGGCGCCAGTTG |
| Gh-Fix1       | GAACGCCAACGCCCGTGCCTGGCGC         |
| rev Gh-Fix1   | GCGCCAGCGCACGGCGTTGGCGTTC         |
| GhP-Fix2      | CTGGCGCAGCAGACCACTAAATCTATCG      |
| rev GhP-Fix2  | CGATAGATTTAGTGGTCTGCTGCGCCAG      |

Table S2: Amino acid frequency (%) in the linker positions of the LacI subfamily.

|     | 45  | 46 | 47  | 48 | 49 | 50  | 51 | 52 | 53  | 54  | 55 | 56  | 57 | 58 | 59 | 60 | 61 | 62 |
|-----|-----|----|-----|----|----|-----|----|----|-----|-----|----|-----|----|----|----|----|----|----|
| A   |     |    |     |    |    |     |    | 1  | 100 |     |    |     | 88 |    |    | 9  | 13 |    |
| C   |     |    |     |    |    |     |    |    |     |     |    |     |    |    |    |    |    |    |
| D   |     |    |     |    |    |     |    |    |     |     |    |     |    |    |    |    |    | 1  |
| E   |     |    |     |    |    |     |    |    |     |     |    |     |    |    |    |    |    |    |
| F   |     |    |     |    |    |     |    |    |     |     |    |     |    |    |    |    |    |    |
| G   |     |    |     |    |    |     |    | 3  |     |     |    |     |    | 95 |    |    |    |    |
| H   |     | 17 |     |    |    |     | 1  |    |     |     |    |     |    |    |    | 12 |    |    |
| I   |     |    |     |    |    |     |    | 1  |     |     | 1  |     |    |    |    |    | 6  |    |
| K   |     |    |     | 55 |    |     |    |    |     |     | 1  |     |    |    |    |    |    |    |
| L   | 100 |    |     |    |    |     |    | 12 |     |     | 9  | 100 |    |    |    |    | 1  | 53 |
| M   |     |    |     |    |    |     |    |    |     |     |    |     |    |    |    |    |    | 9  |
| N   |     | 70 |     |    |    | 100 |    |    |     |     |    |     |    |    |    |    |    |    |
| P   |     |    |     |    |    |     |    |    |     |     |    |     |    |    |    |    | 1  | 16 |
| Q   |     |    |     |    |    |     |    |    |     | 100 | 90 |     |    |    |    | 61 |    | 1  |
| R   |     | 12 |     |    |    |     | 99 |    |     |     |    |     |    | 5  | 5  | 5  |    | 5  |
| S   |     | 1  |     |    |    |     |    | 10 |     |     |    |     |    |    |    | 5  | 69 | 1  |
| T   |     |    |     | 6  |    |     |    |    |     |     |    |     |    |    |    | 8  | 8  | 12 |
| V   |     |    |     | 38 |    |     |    | 73 |     |     |    |     | 12 |    |    |    | 1  |    |
| W   |     |    |     |    |    |     |    |    |     |     |    |     |    |    |    |    |    |    |
| Y   |     |    |     |    |    |     |    |    |     |     |    |     |    |    |    |    |    |    |
| GAP |     |    | 100 | 1  |    |     |    |    |     |     |    |     |    |    |    |    |    | 1  |
