# Supplementary material for: Rheostats and Toggle Switches for Modulating Protein Function
Source: PubMed Central journal article supplement (PMC3875437; doi:10.1371/journal.pone.0083502), 2013-12-30
Supplement: pone.0083502.s005.pdf [file pone.0083502.s005.pdf]

Supplemental Material for:  
Rheostats and toggle switches for modulating protein function  
File 5: Physicochemical trends: Positions 46-54

Meinhardt, Manley, Parente and Swint-Kruse

**List of Figures**

|     |                                                                                    |    |
|-----|------------------------------------------------------------------------------------|----|
| S25 | Physicochemical trends: Position 46, Accessible surface area . . . . .             | 3  |
| S26 | Physicochemical trends: Position 46, Side chain branching . . . . .                | 4  |
| S27 | Physicochemical trends: Position 46, Charge/polarity/aromaticity . . . . .         | 5  |
| S28 | Physicochemical trends: Position 46, Hydrophobicity . . . . .                      | 6  |
| S29 | Physicochemical trends: Position 48, Accessible surface area . . . . .             | 7  |
| S30 | Physicochemical trends: Position 48, Side chain branching . . . . .                | 8  |
| S31 | Physicochemical trends: Position 48, Charge/polarity/aromaticity . . . . .         | 9  |
| S32 | Physicochemical trends: Position 48, Helical propensity (N' scale) . . . . .       | 10 |
| S33 | Physicochemical trends: Position 48, Hydrophobicity . . . . .                      | 11 |
| S34 | Physicochemical trends: Position 50, Accessible surface area . . . . .             | 12 |
| S35 | Physicochemical trends: Position 50, Side chain branching . . . . .                | 13 |
| S36 | Physicochemical trends: Position 50, Charge/polarity/aromaticity . . . . .         | 14 |
| S37 | Physicochemical trends: Position 50, Helical propensity (N1 scale) . . . . .       | 15 |
| S38 | Physicochemical trends: Position 50, Hydrophobicity . . . . .                      | 16 |
| S39 | Physicochemical trends: Position 51, Accessible surface area . . . . .             | 17 |
| S40 | Physicochemical trends: Position 51, Side chain branching . . . . .                | 18 |
| S41 | Physicochemical trends: Position 51, Charge/polarity/aromaticity . . . . .         | 19 |
| S42 | Physicochemical trends: Position 51, Helical propensity (N2 scale) . . . . .       | 20 |
| S43 | Physicochemical trends: Position 51, Hydrophobicity . . . . .                      | 21 |
| S44 | Physicochemical trends: Position 52, Accessible surface area . . . . .             | 22 |
| S45 | Physicochemical trends: Position 52, Side chain branching . . . . .                | 23 |
| S46 | Physicochemical trends: Position 52, Charge/polarity/aromaticity . . . . .         | 24 |
| S47 | Physicochemical trends: Position 52, Helical propensity (N3 scale) . . . . .       | 25 |
| S48 | Physicochemical trends: Position 52, Hydrophobicity . . . . .                      | 26 |
| S49 | Physicochemical trends: Position 54, Accessible surface area . . . . .             | 27 |
| S50 | Physicochemical trends: Position 54, Side chain branching . . . . .                | 28 |
| S51 | Physicochemical trends: Position 54, Charge/polarity/aromaticity . . . . .         | 29 |
| S52 | Physicochemical trends: Position 54, Helical propensity (C4 scale) . . . . .       | 30 |
| S53 | Physicochemical trends: Position 54, Helical propensity (Midpoint scale) . . . . . | 31 |
| S54 | Physicochemical trends: Position 54, Hydrophobicity . . . . .                      | 32 |

**Figures S25-S54.** Physico-chemical trends: positions 46-54. Repression assay data for each position were color-coded according to various physico-chemical scales. For example, Figures S25-S28 show results for position 46 color-coded by accessible surface area of the free side chain [46], side chain branching, charge/polarity/aromaticity, and hydrophobicity [45]. The relevant parameter can be determined from the legend in the lower right hand corner of each graph. Positions 50-58 have potential to participate in an alpha helix, and repression assay results were also compared to both average and position-specific helical propensities [47]. For simplicity, only one helix color scale is used as a legend, with magenta corresponding to high propensity and green corresponding to low propensity. Since wild-type LacI and PurR have different length helices [20], we compared multiple helical scales to results for each position. However, no scale showed good correlation with the functional assay among all chimeras.

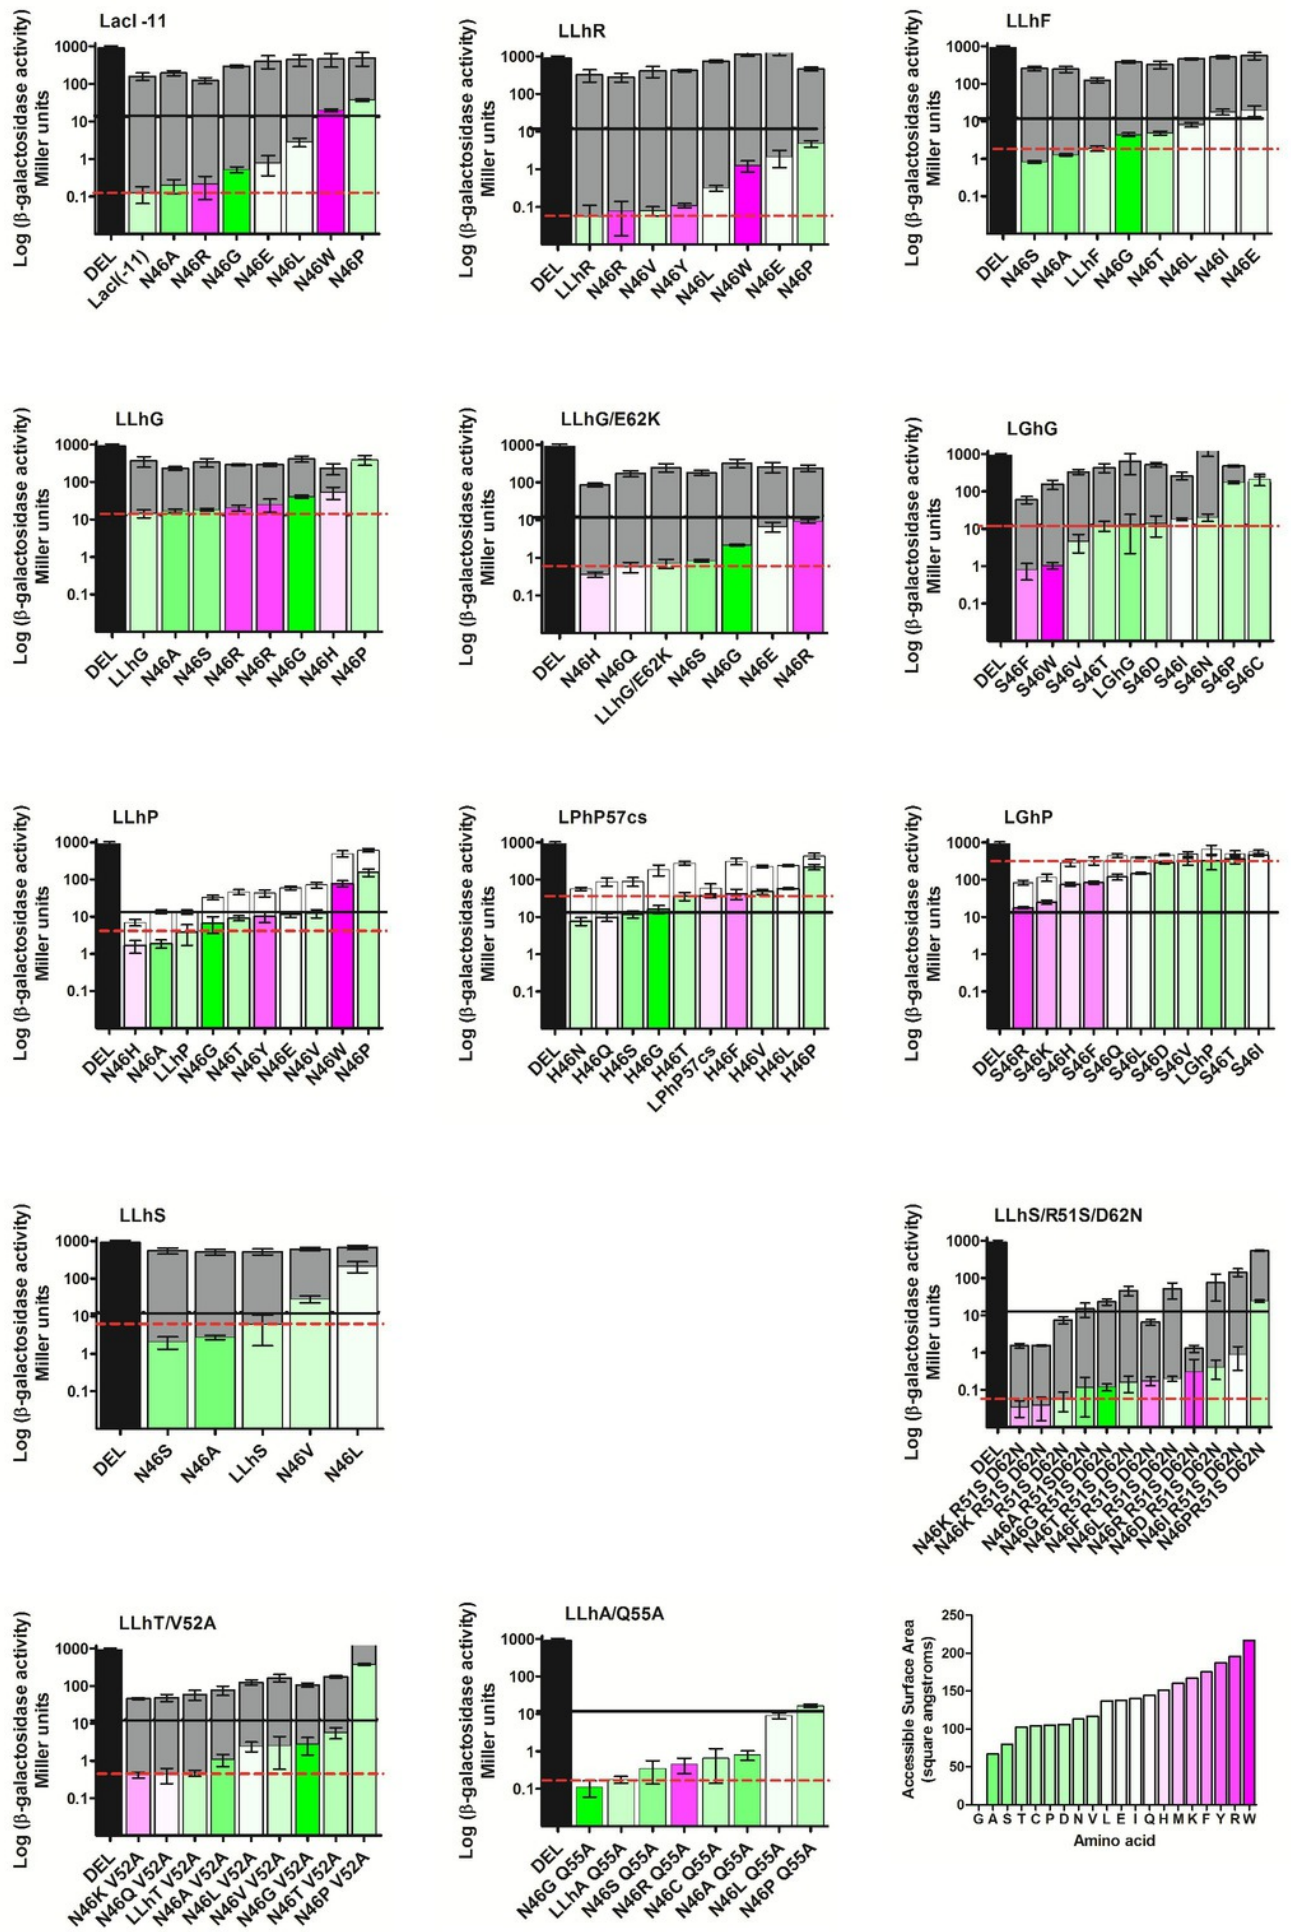

Figure S25: Physicochemical trends: Position 46, Accessible surface area

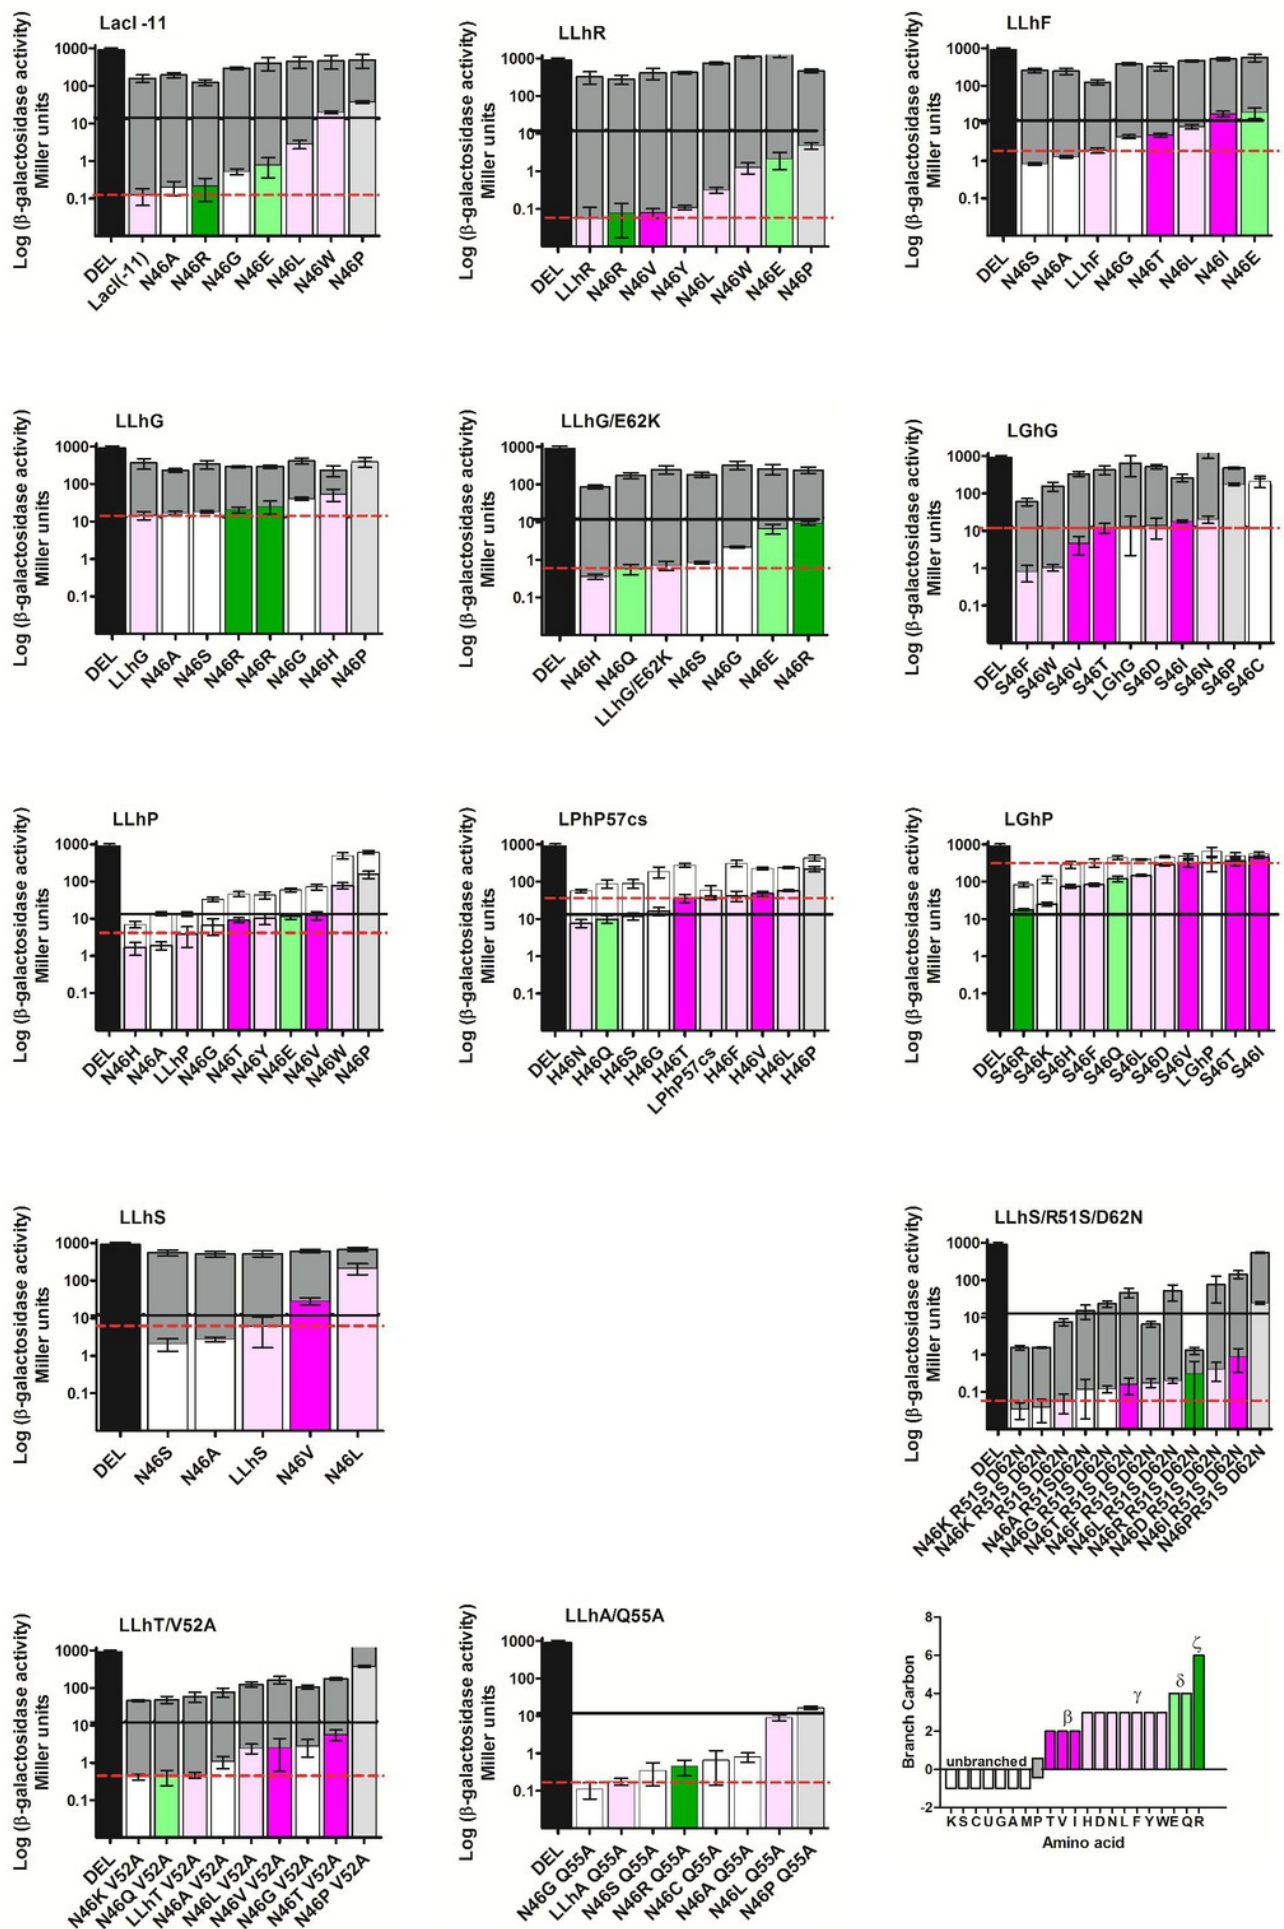

Figure S26: Physicochemical trends: Position 46, Side chain branching



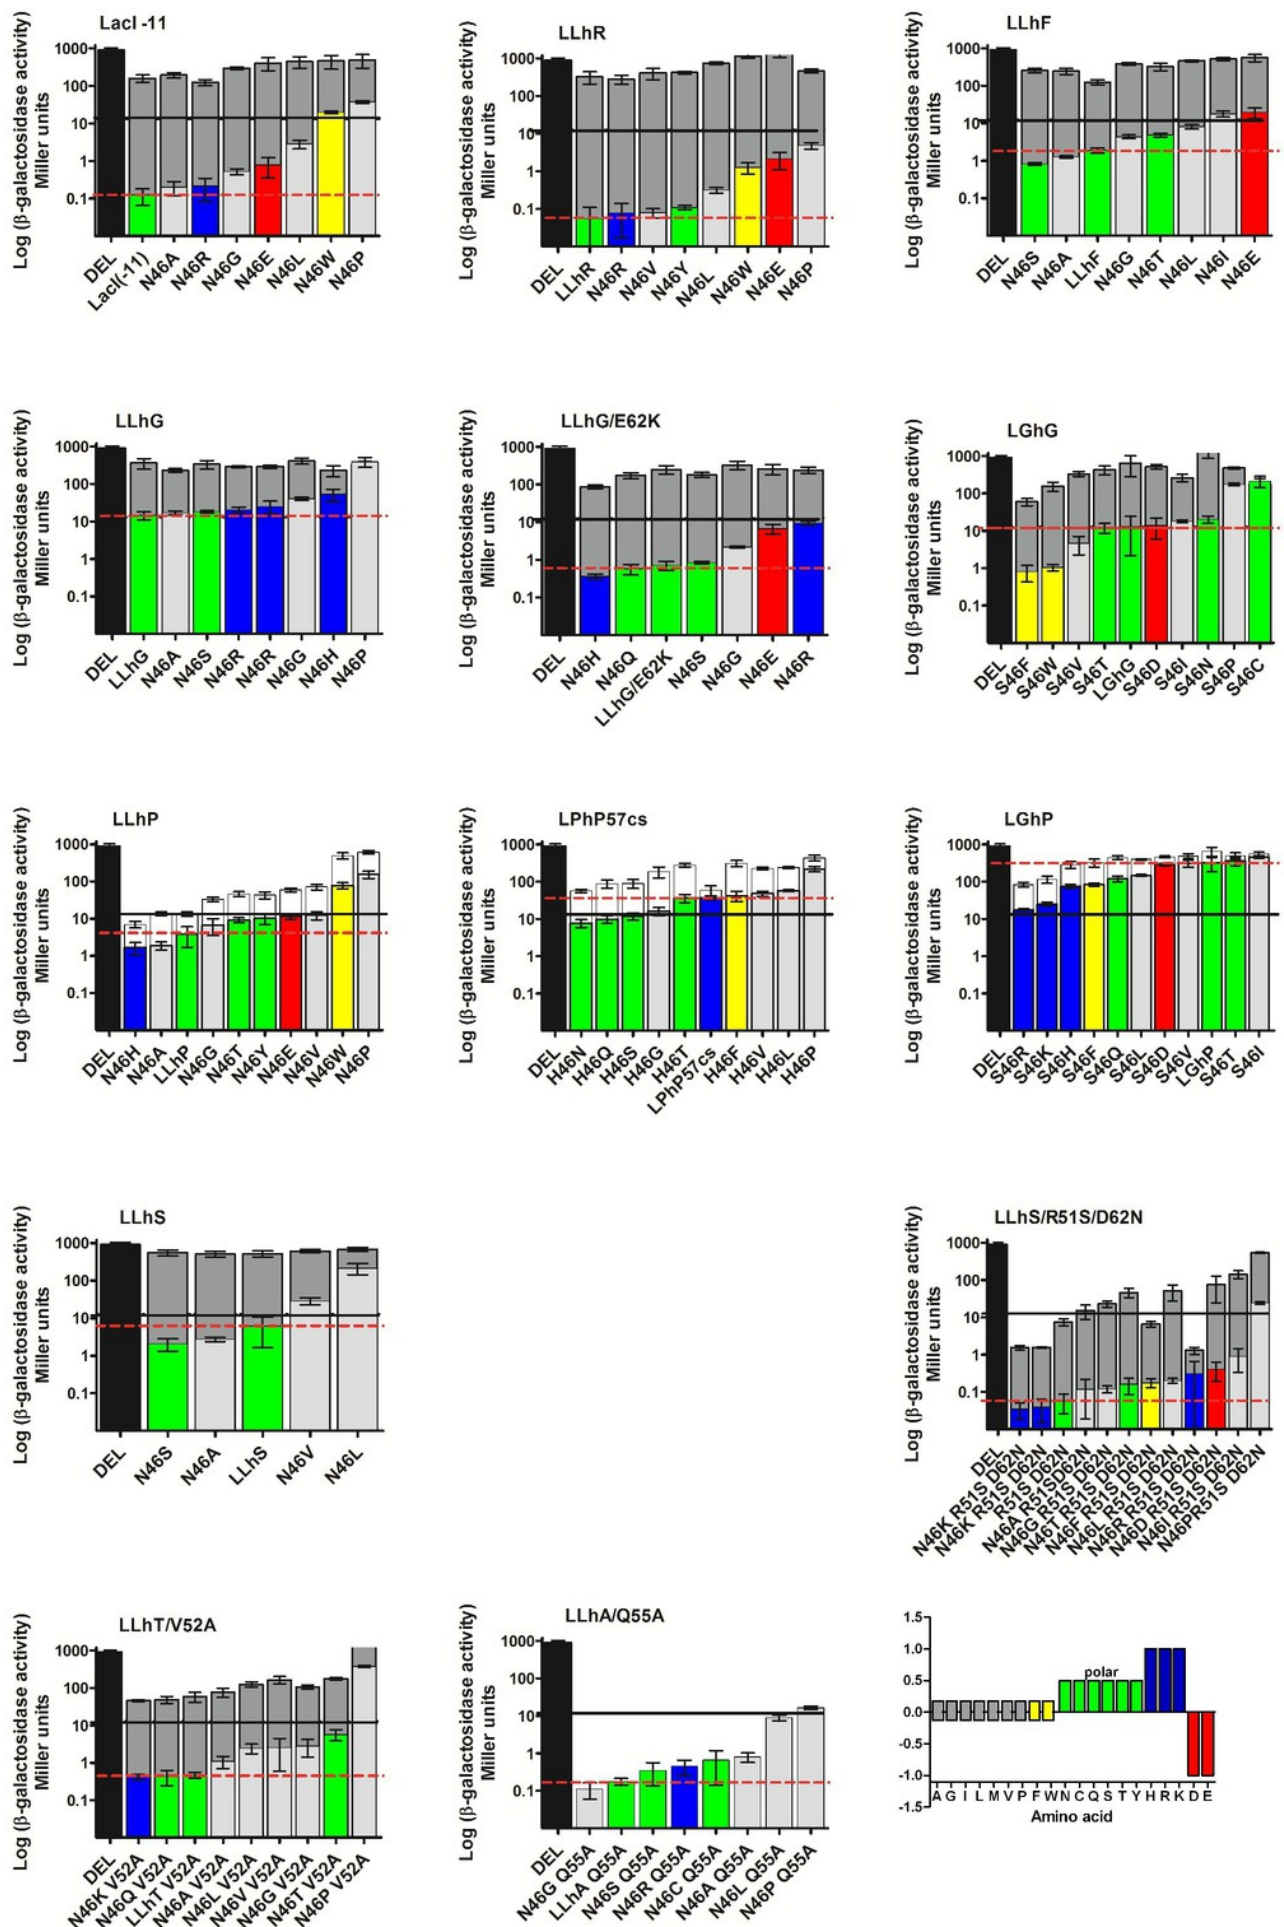

Figure S27: Physicochemical trends: Position 46, Charge/polarity/aromaticity

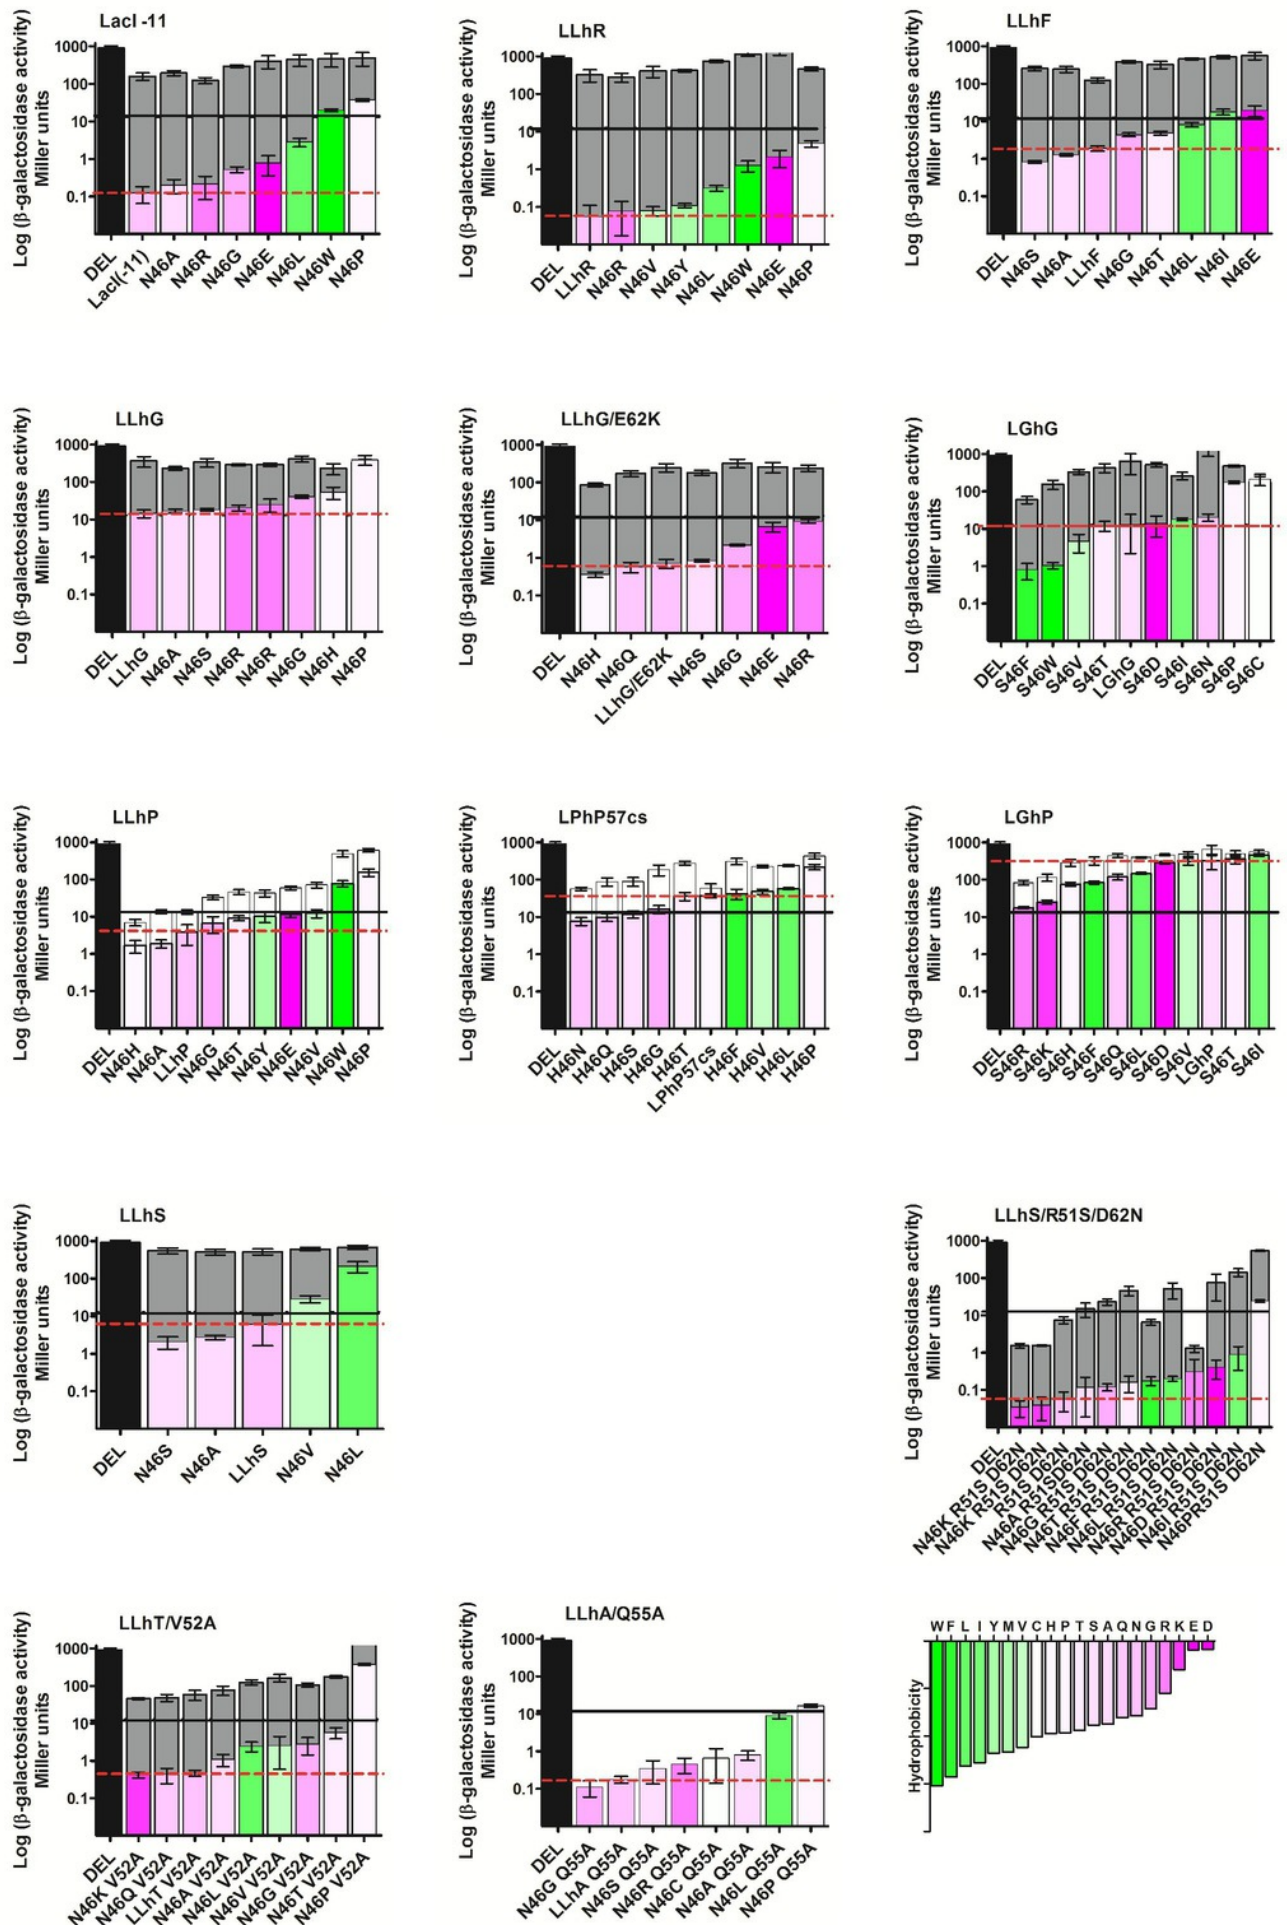

Figure S28: Physicochemical trends: Position 46, Hydrophobicity



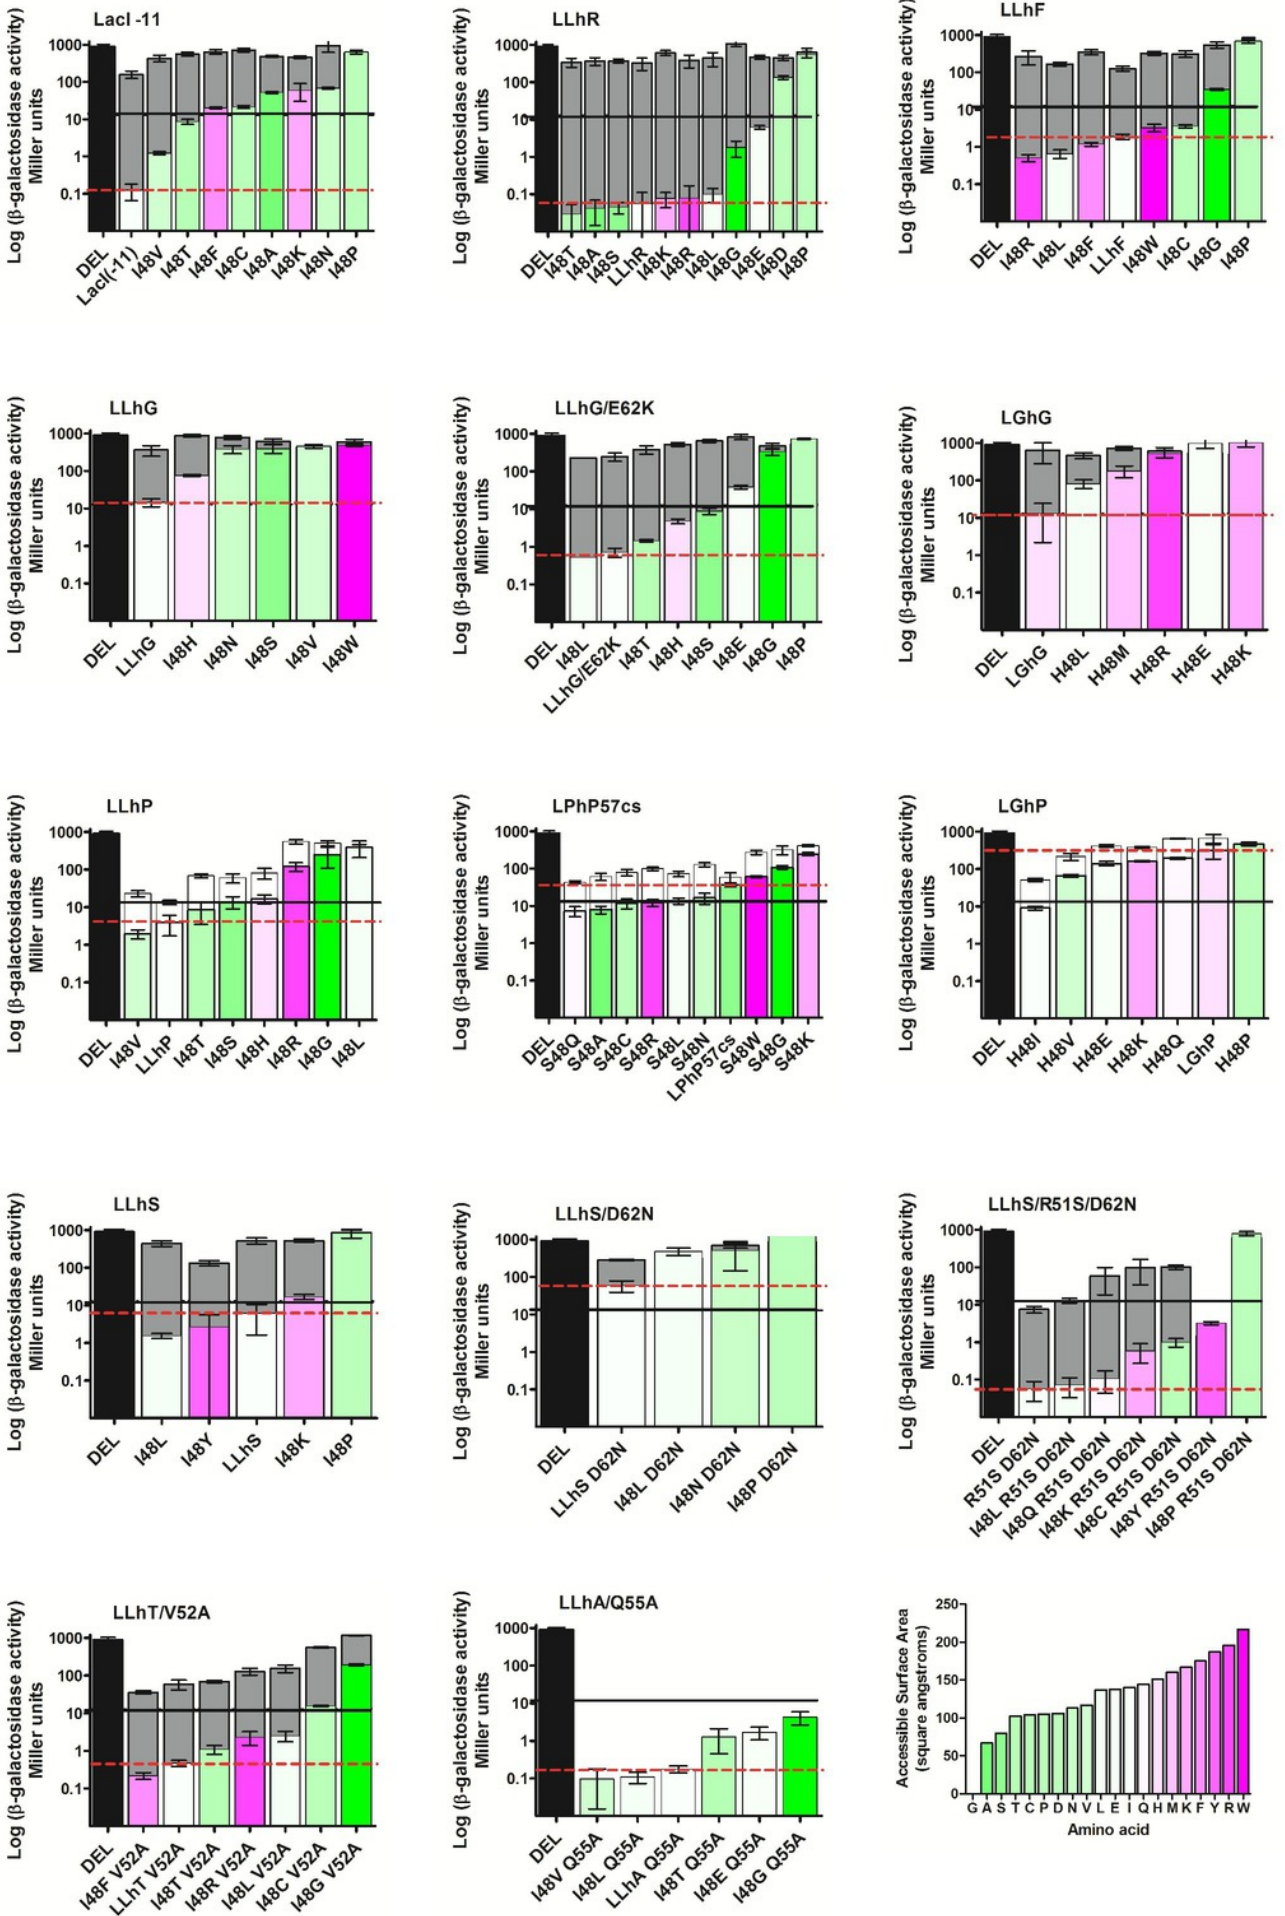

Figure S29: Physicochemical trends: Position 48, Accessible surface area

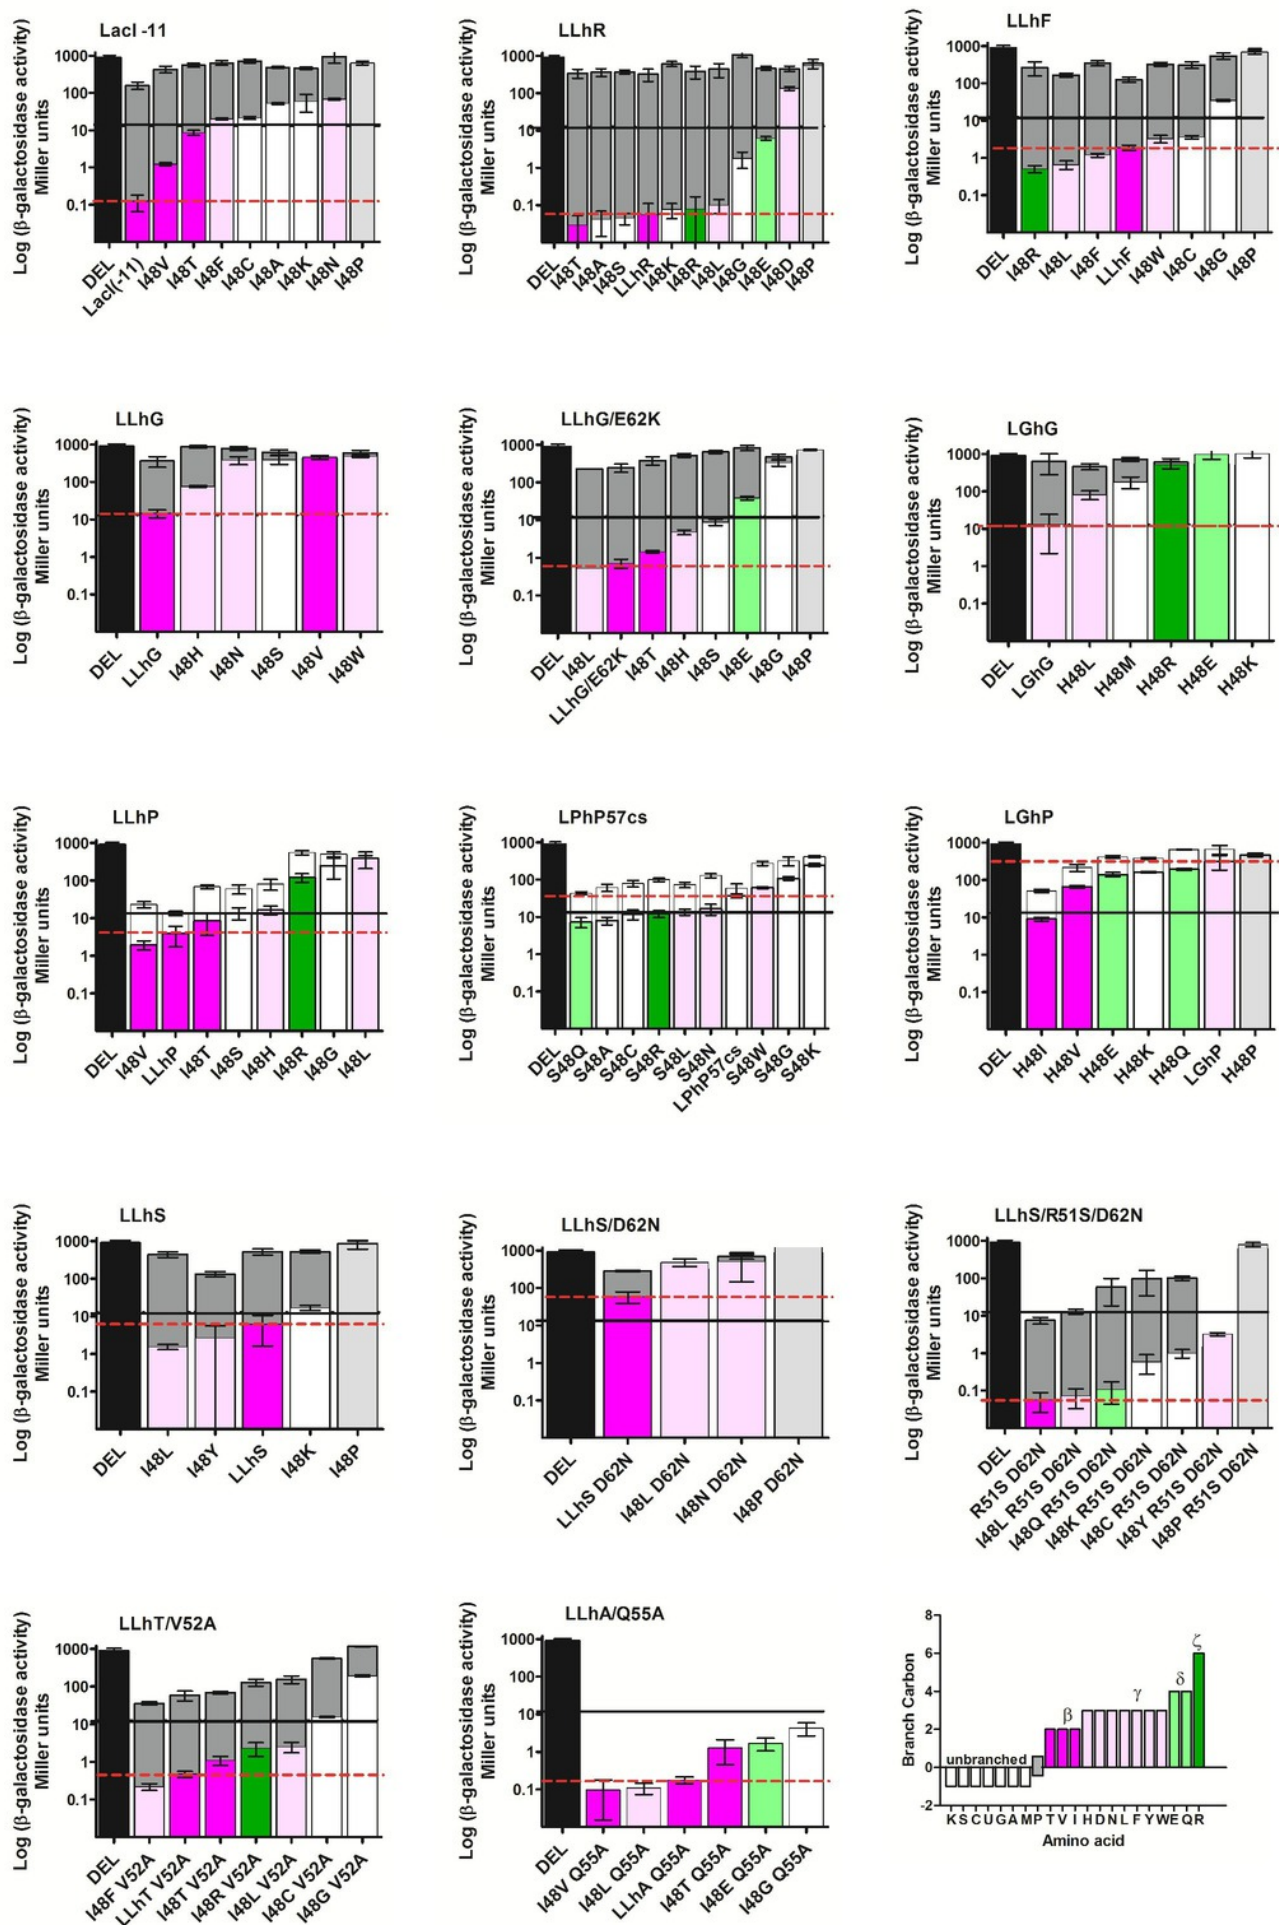

Figure S30: Physicochemical trends: Position 48, Side chain branching



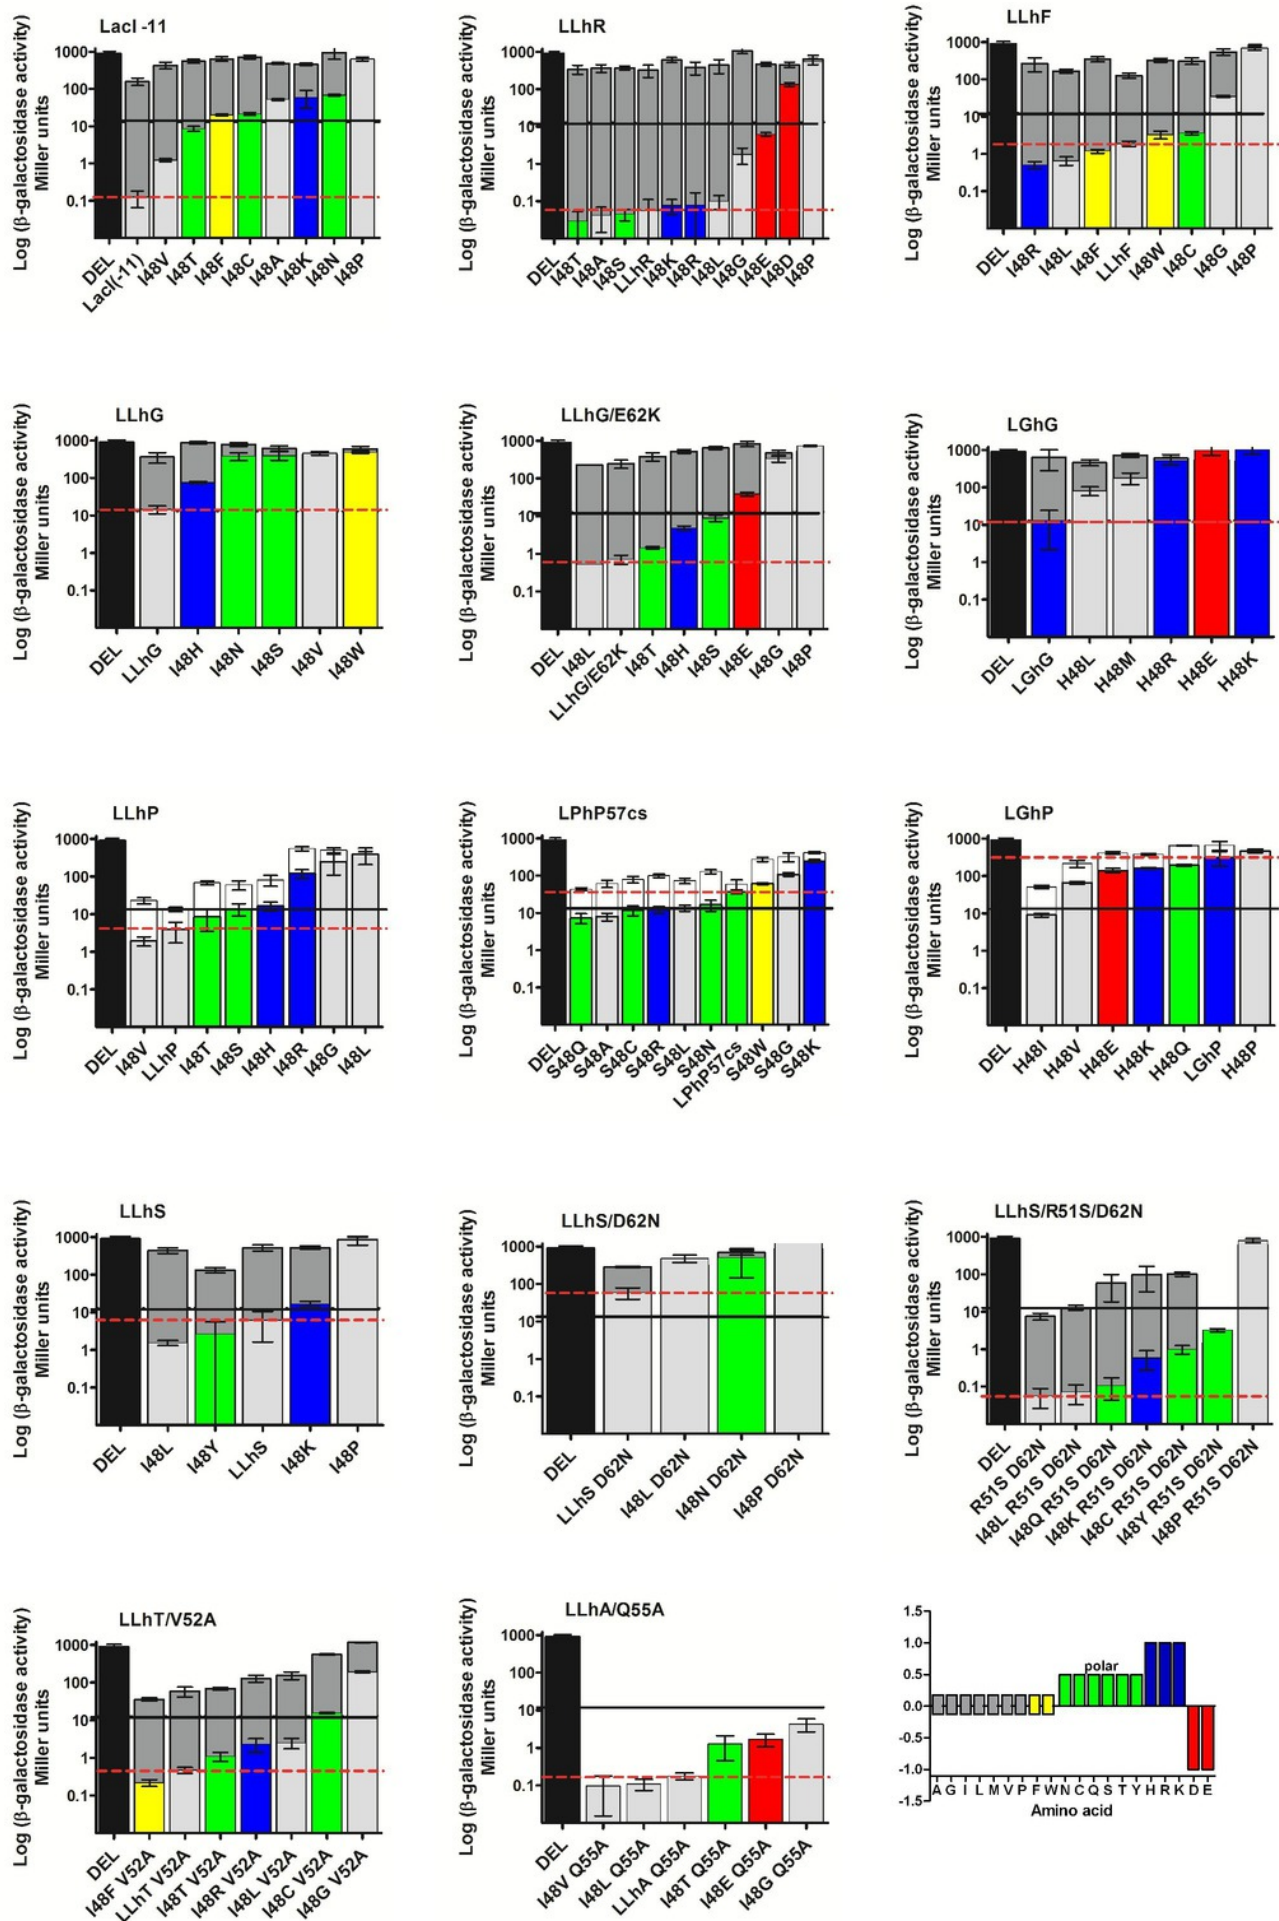

Figure S31: Physicochemical trends: Position 48, Charge/polarity/aromaticity



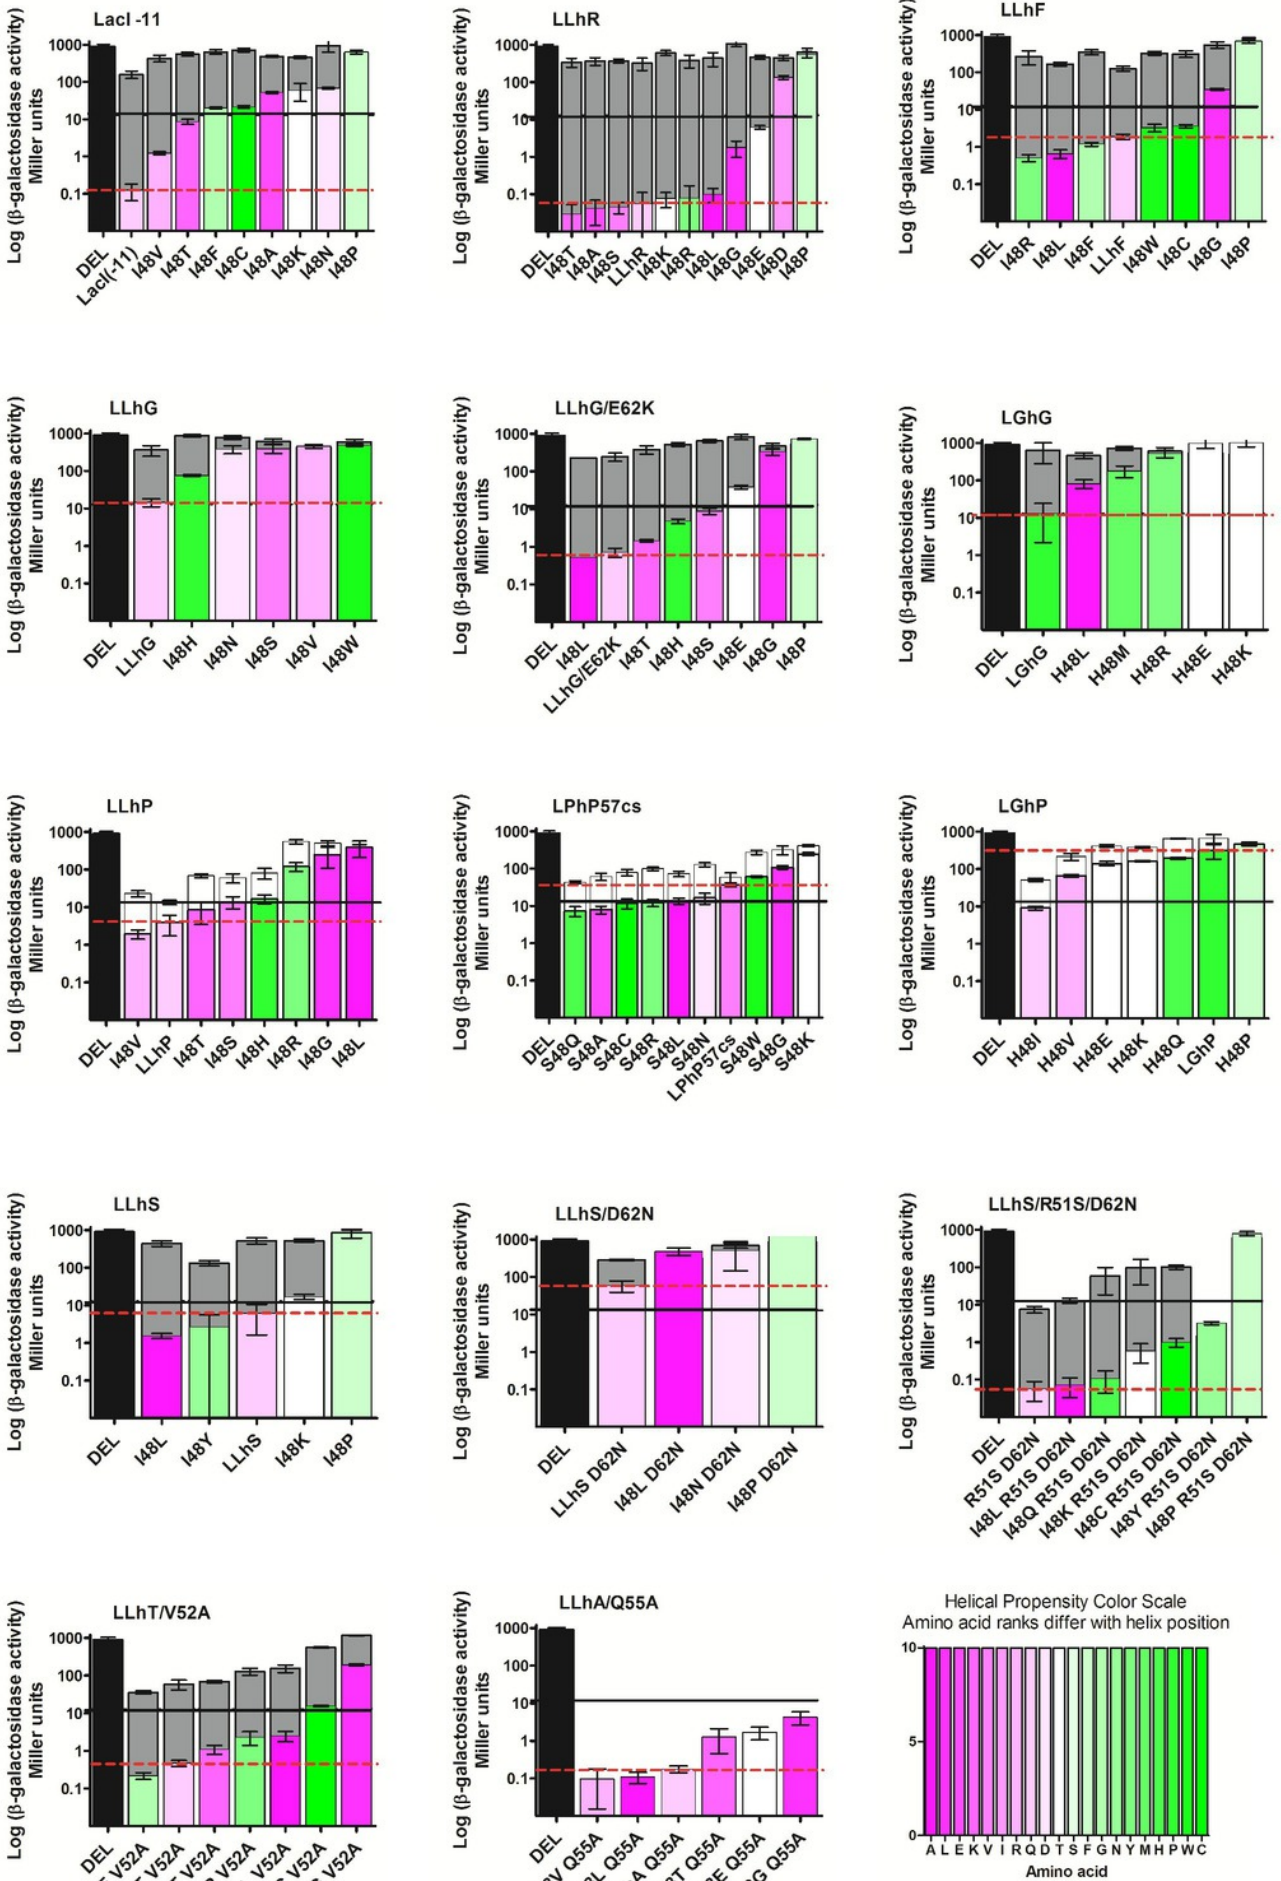

Figure S32: Physicochemical trends: Position 48, Helical propensity (N' scale)

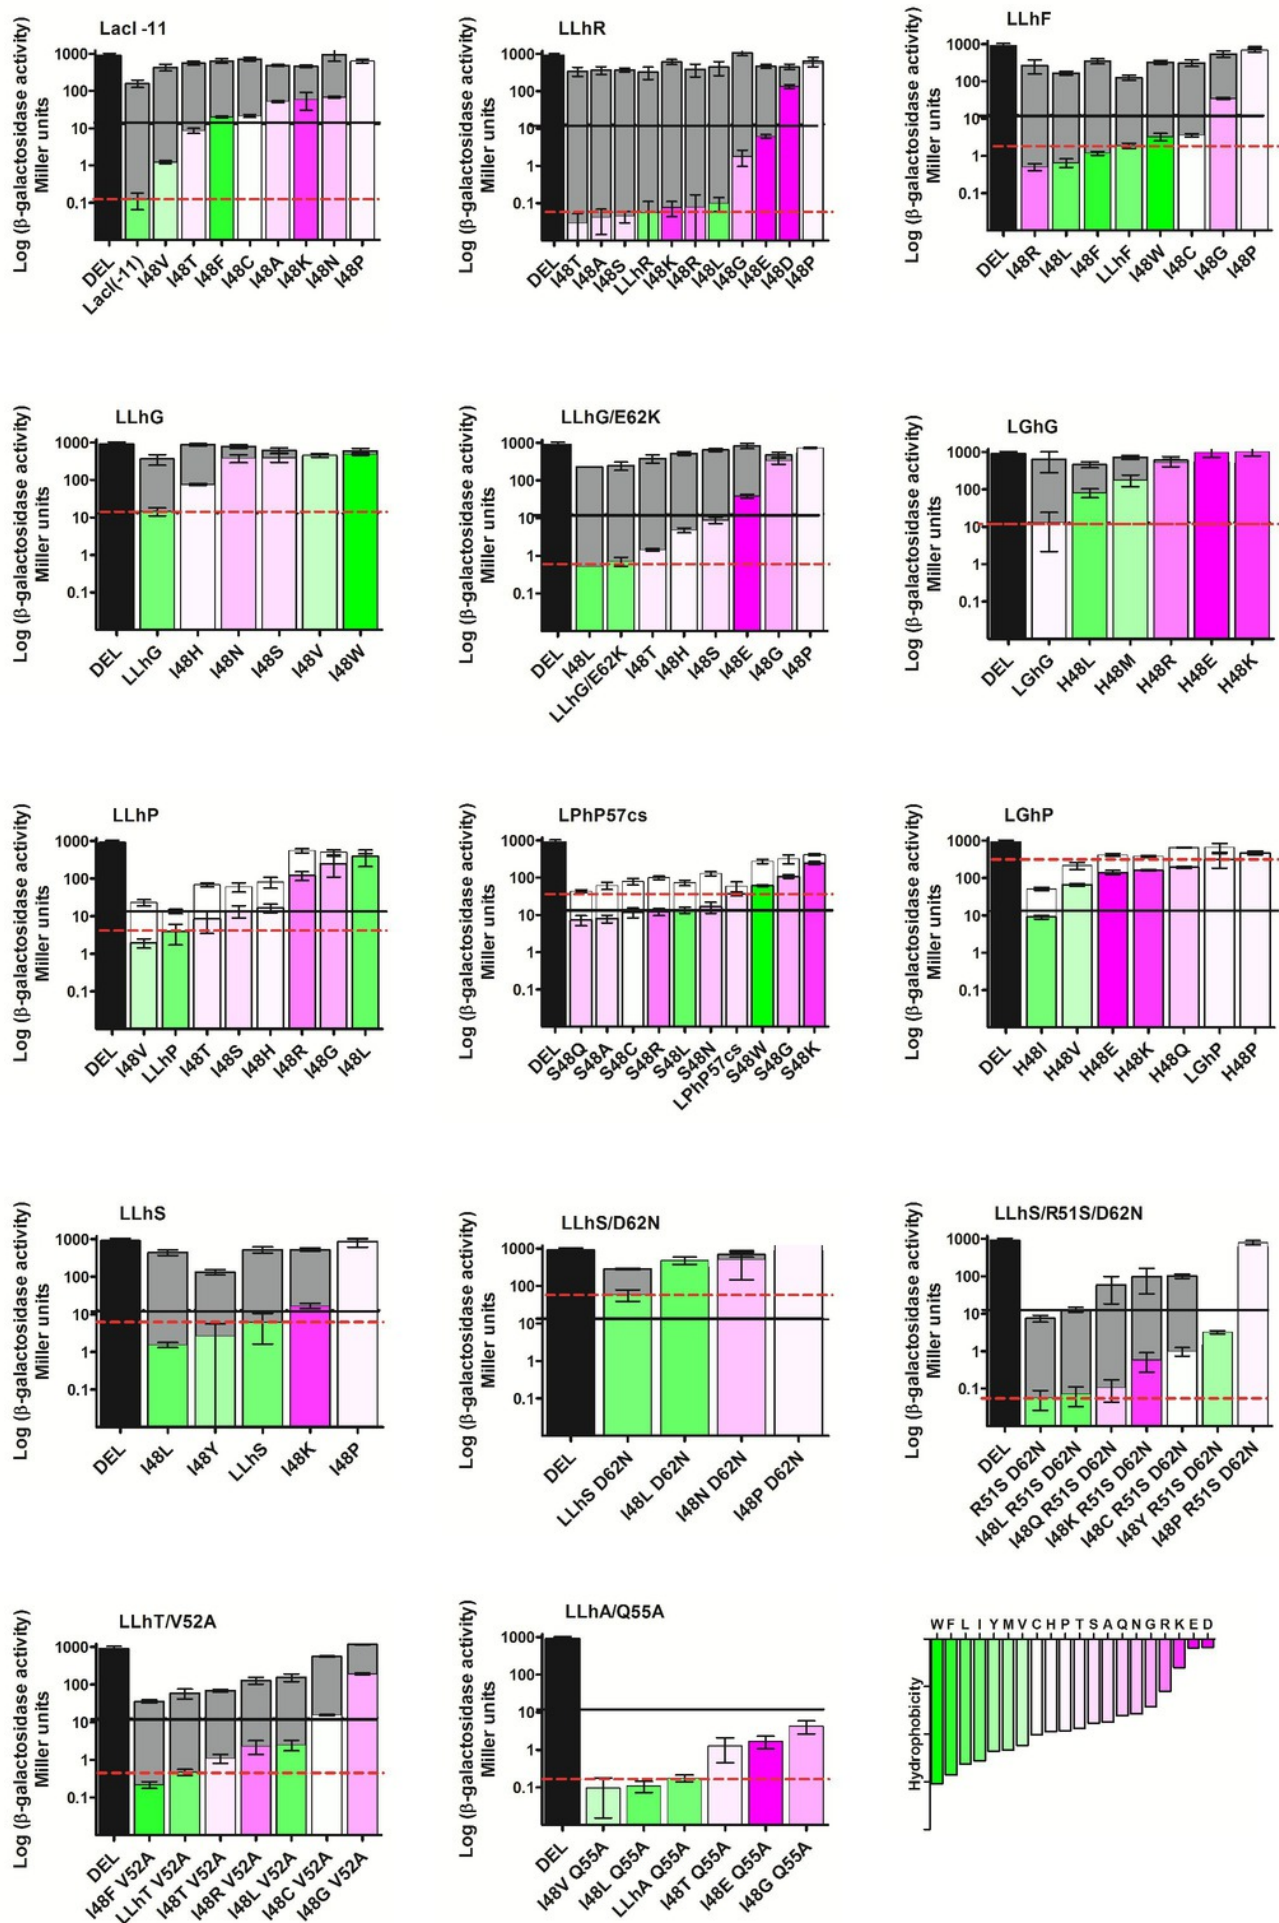

Figure S33: Physicochemical trends: Position 48, Hydrophobicity



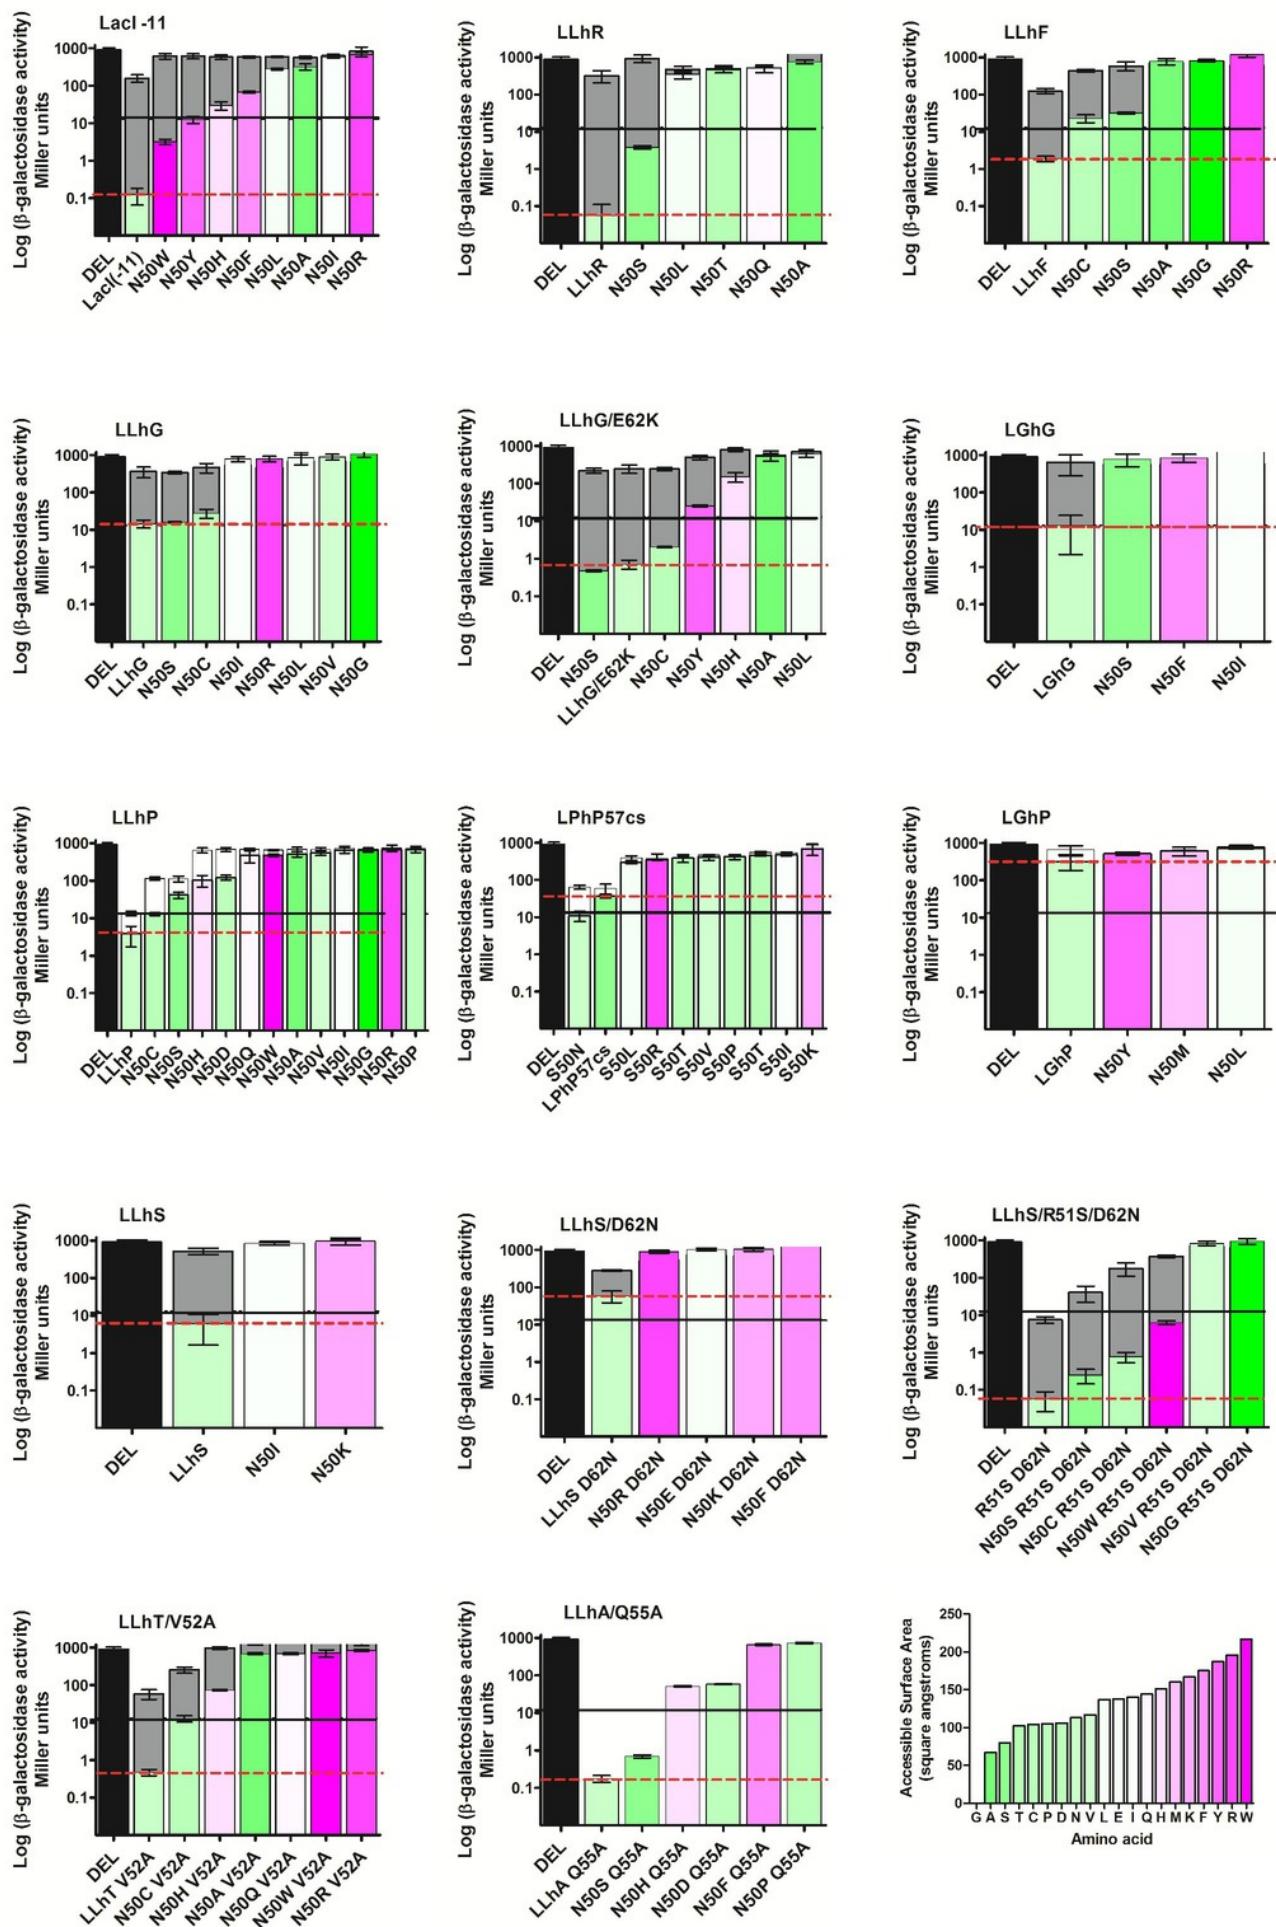

Figure S34: Physicochemical trends: Position 50, Accessible surface area

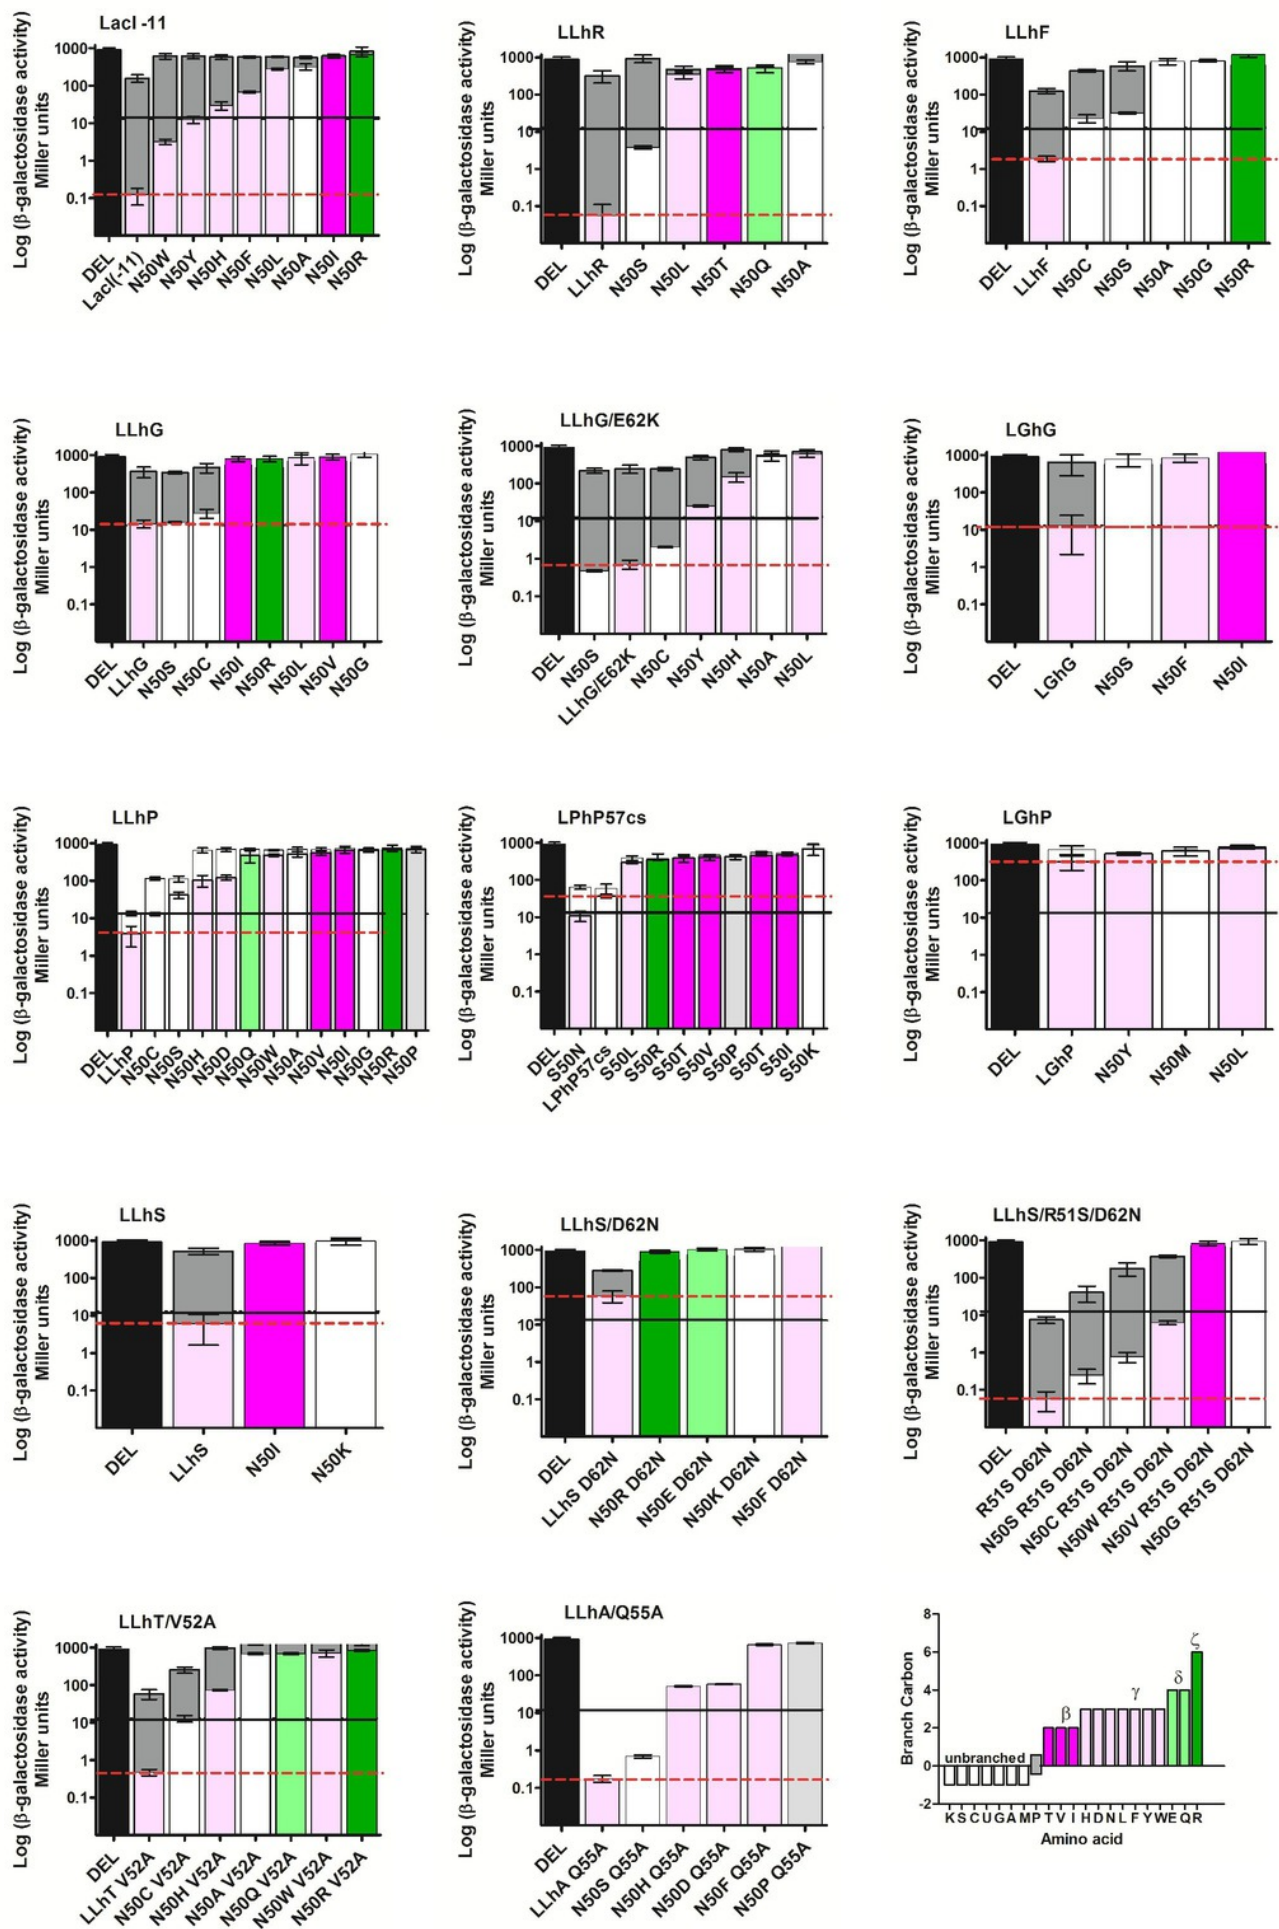

Figure S35: Physicochemical trends: Position 50, Side chain branching



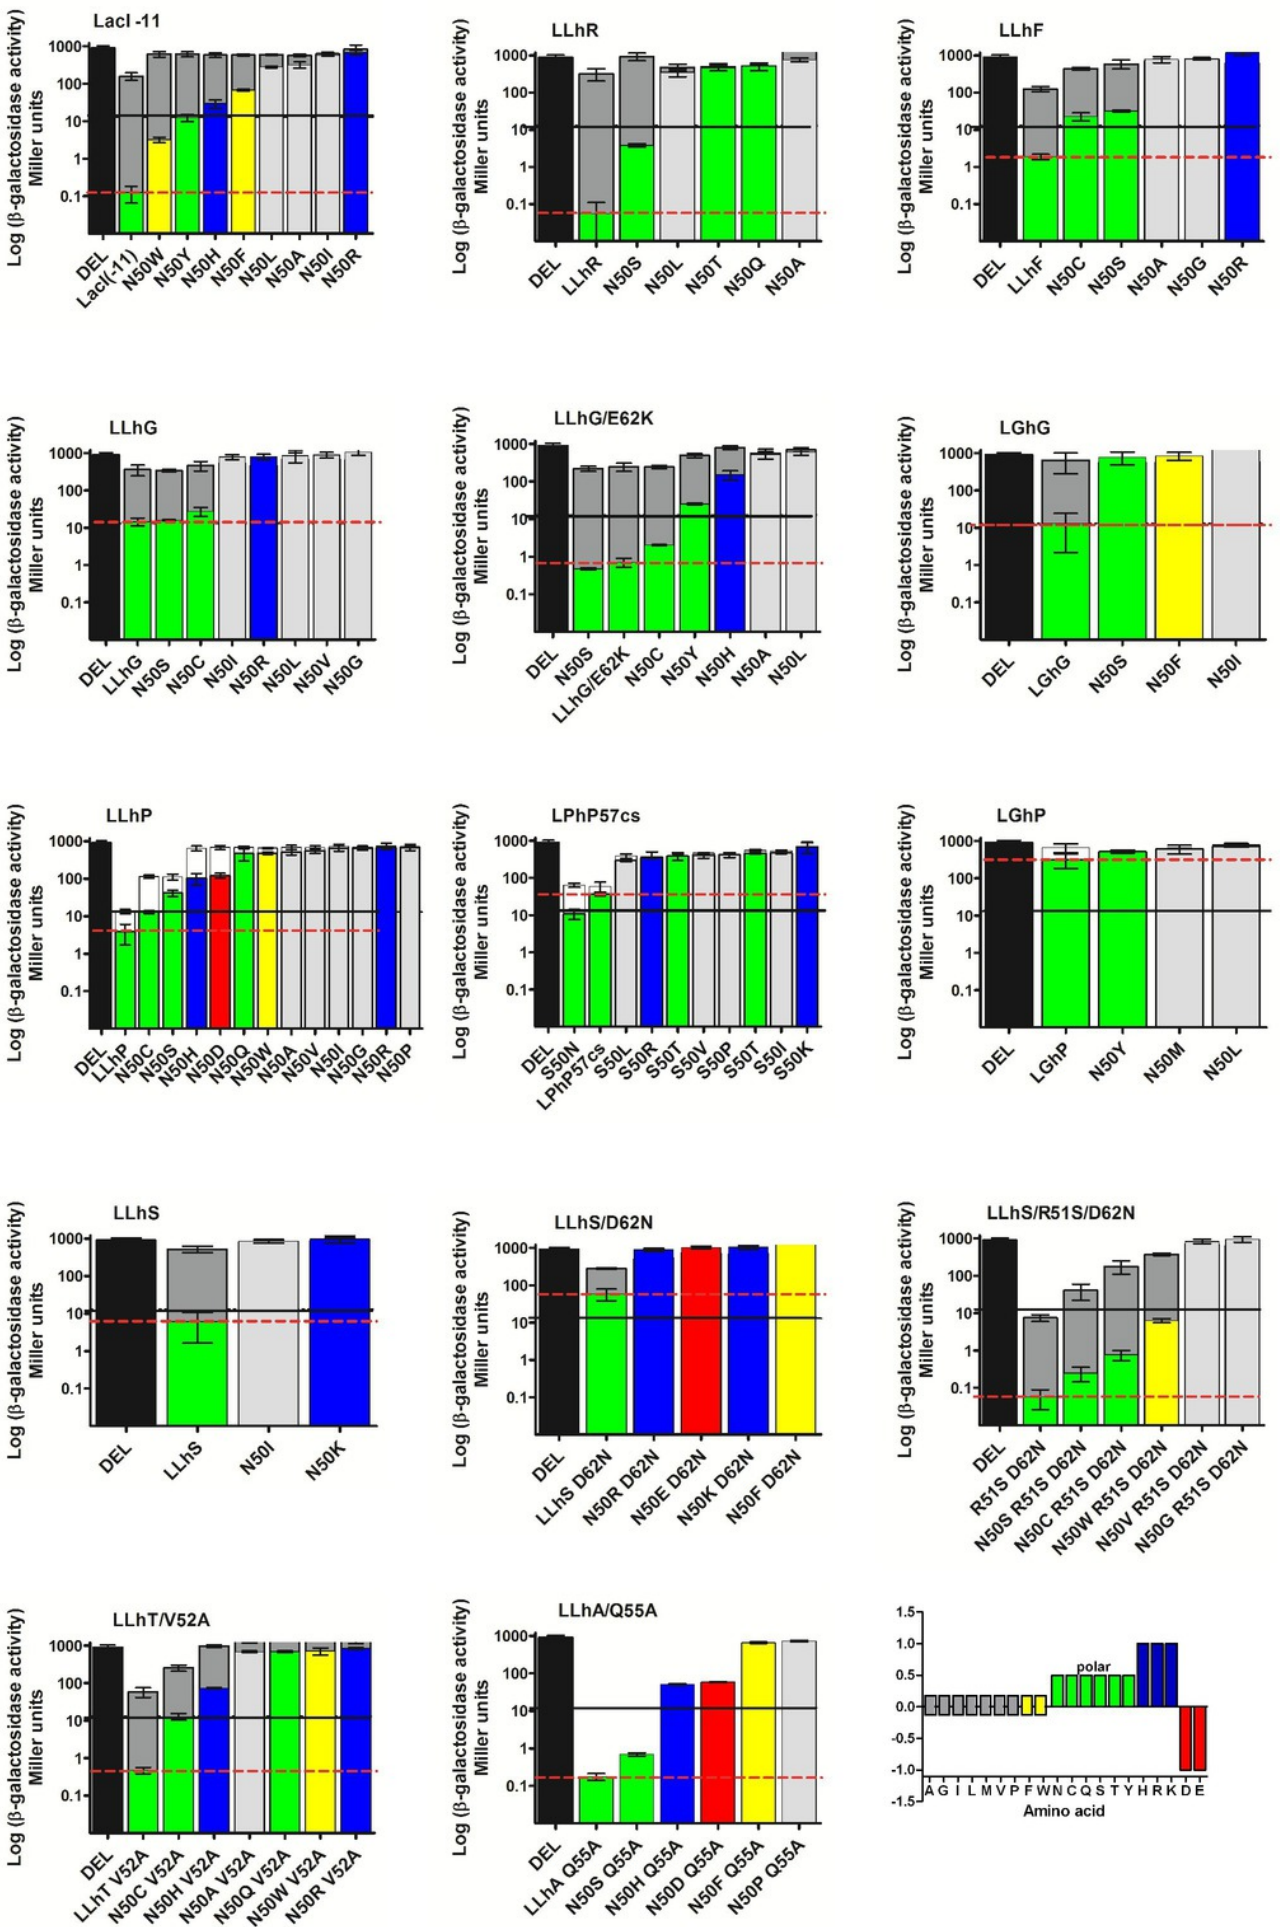

Figure S36: Physicochemical trends: Position 50, Charge/polarity/aromaticity



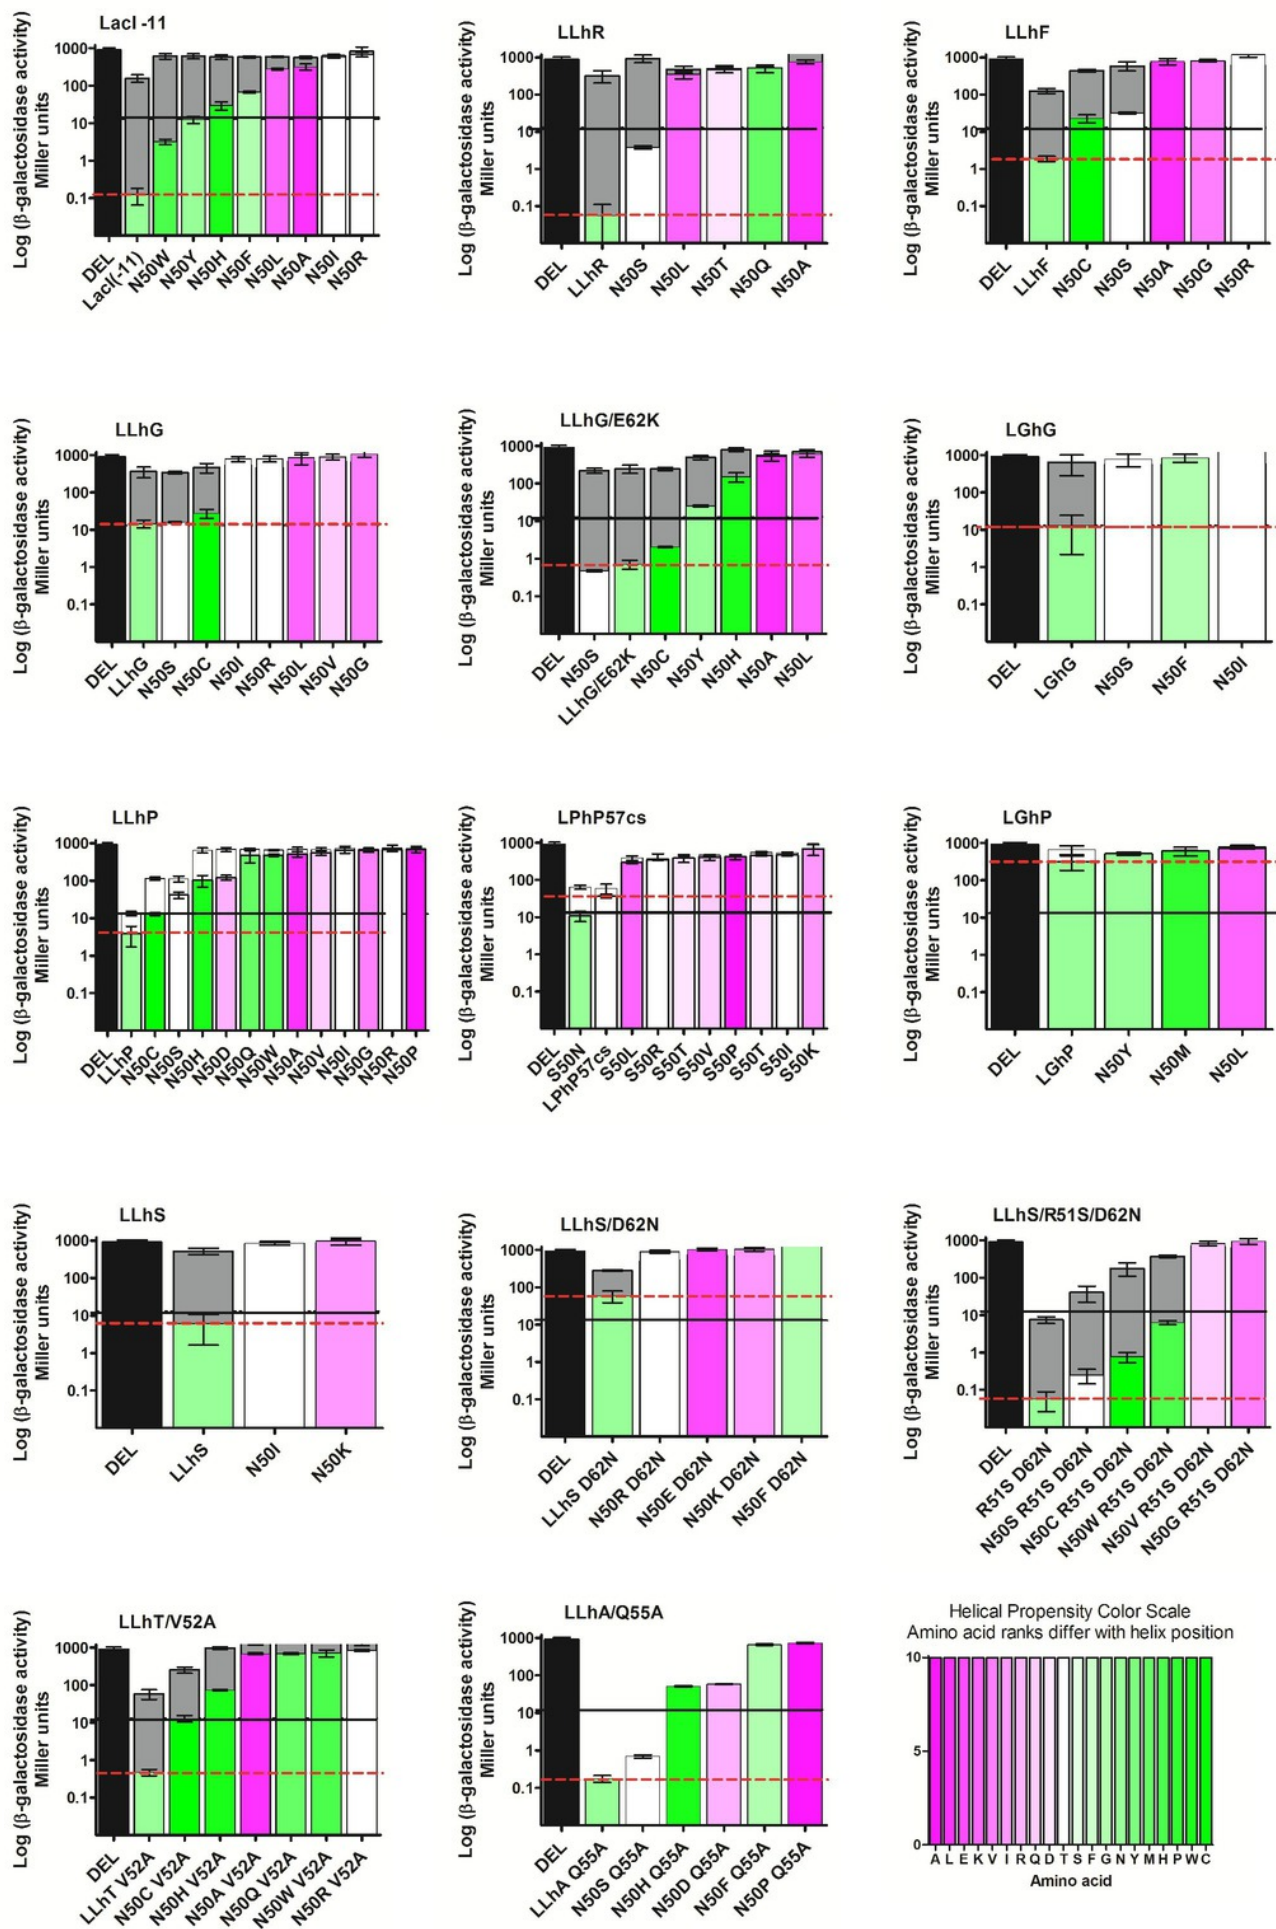

Figure S37: Physicochemical trends: Position 50, Helical propensity (N1 scale)

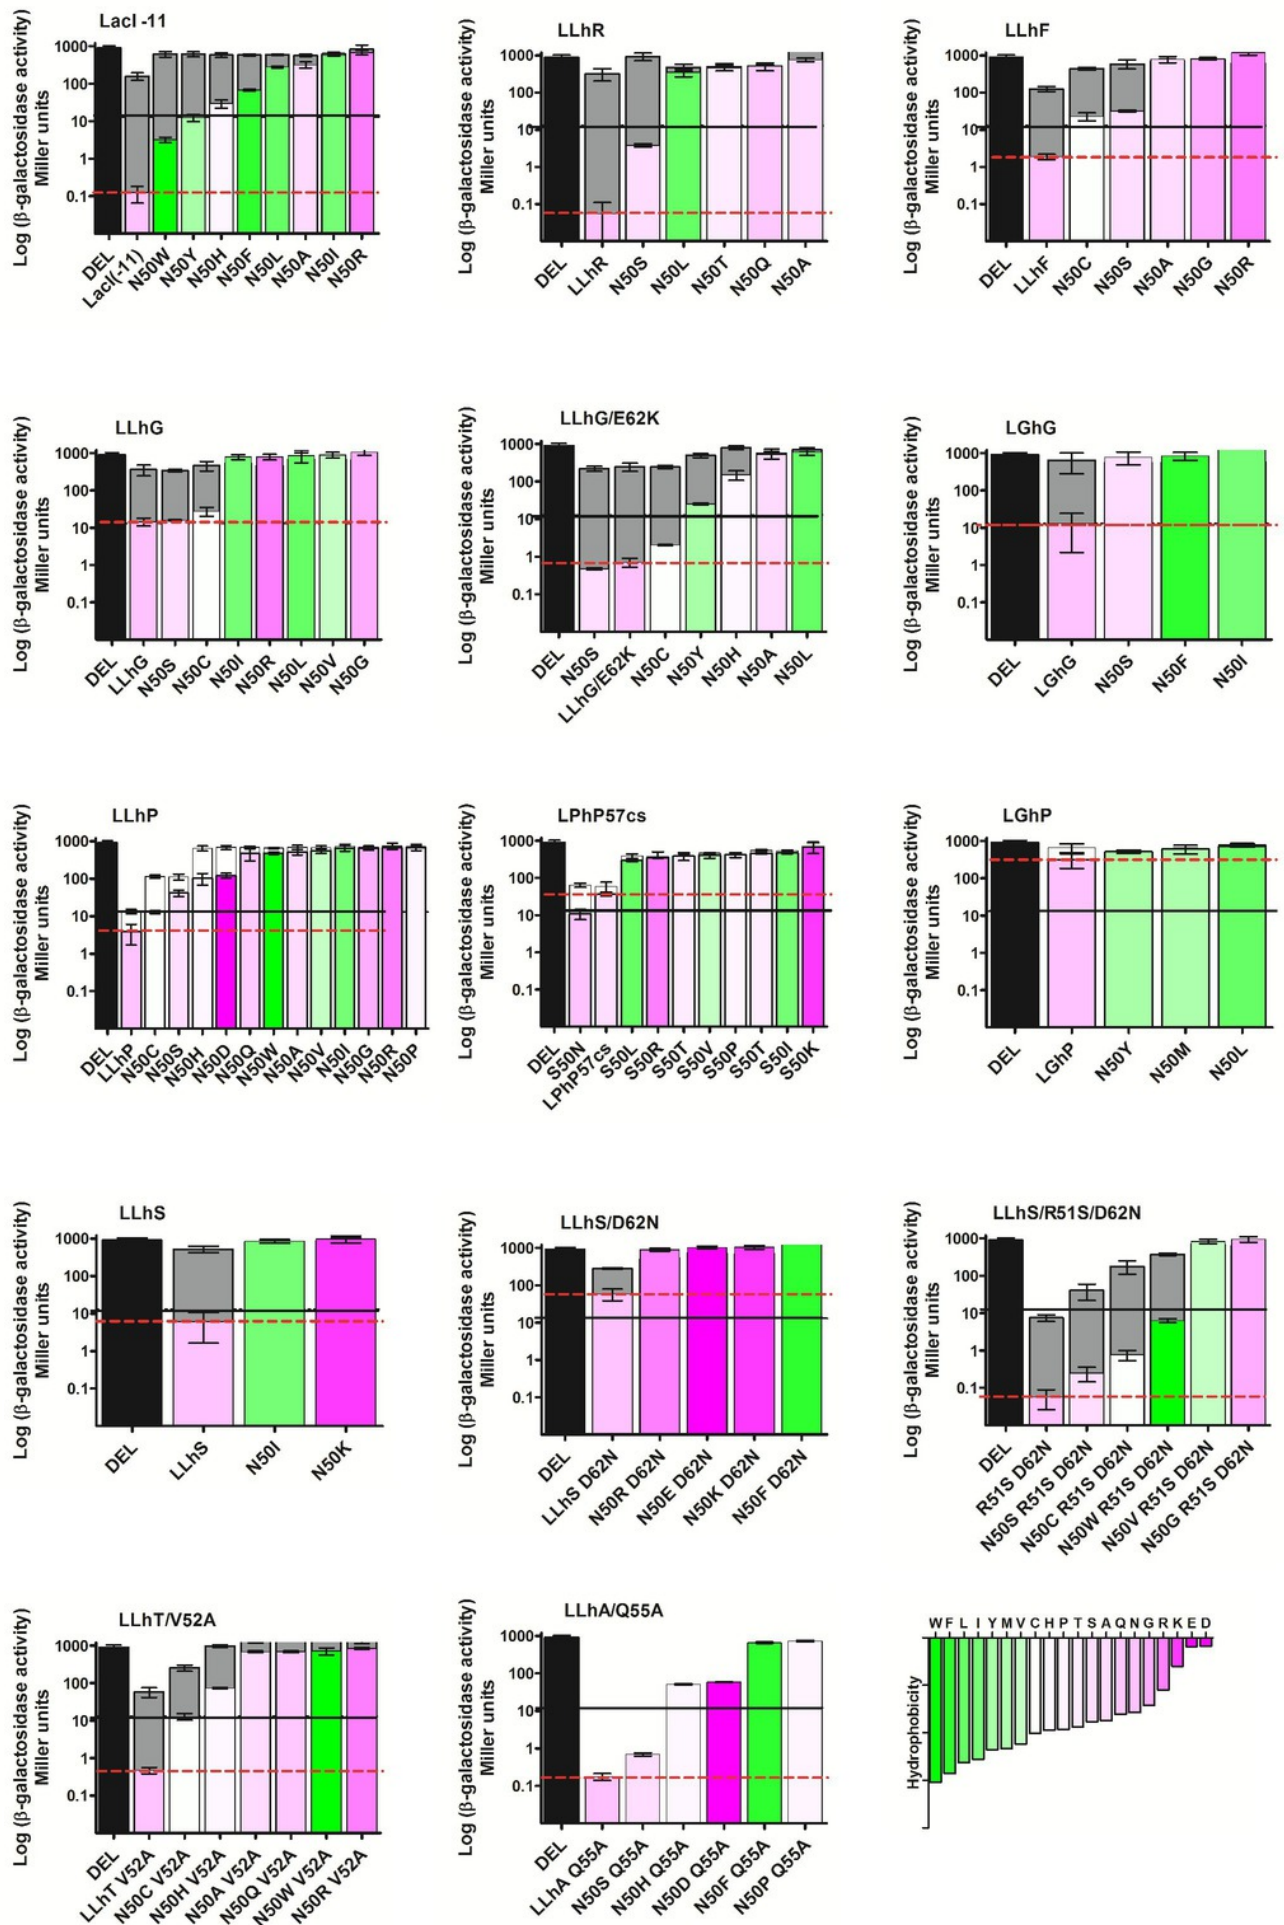

Figure S38: Physicochemical trends: Position 50, Hydrophobicity



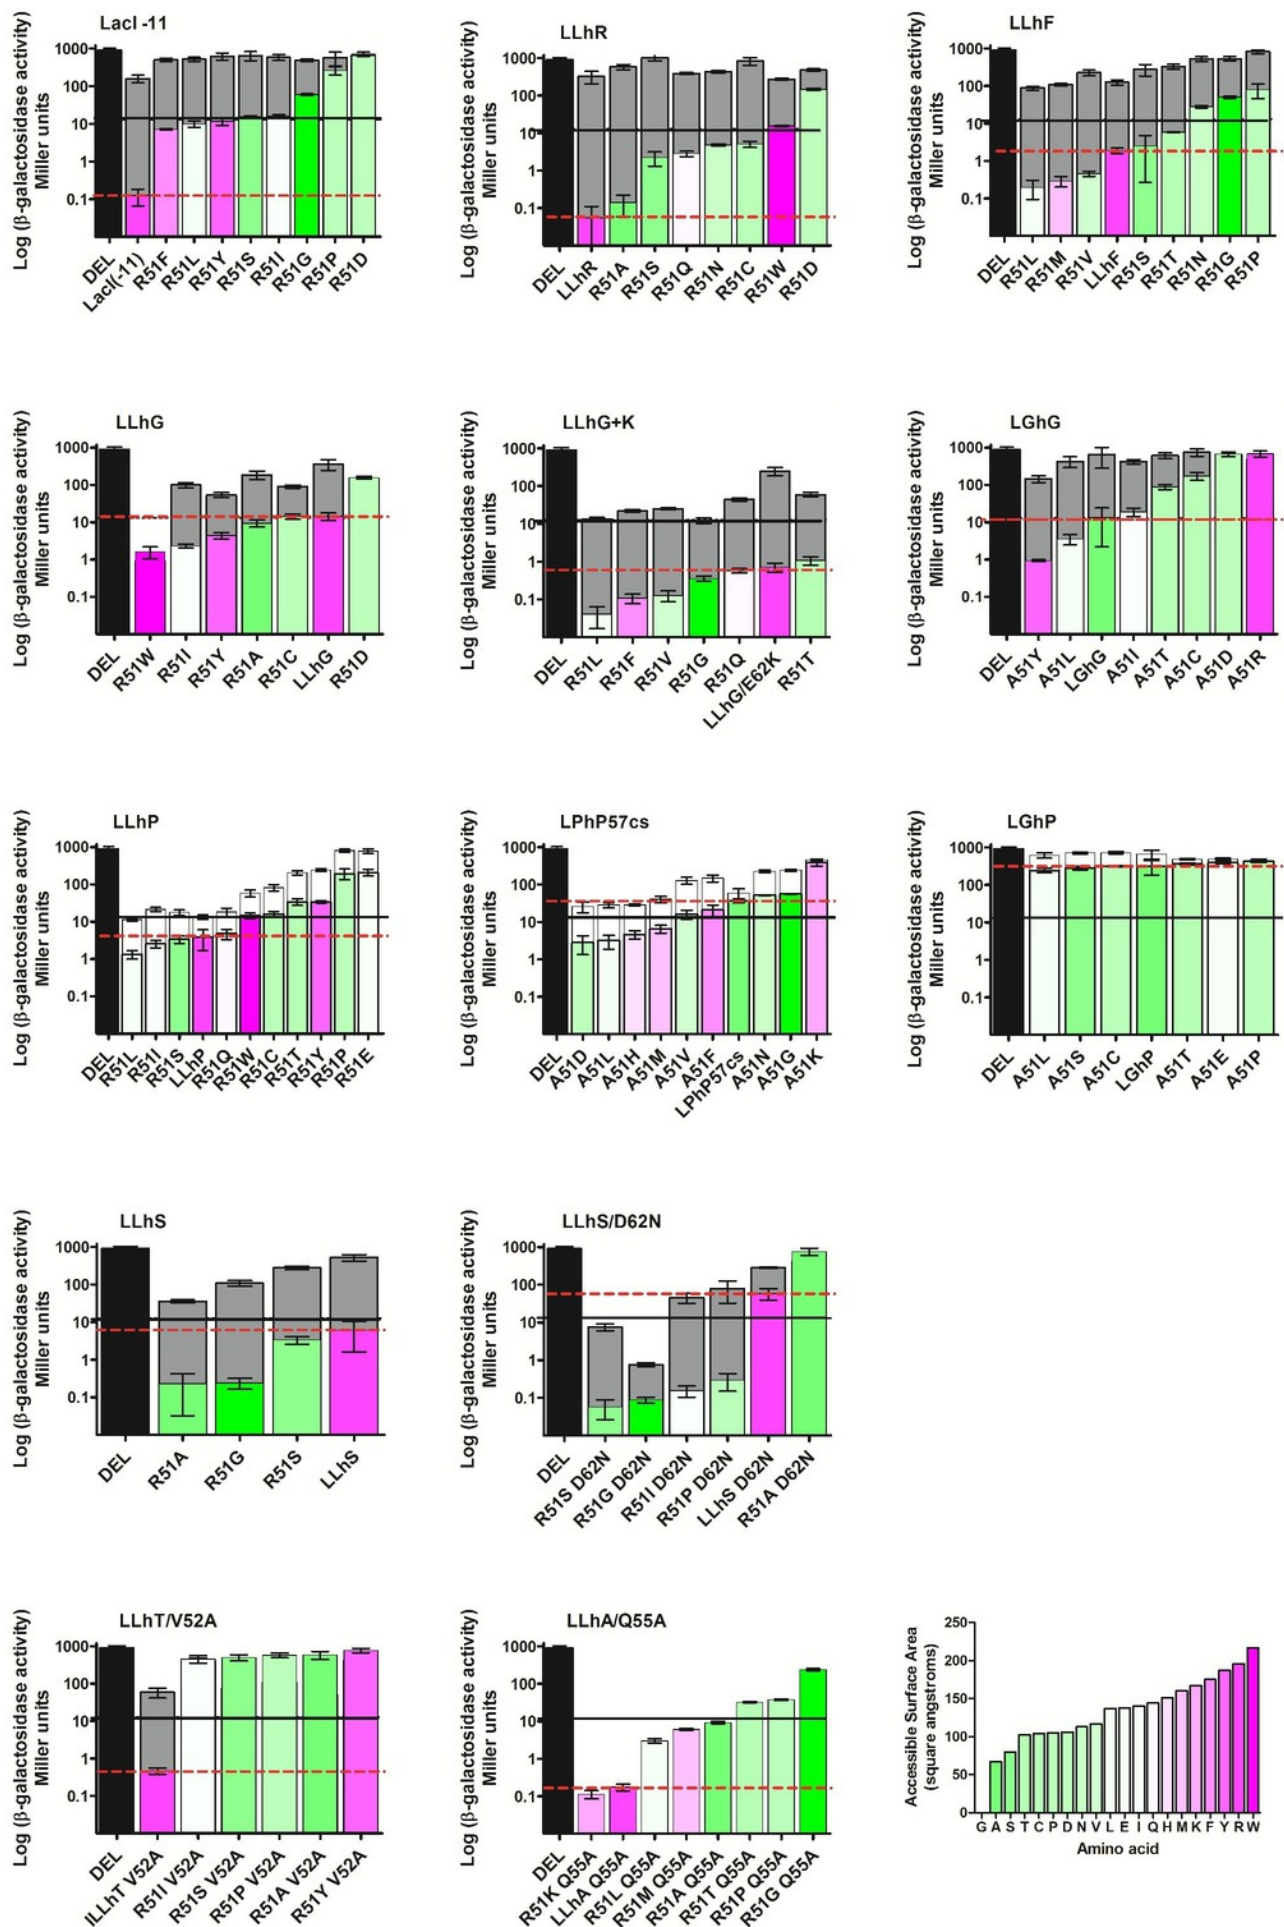

Figure S39: Physicochemical trends: Position 51, Accessible surface area



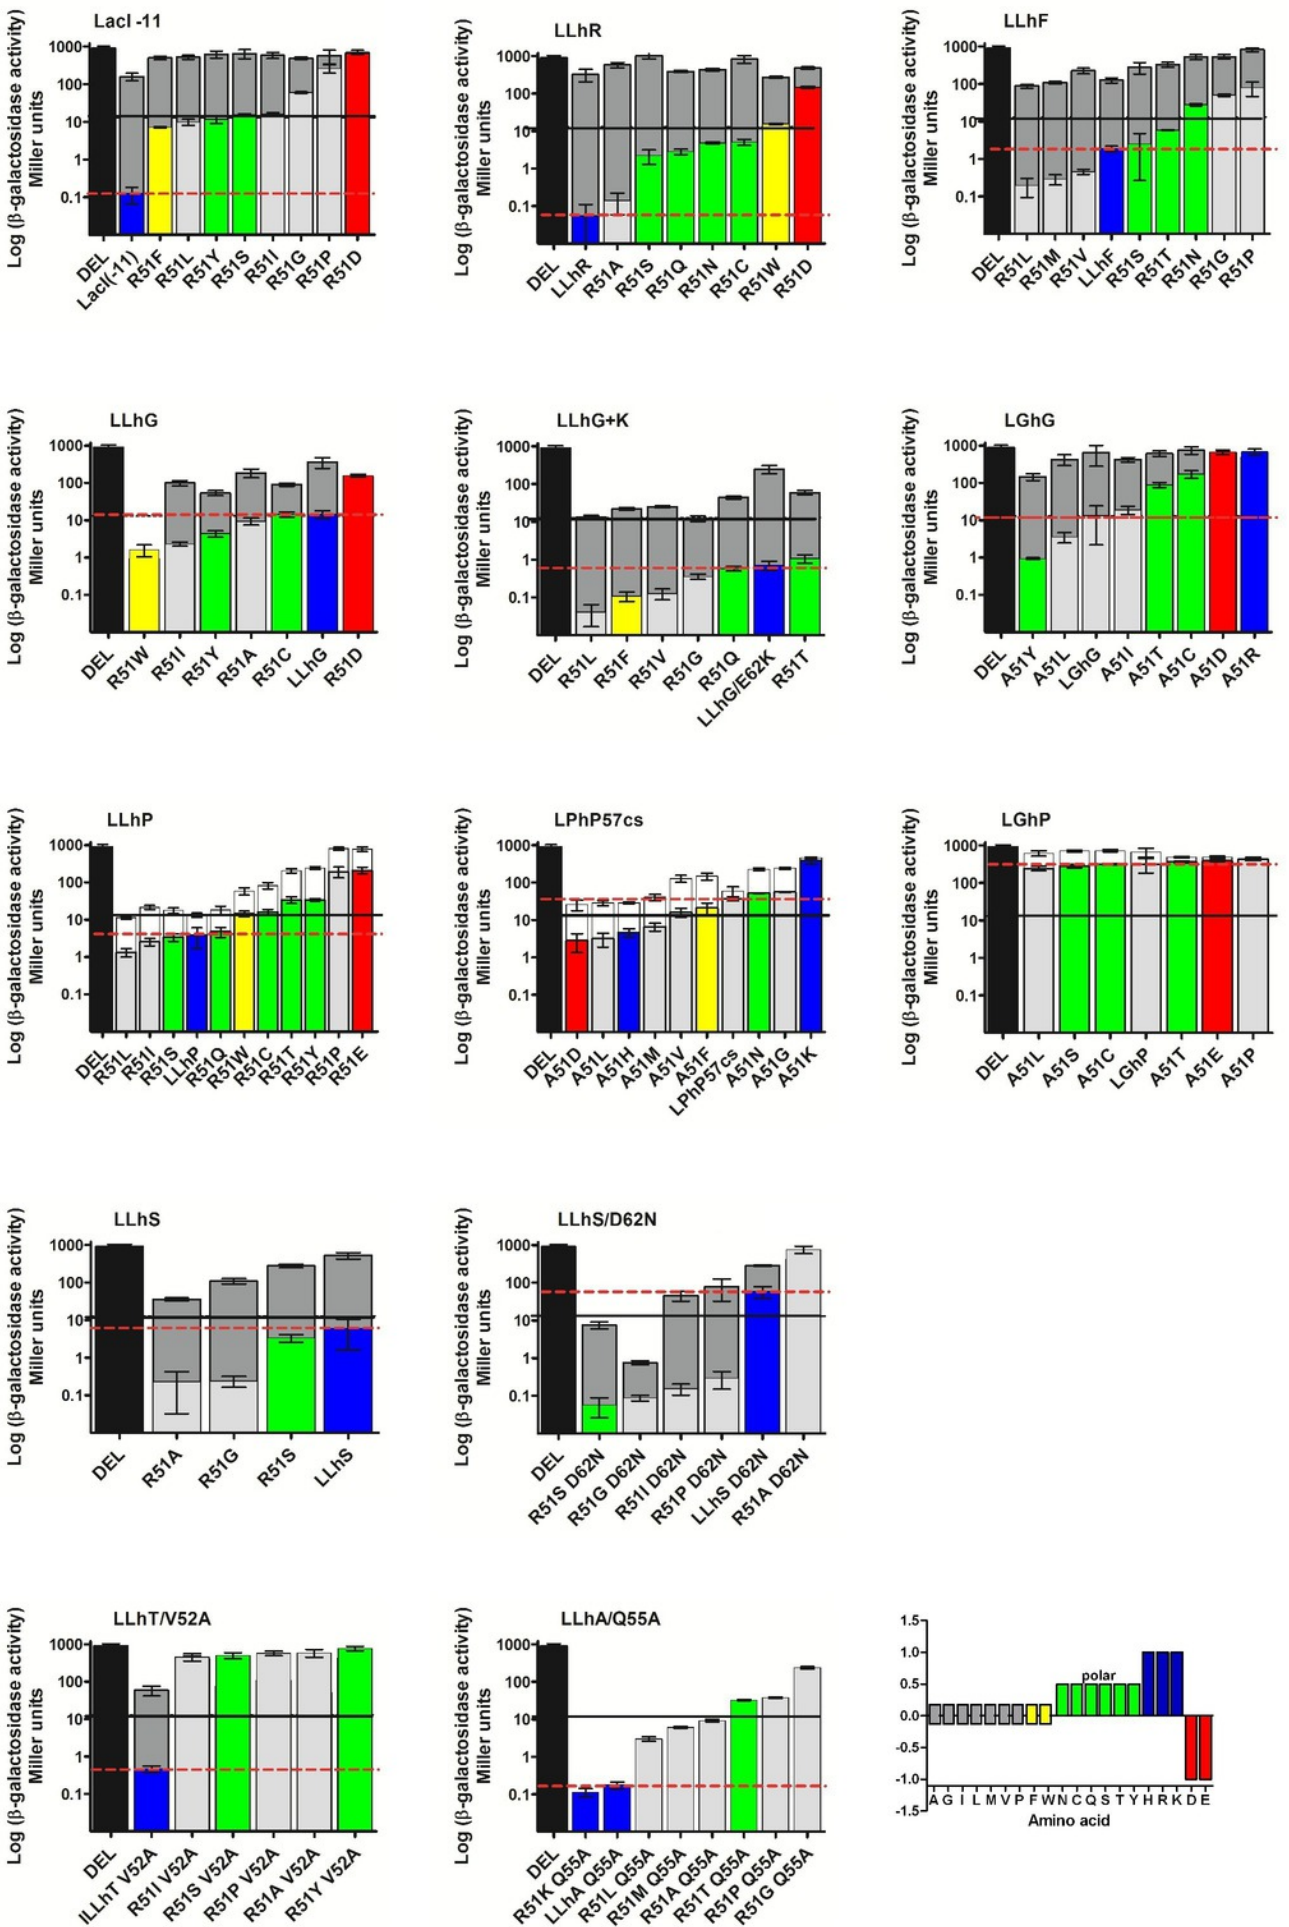

Figure S41: Physicochemical trends: Position 51, Charge/polarity/aromaticity



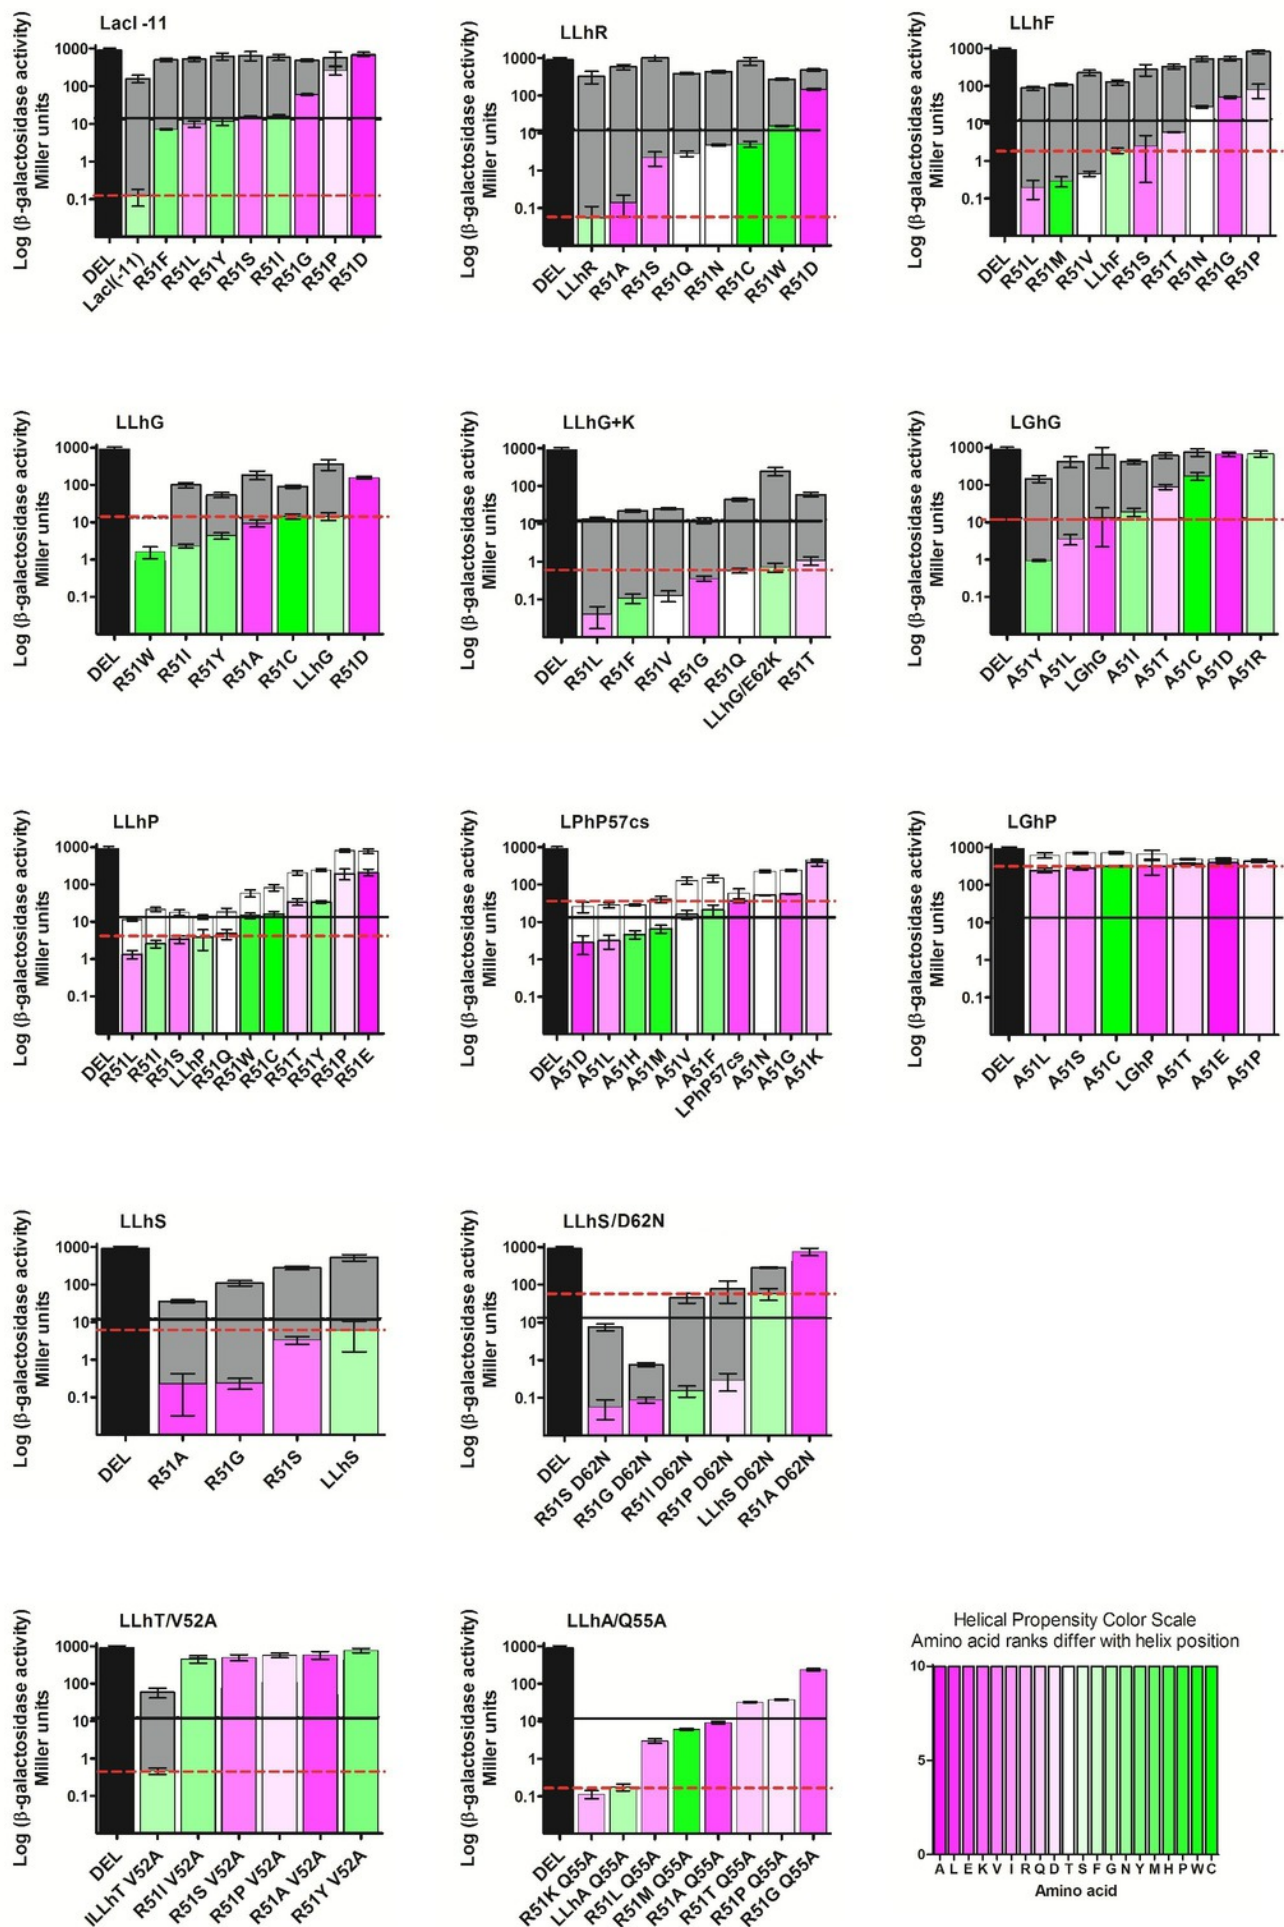

Figure S42: Physicochemical trends: Position 51, Helical propensity (N2 scale)

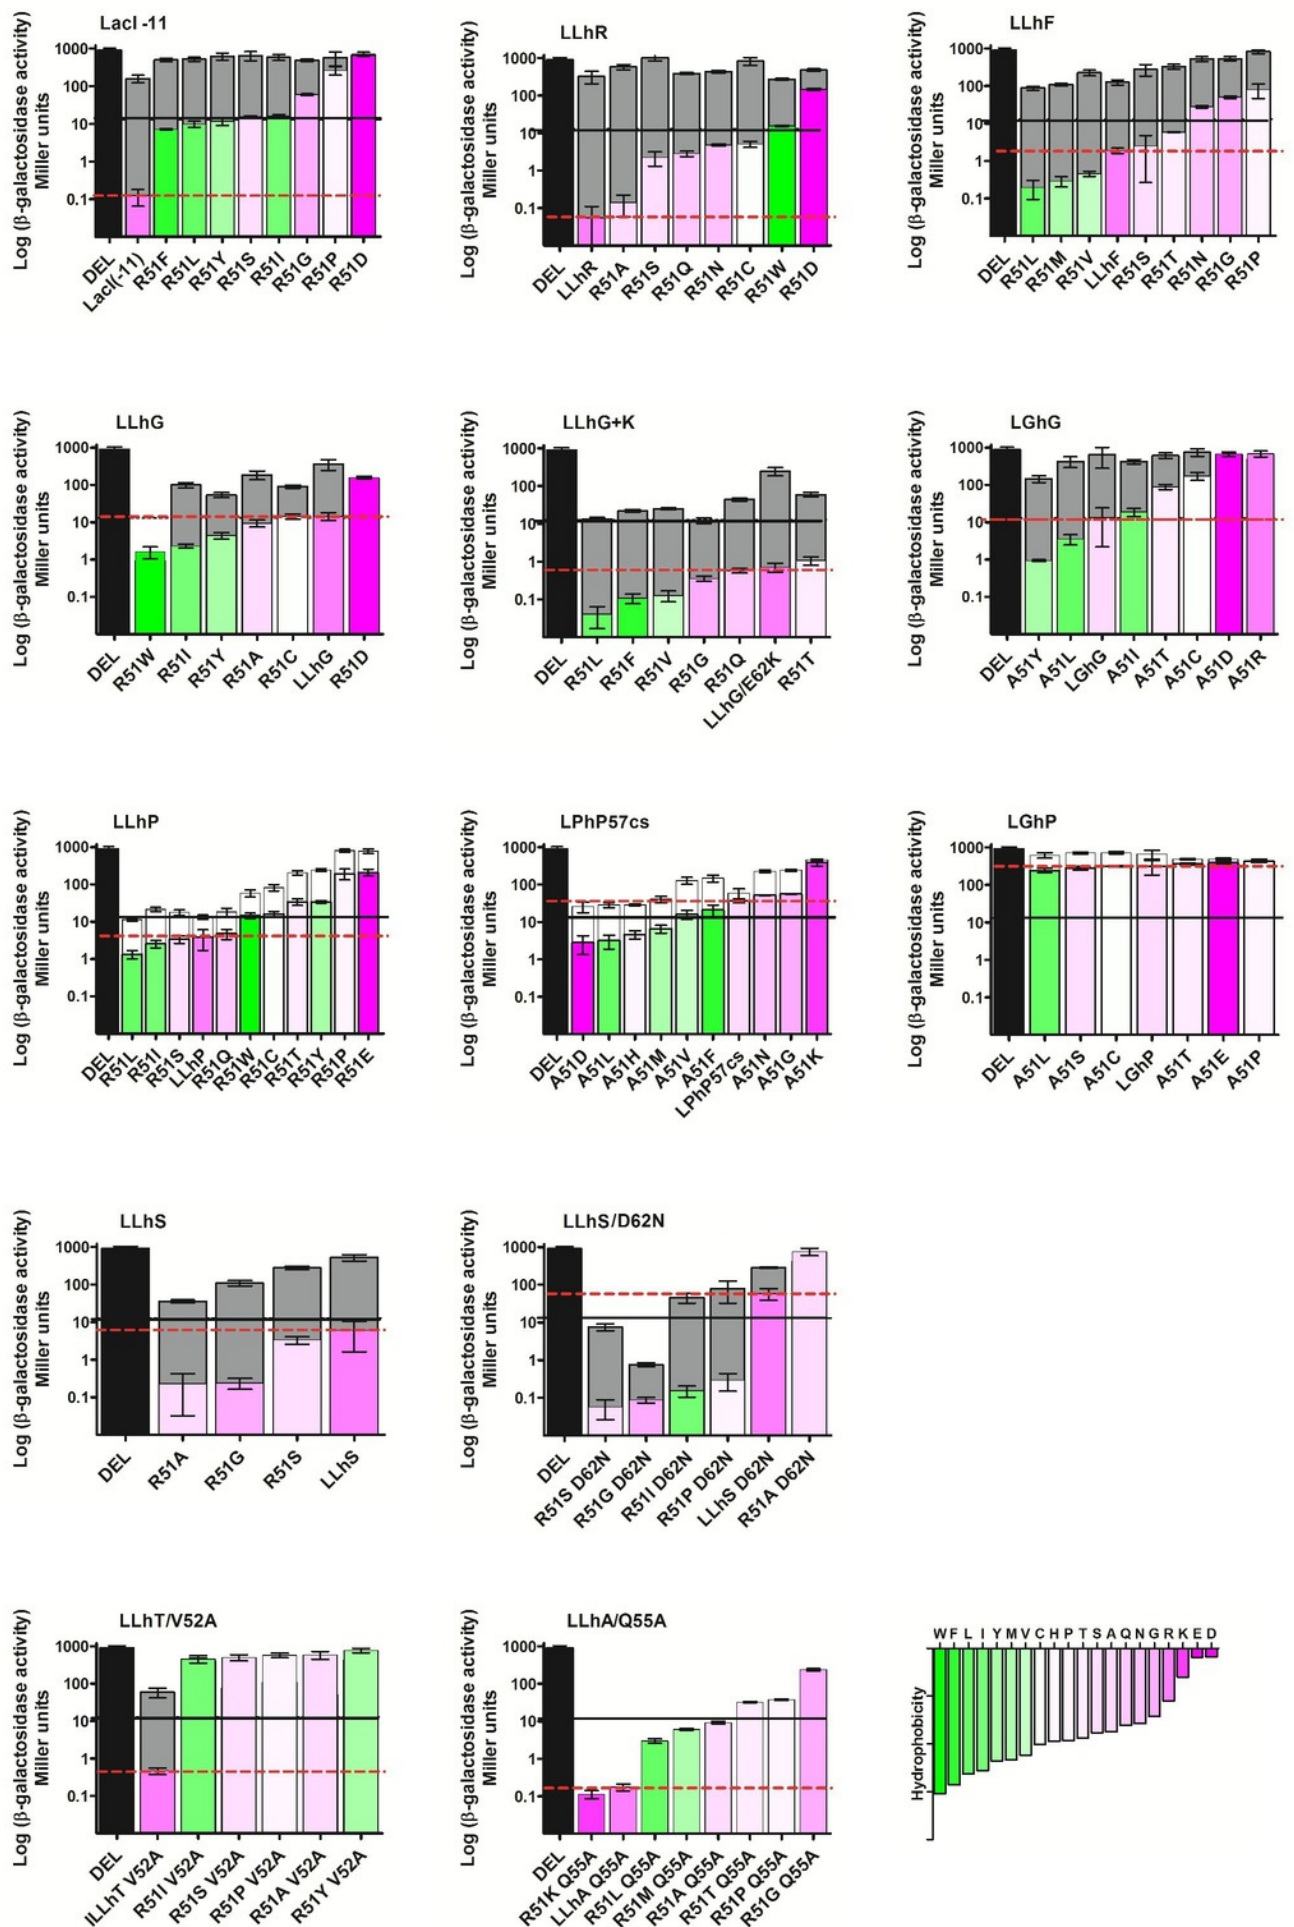

Figure S43: Physicochemical trends: Position 51, Hydrophobicity

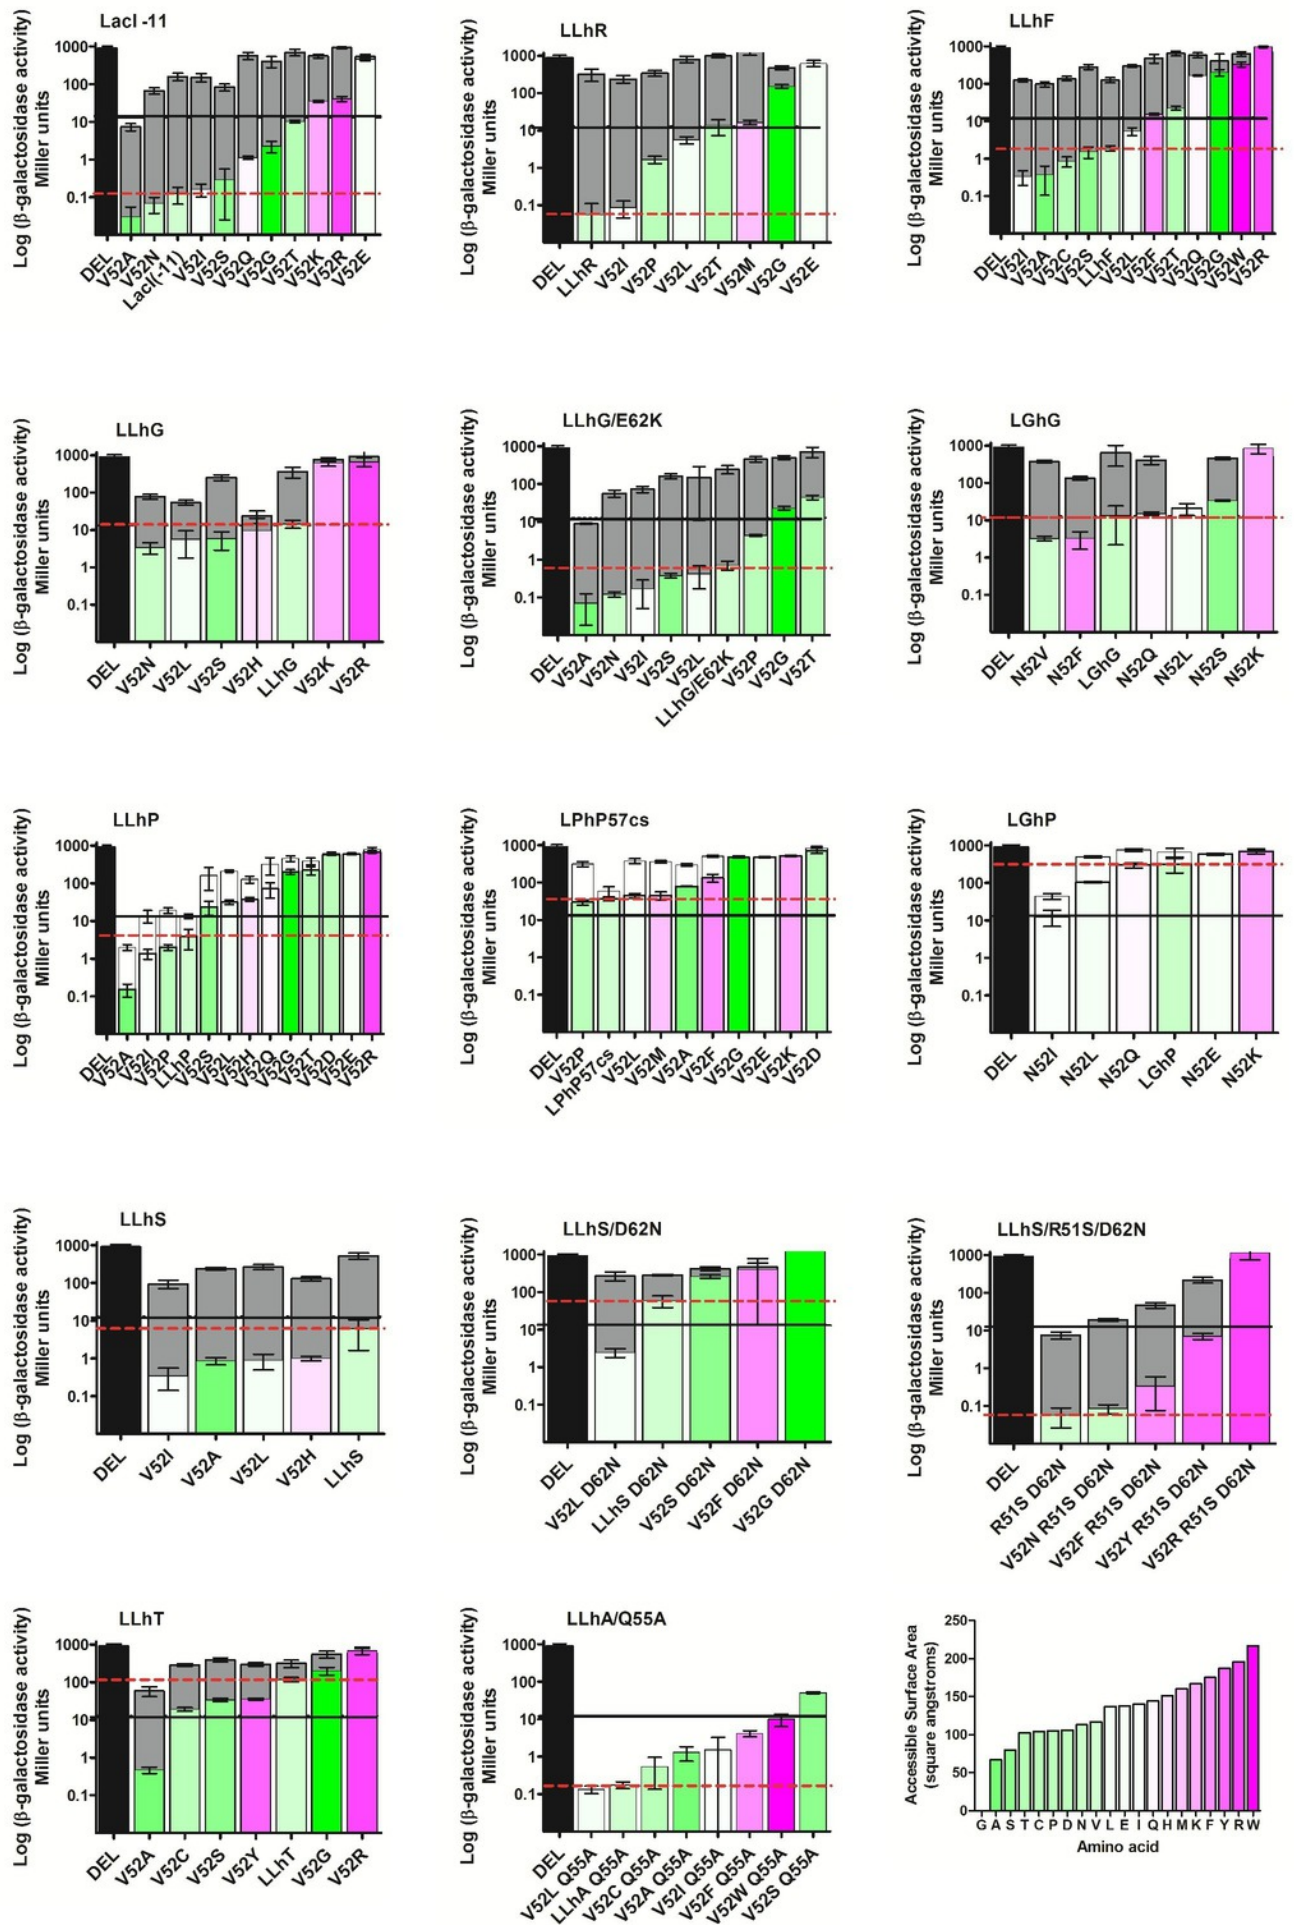

Figure S44: Physicochemical trends: Position 52, Accessible surface area



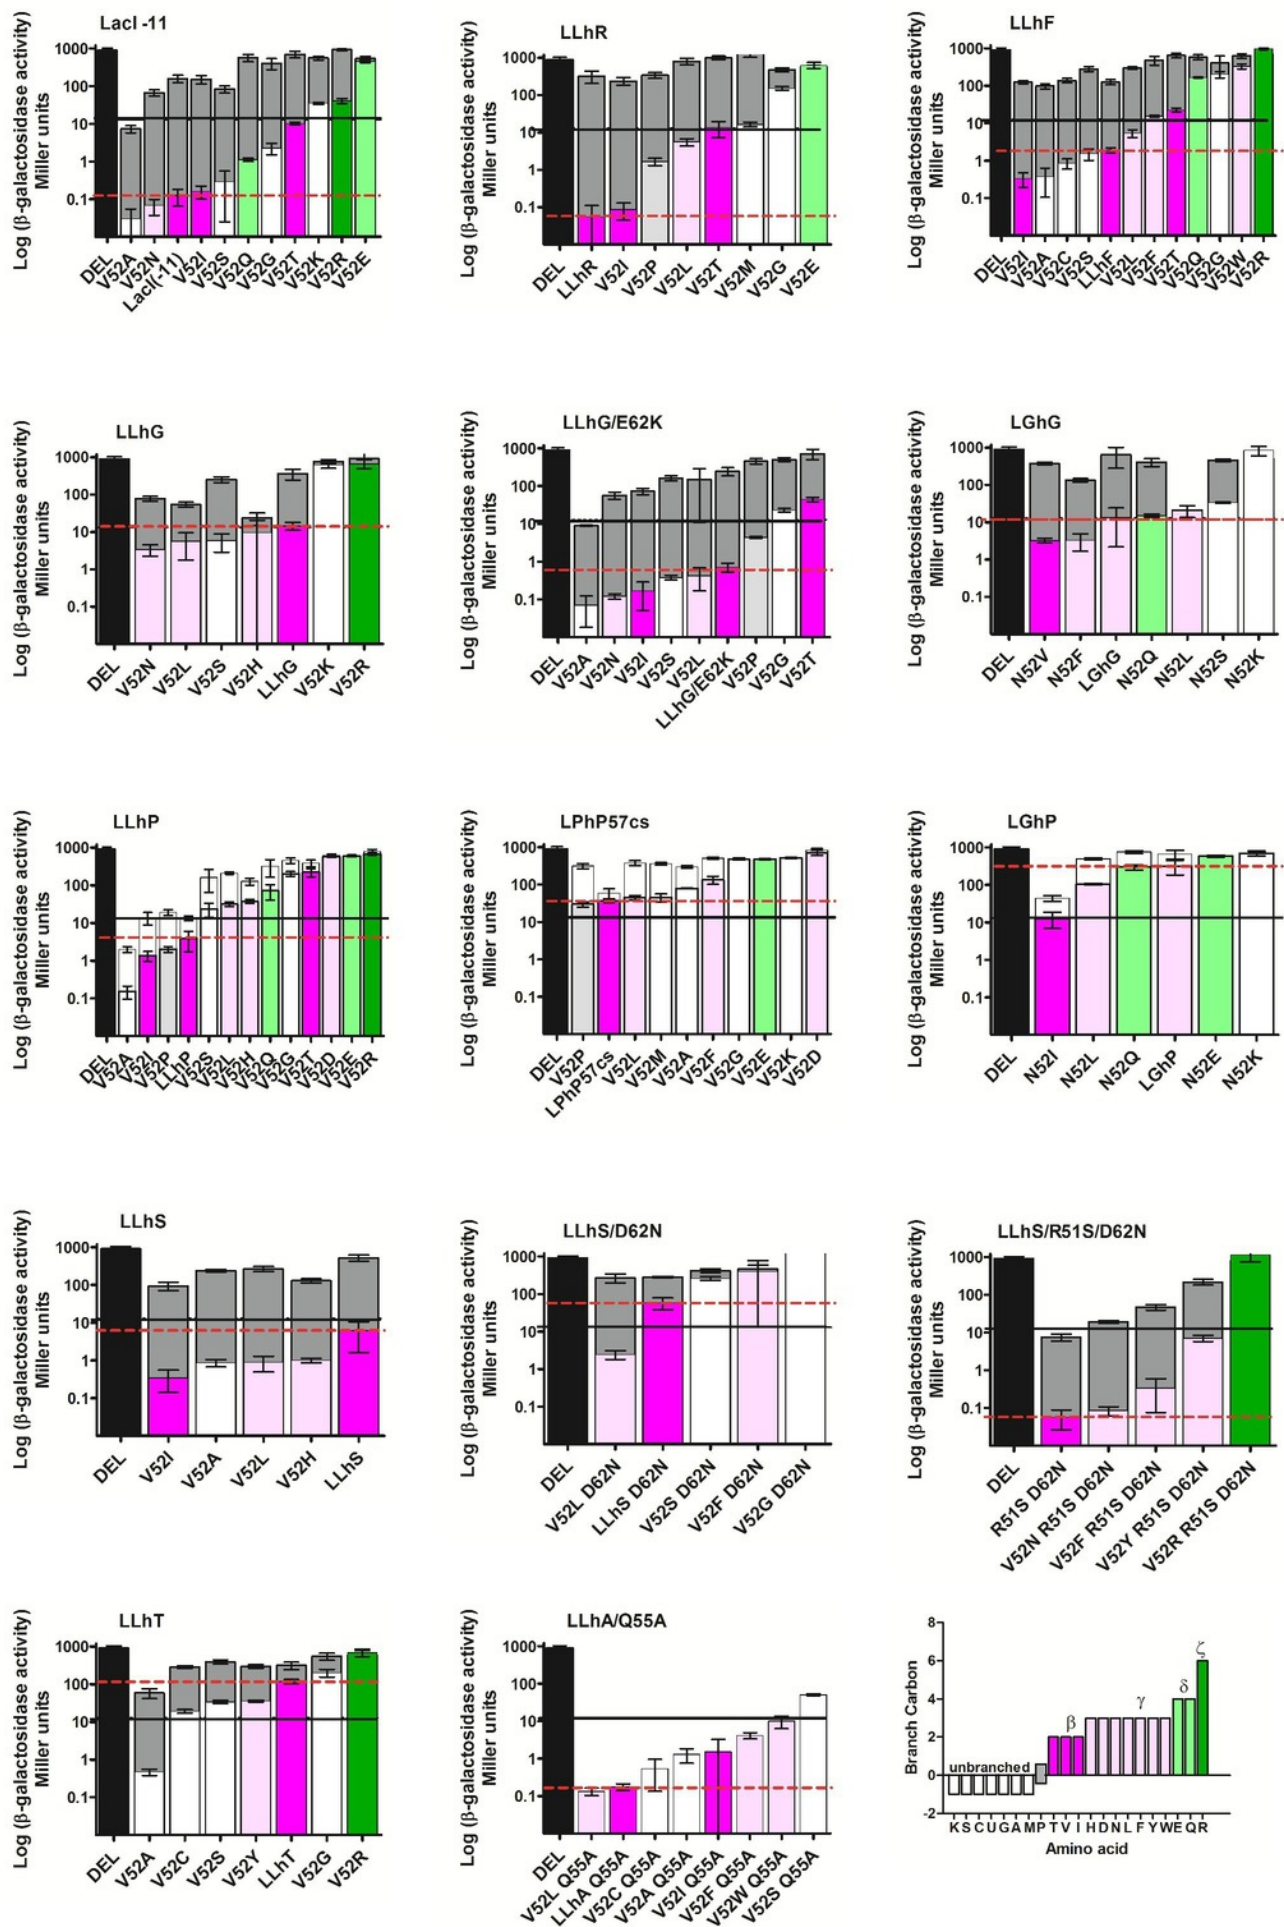

Figure S45: Physicochemical trends: Position 52, Side chain branching

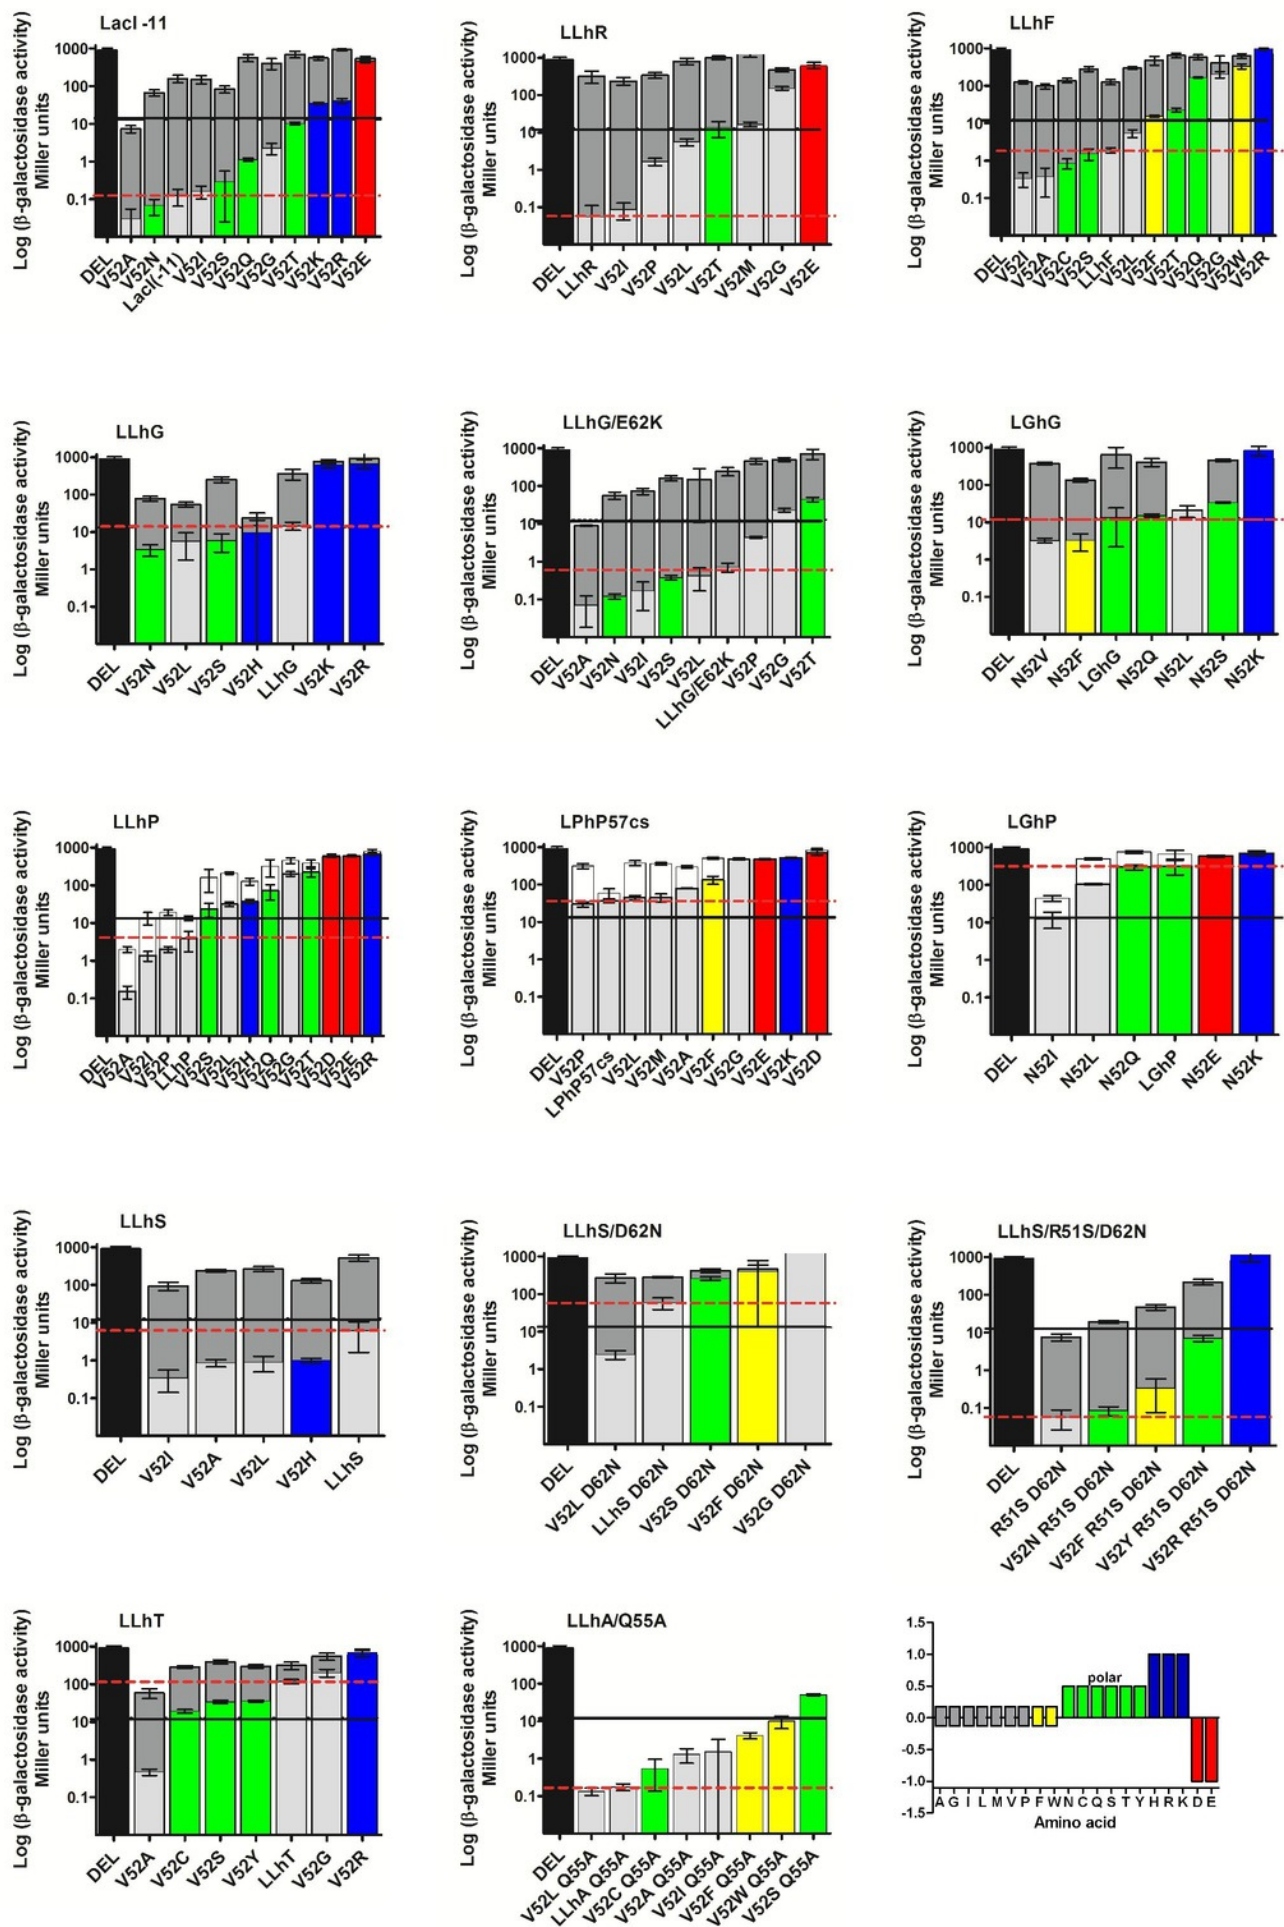

Figure S46: Physicochemical trends: Position 52, Charge/polarity/aromaticity



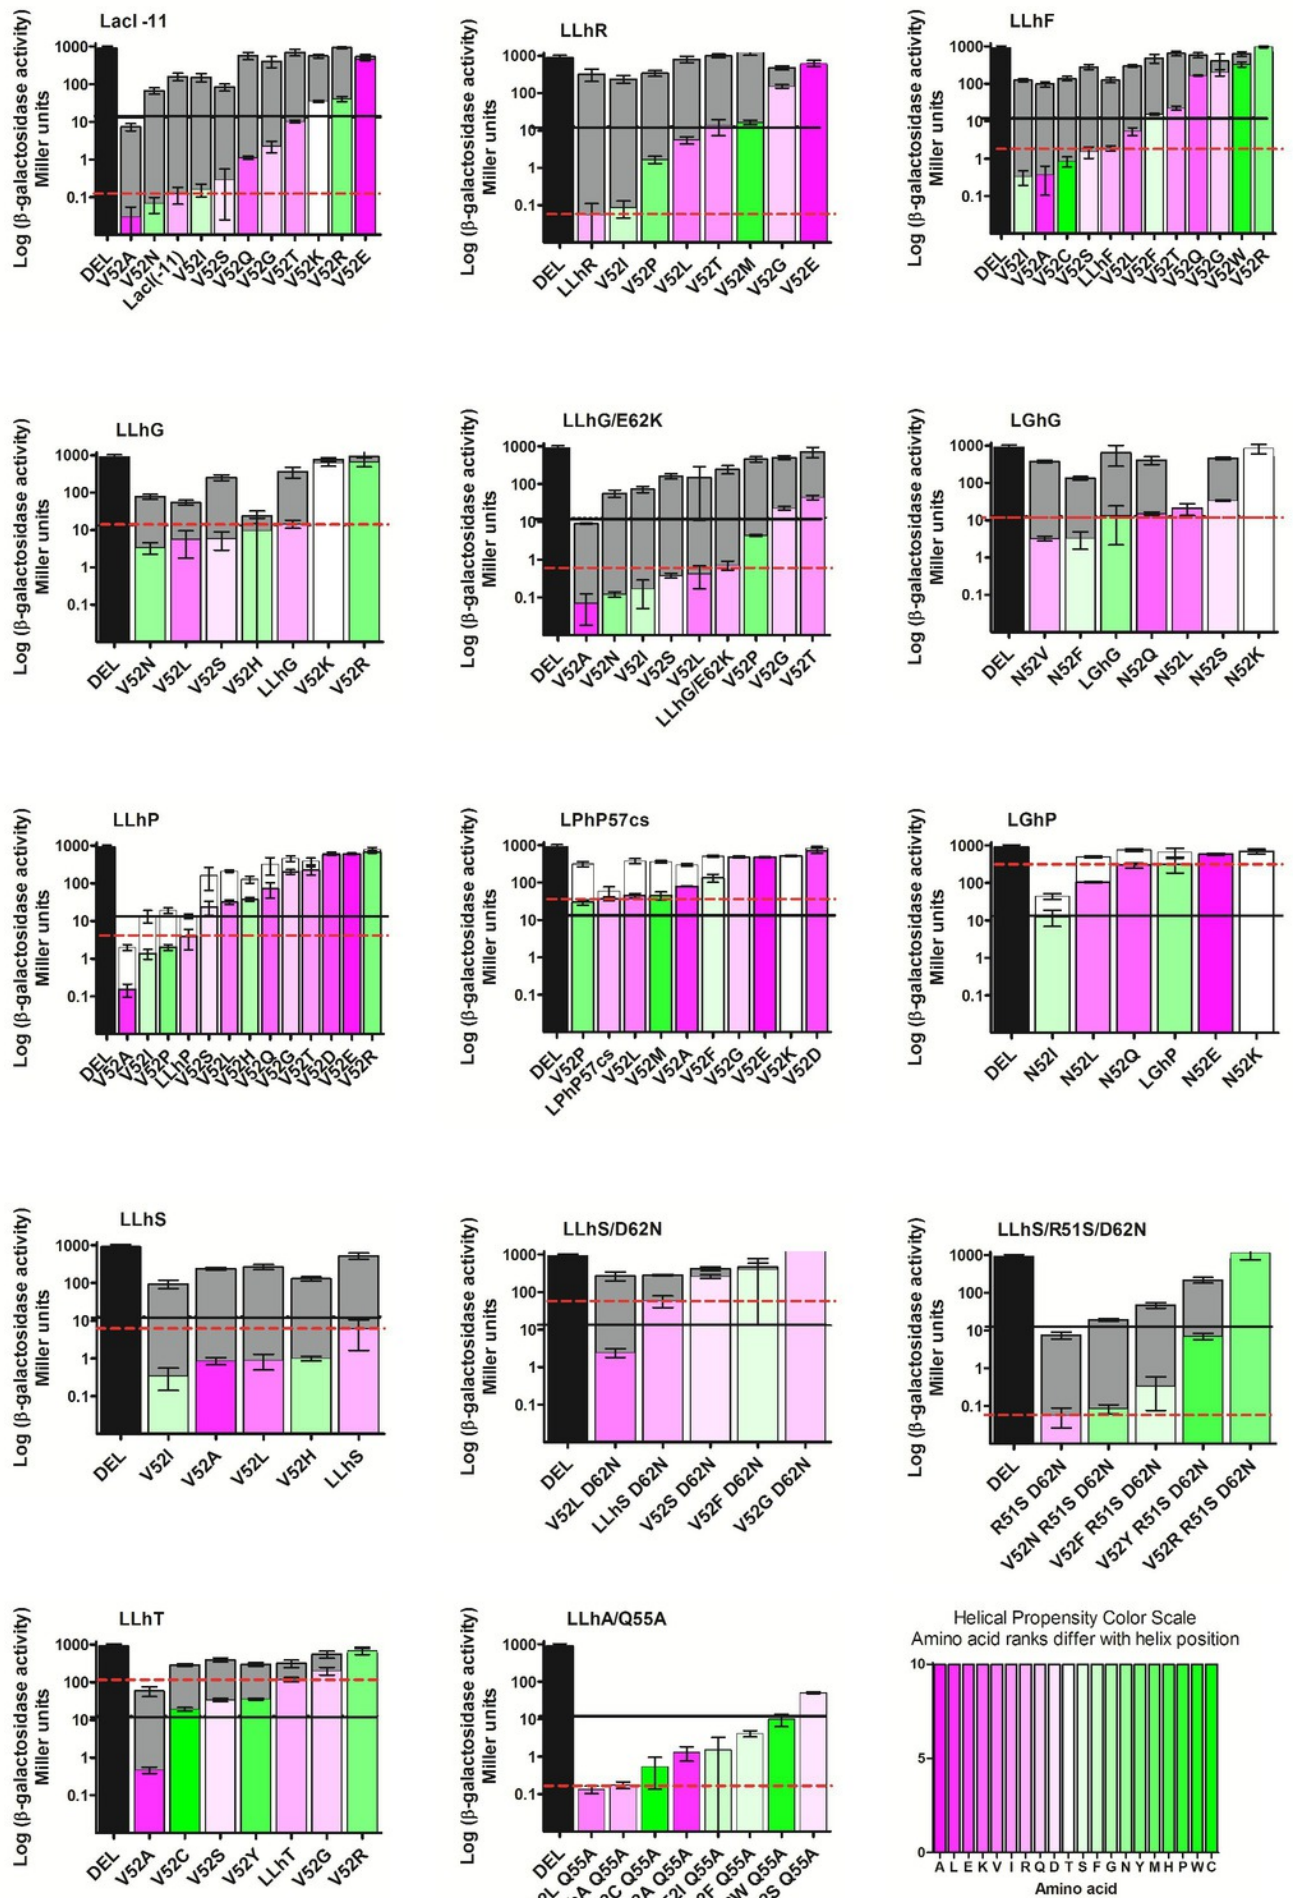

Figure S47: Physicochemical trends: Position 52, Helical propensity (N3 scale)

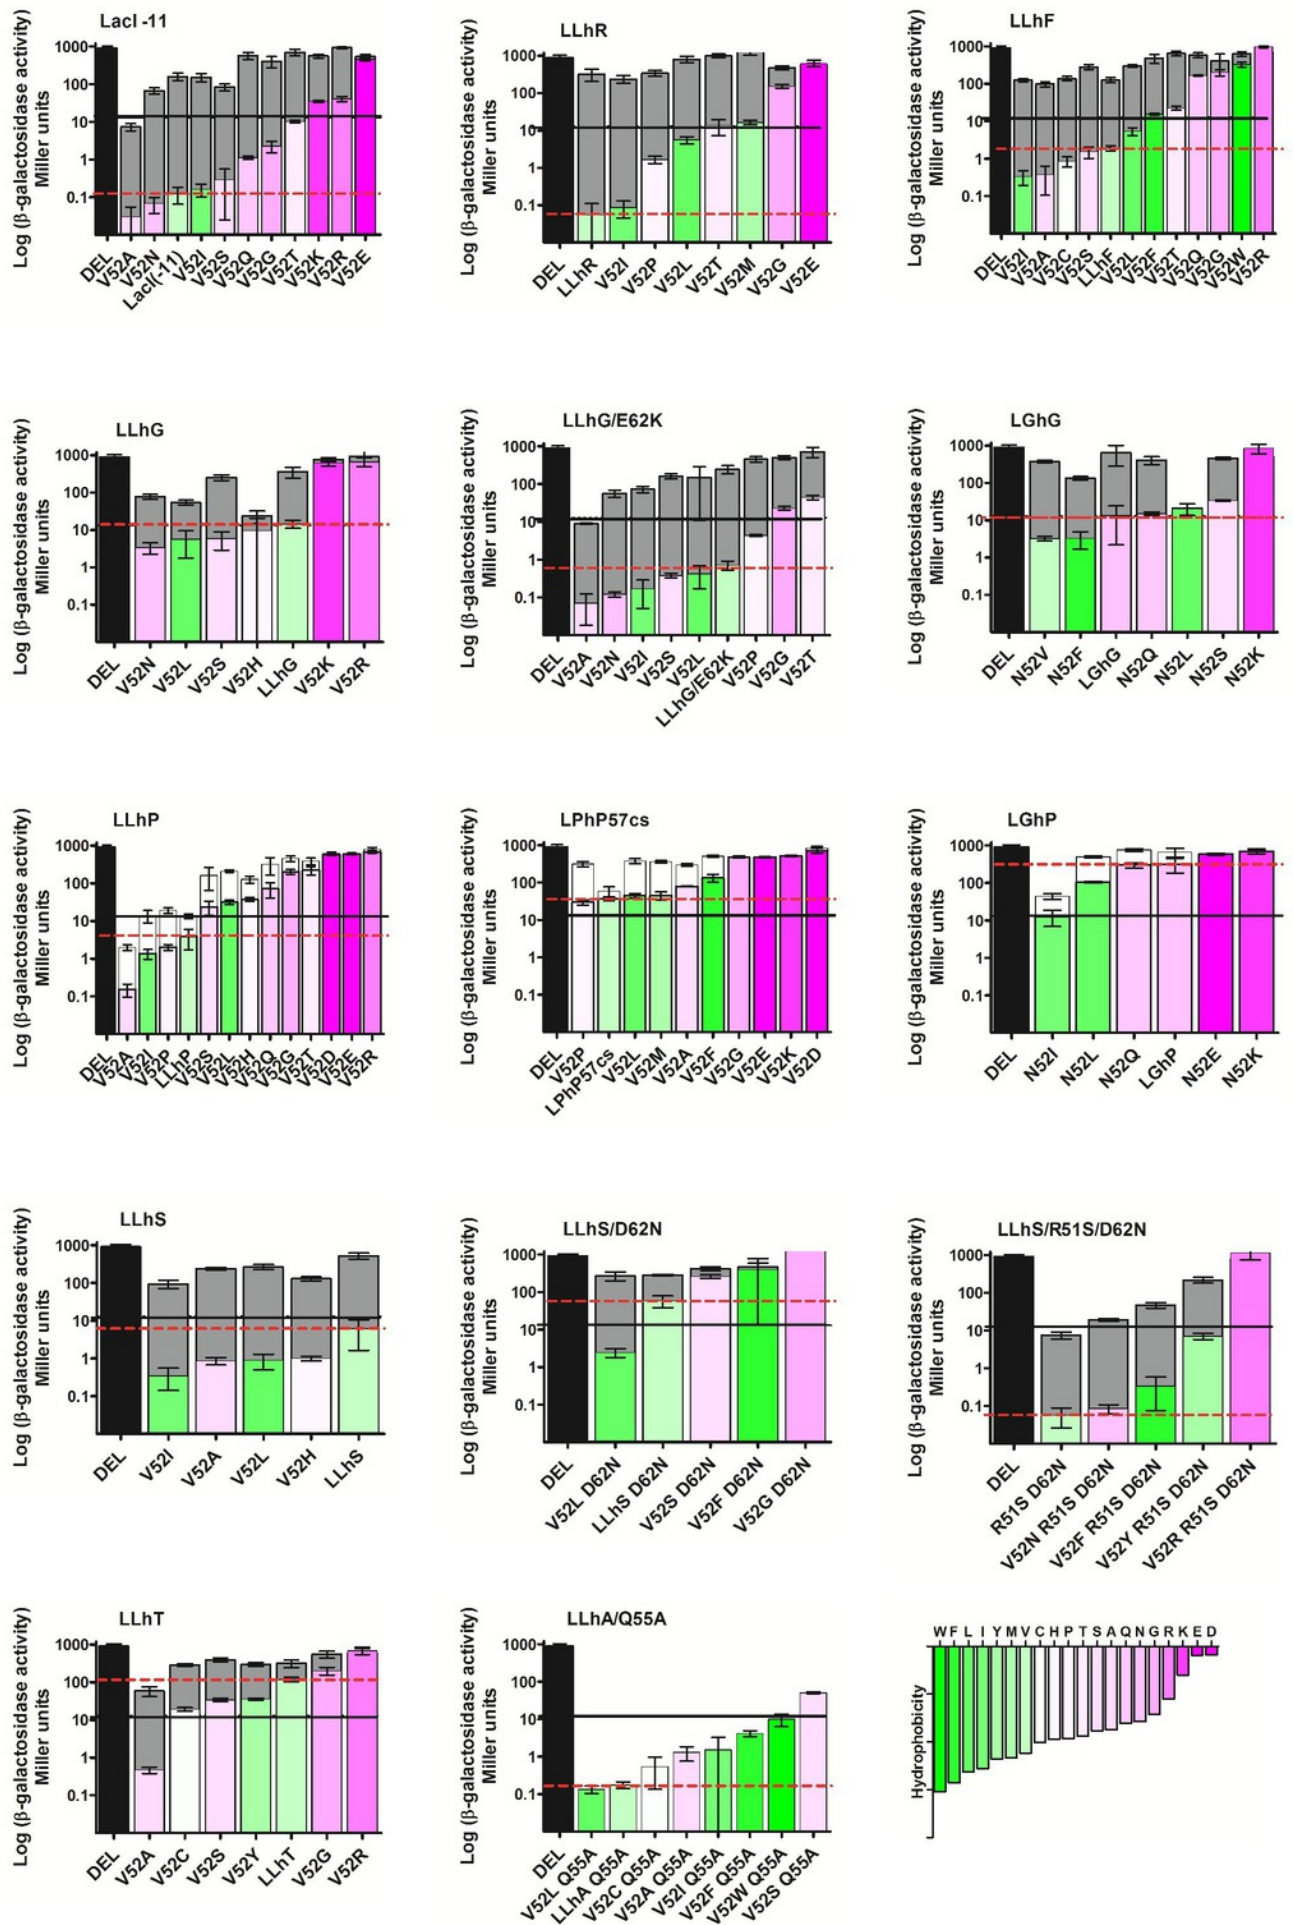

Figure S48: Physicochemical trends: Position 52, Hydrophobicity



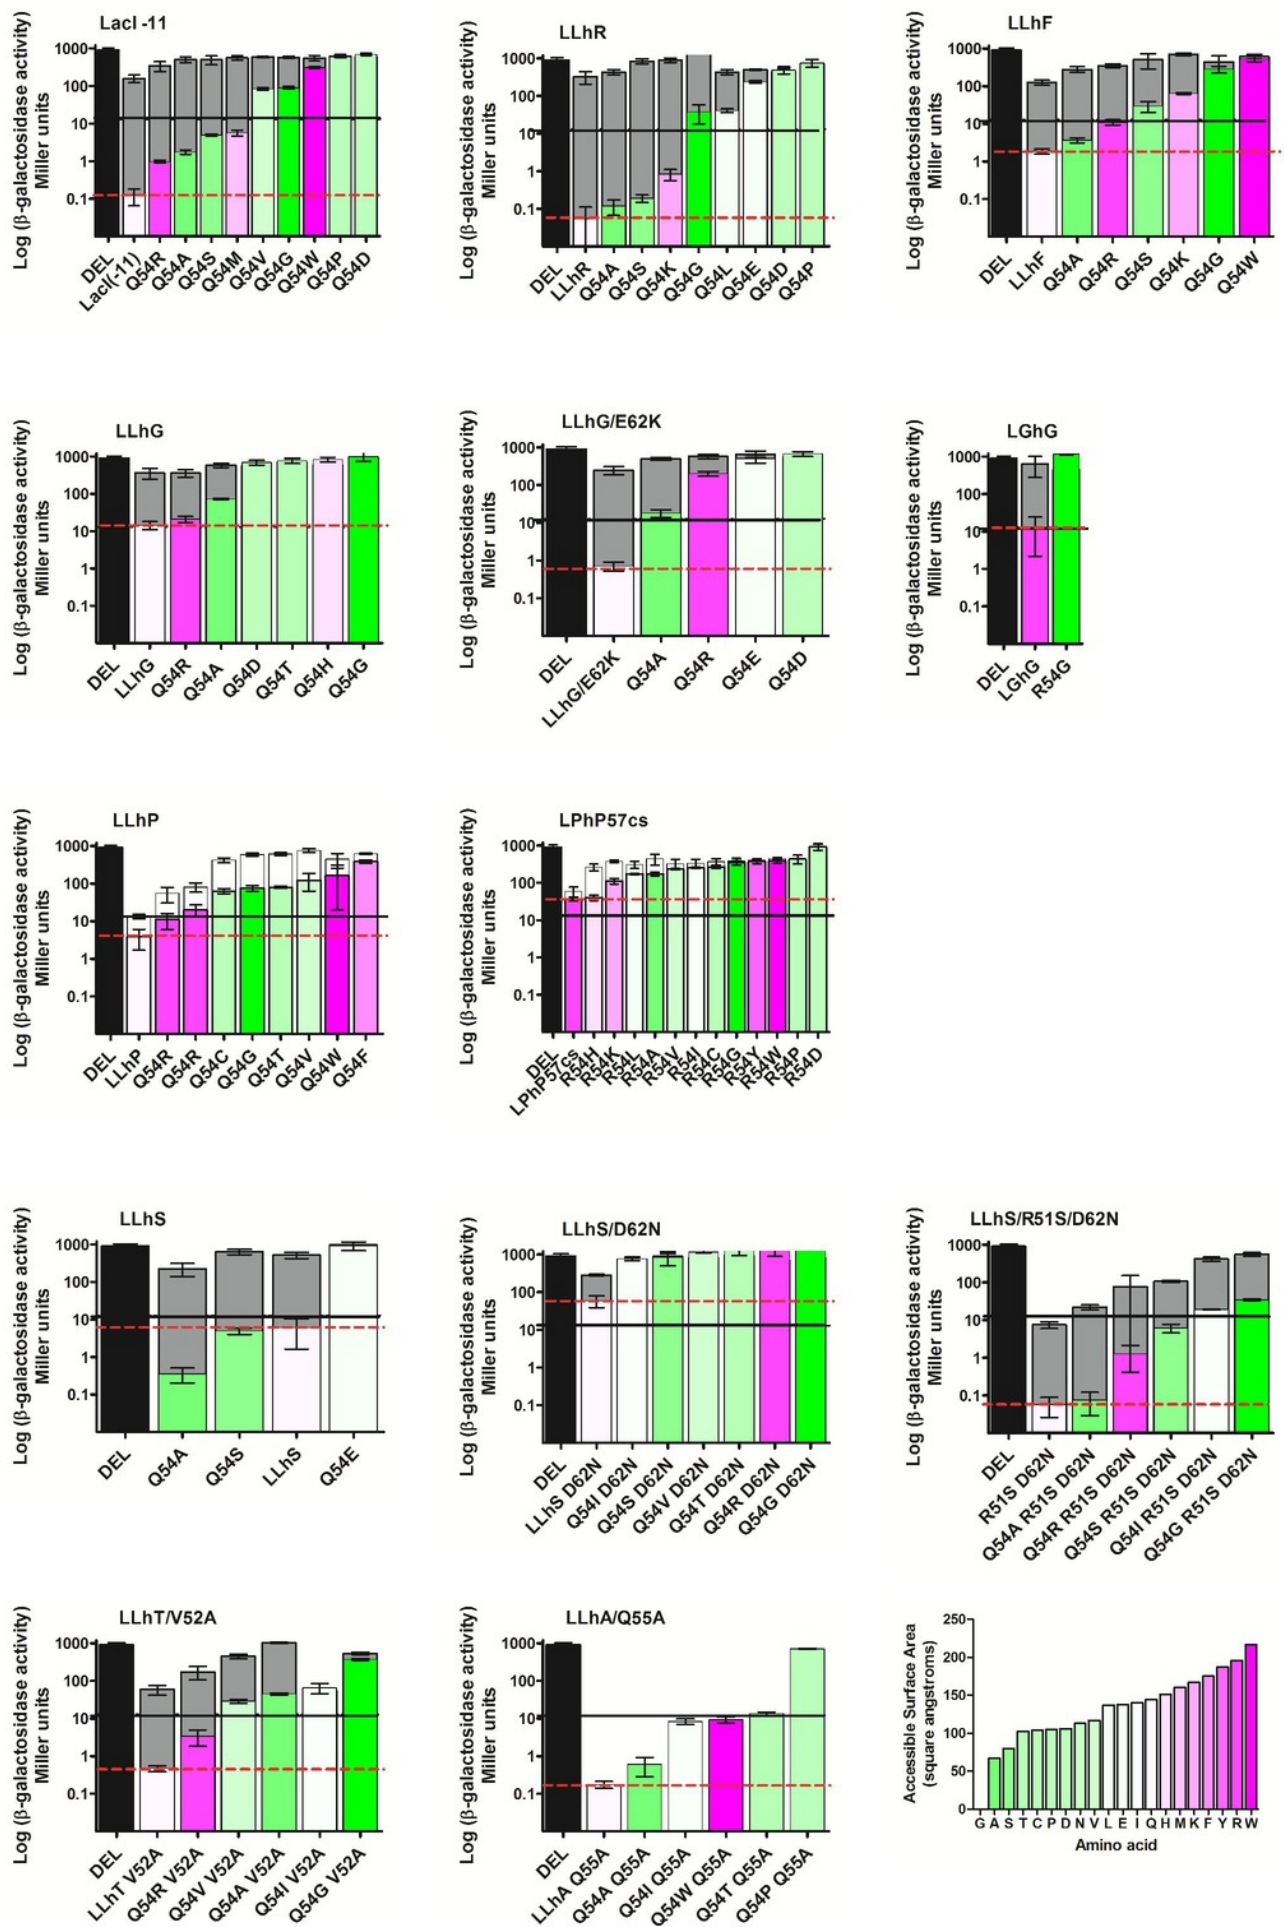

Figure S49: Physicochemical trends: Position 54, Accessible surface area



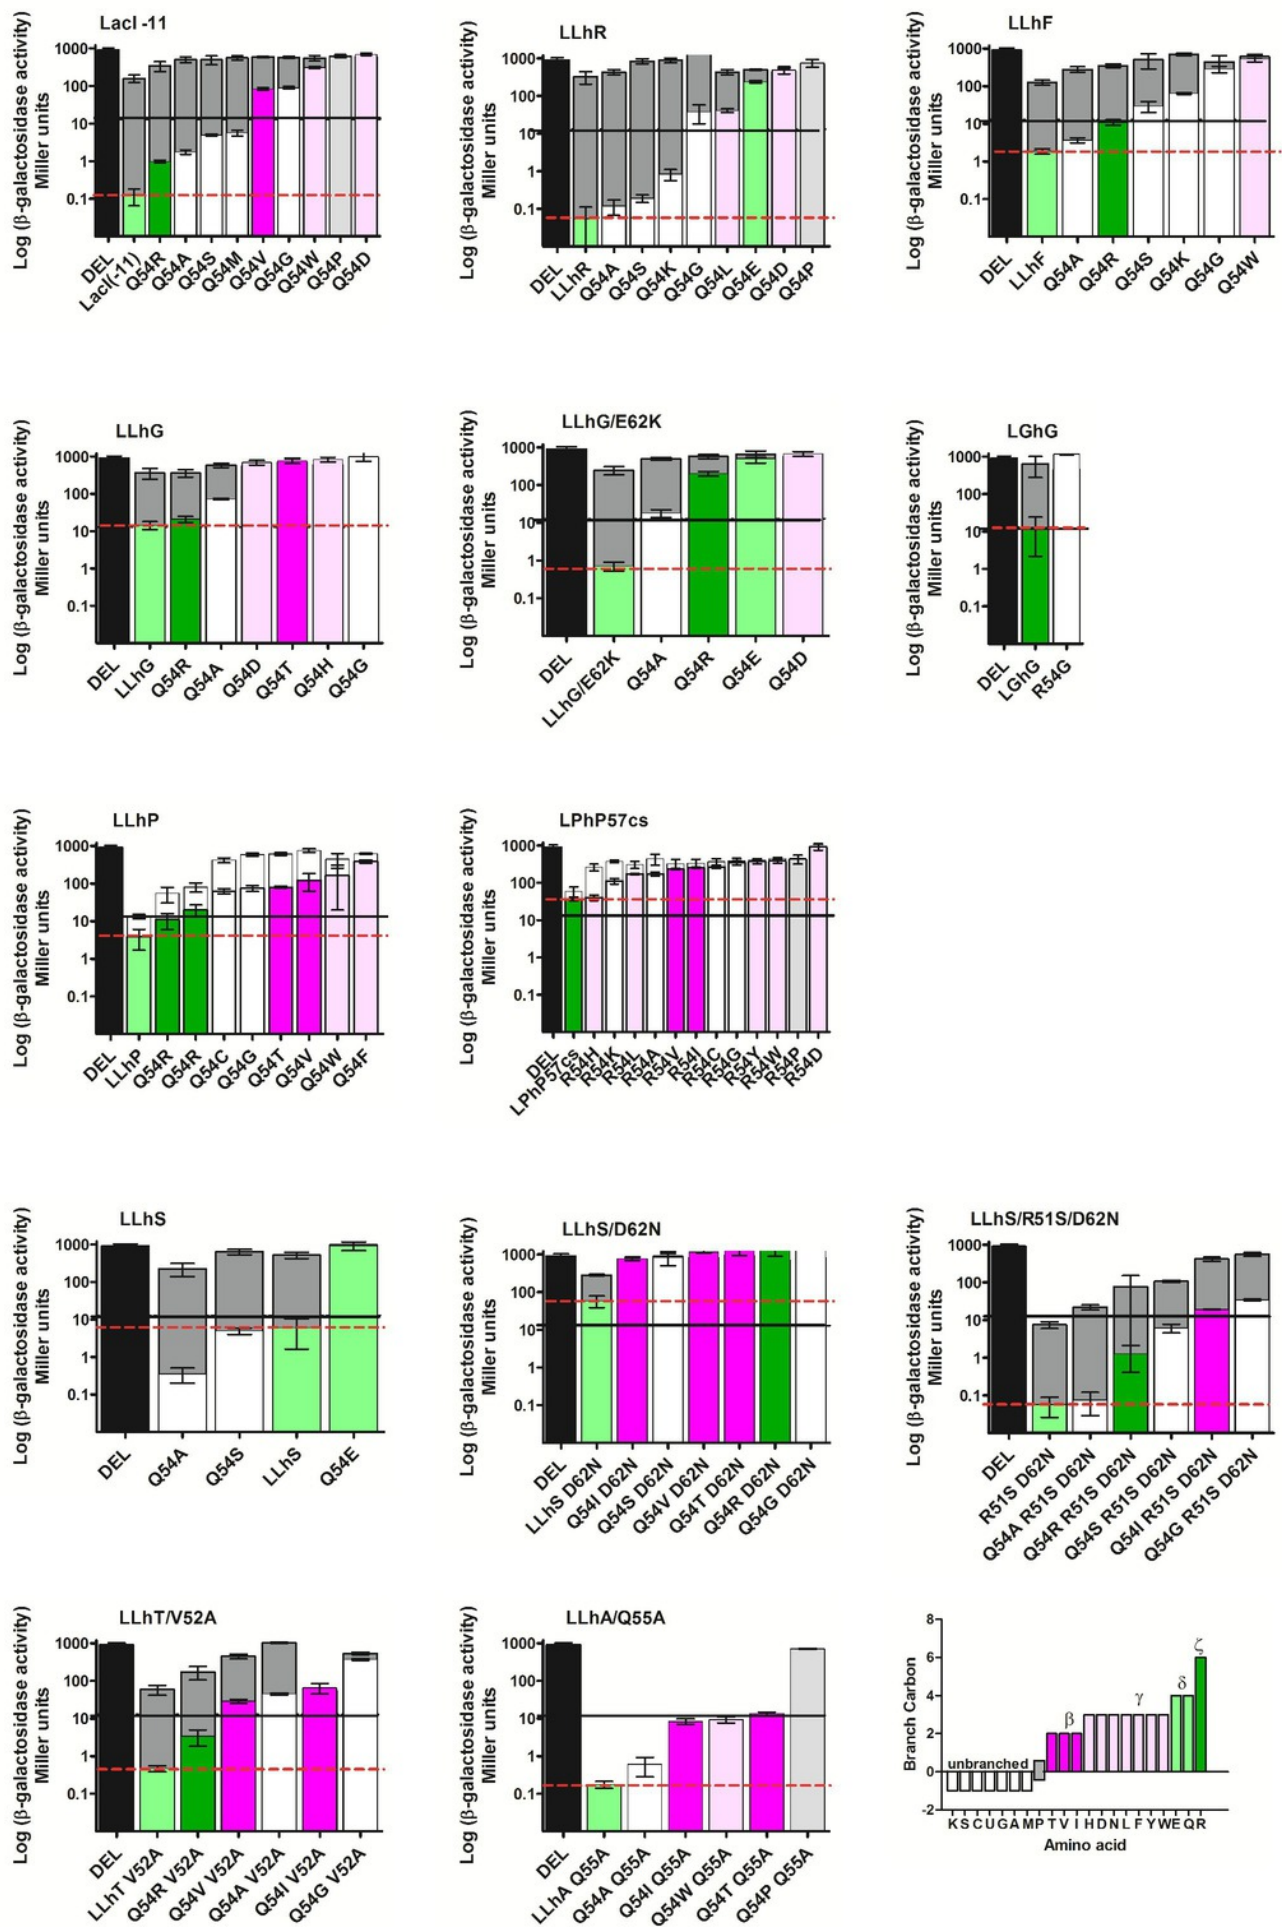

Figure S50: Physicochemical trends: Position 54, Side chain branching

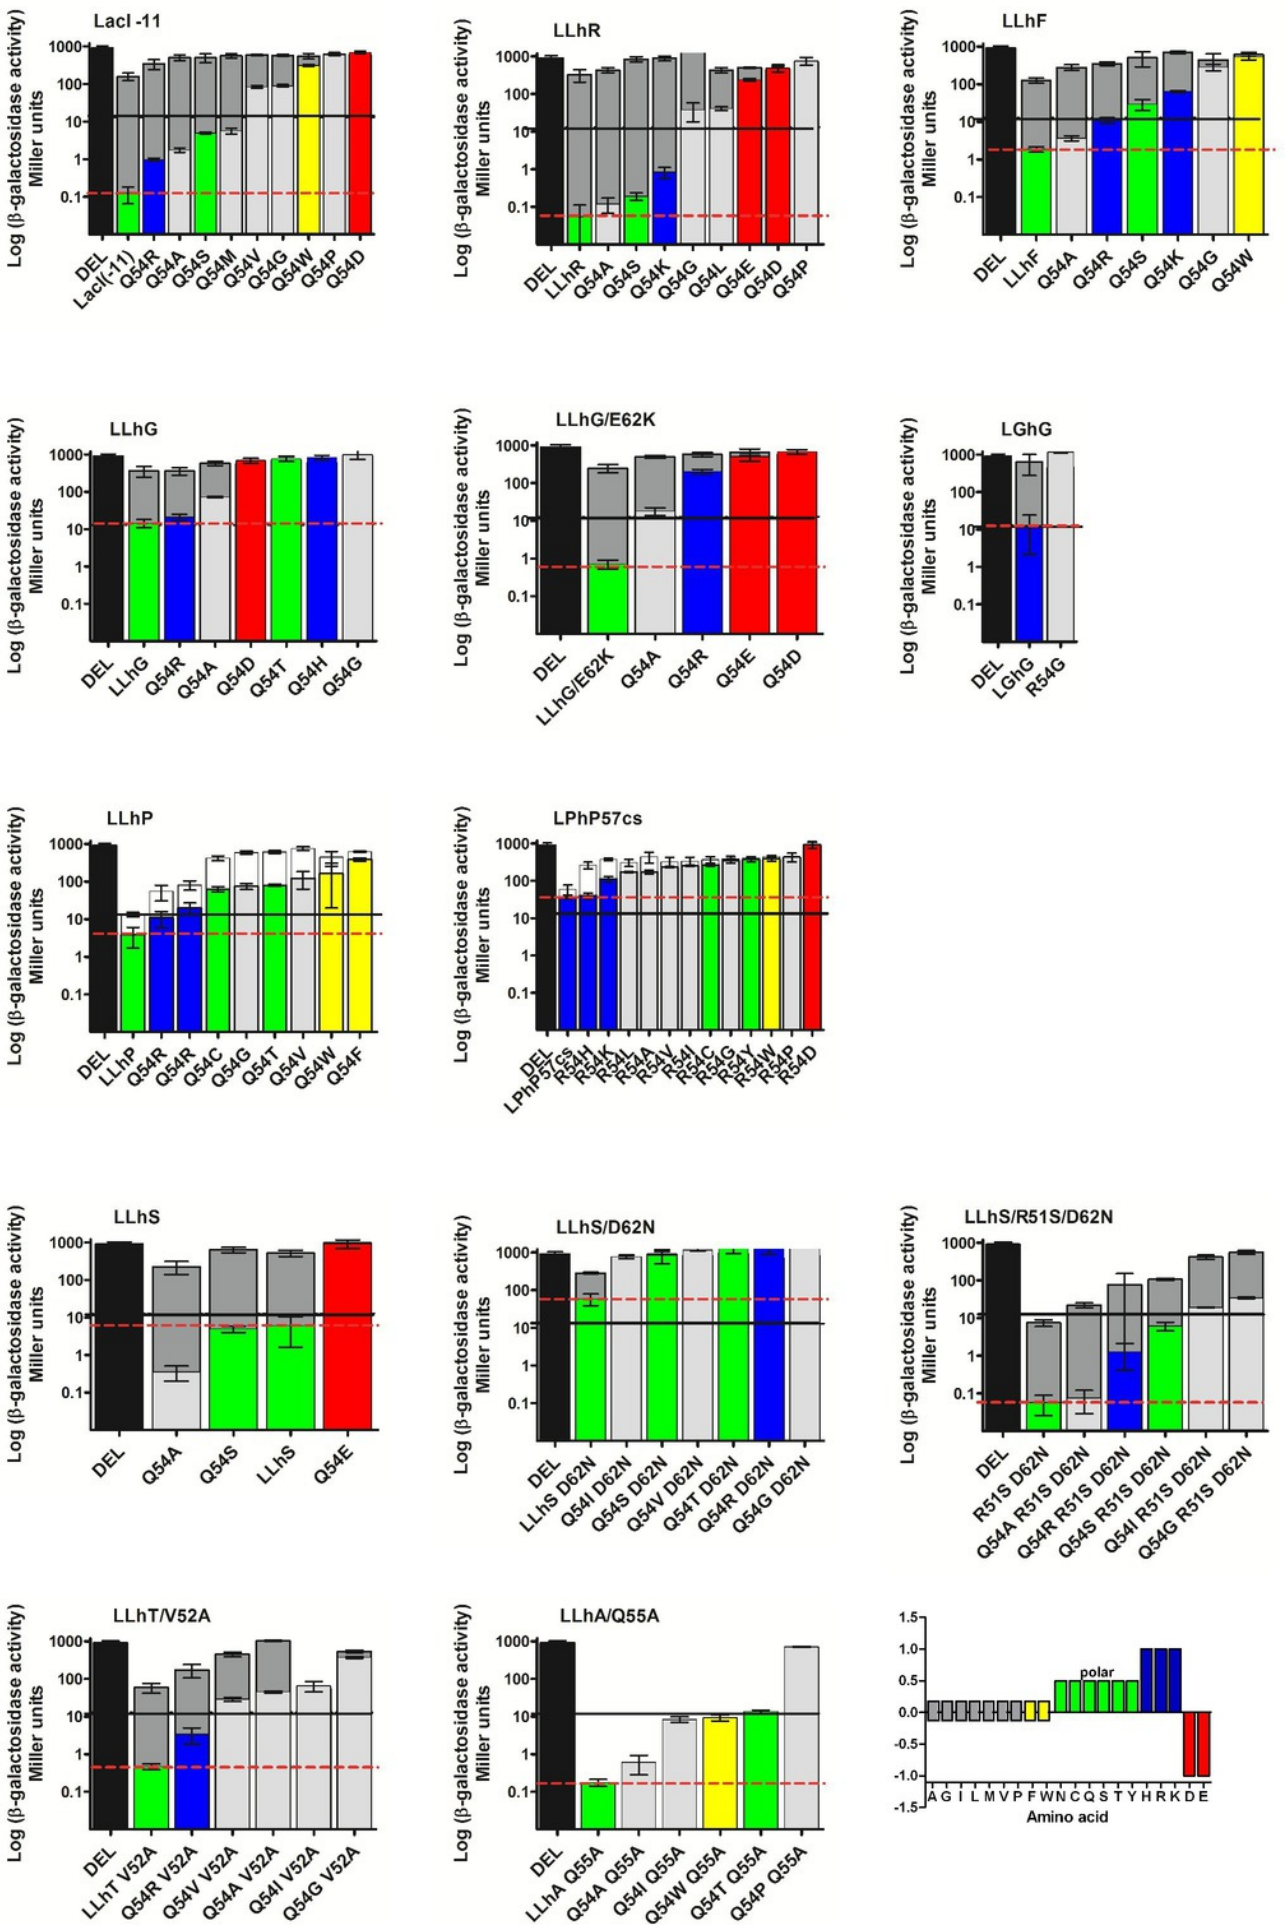

Figure S51: Physicochemical trends: Position 54, Charge/polarity/aromaticity

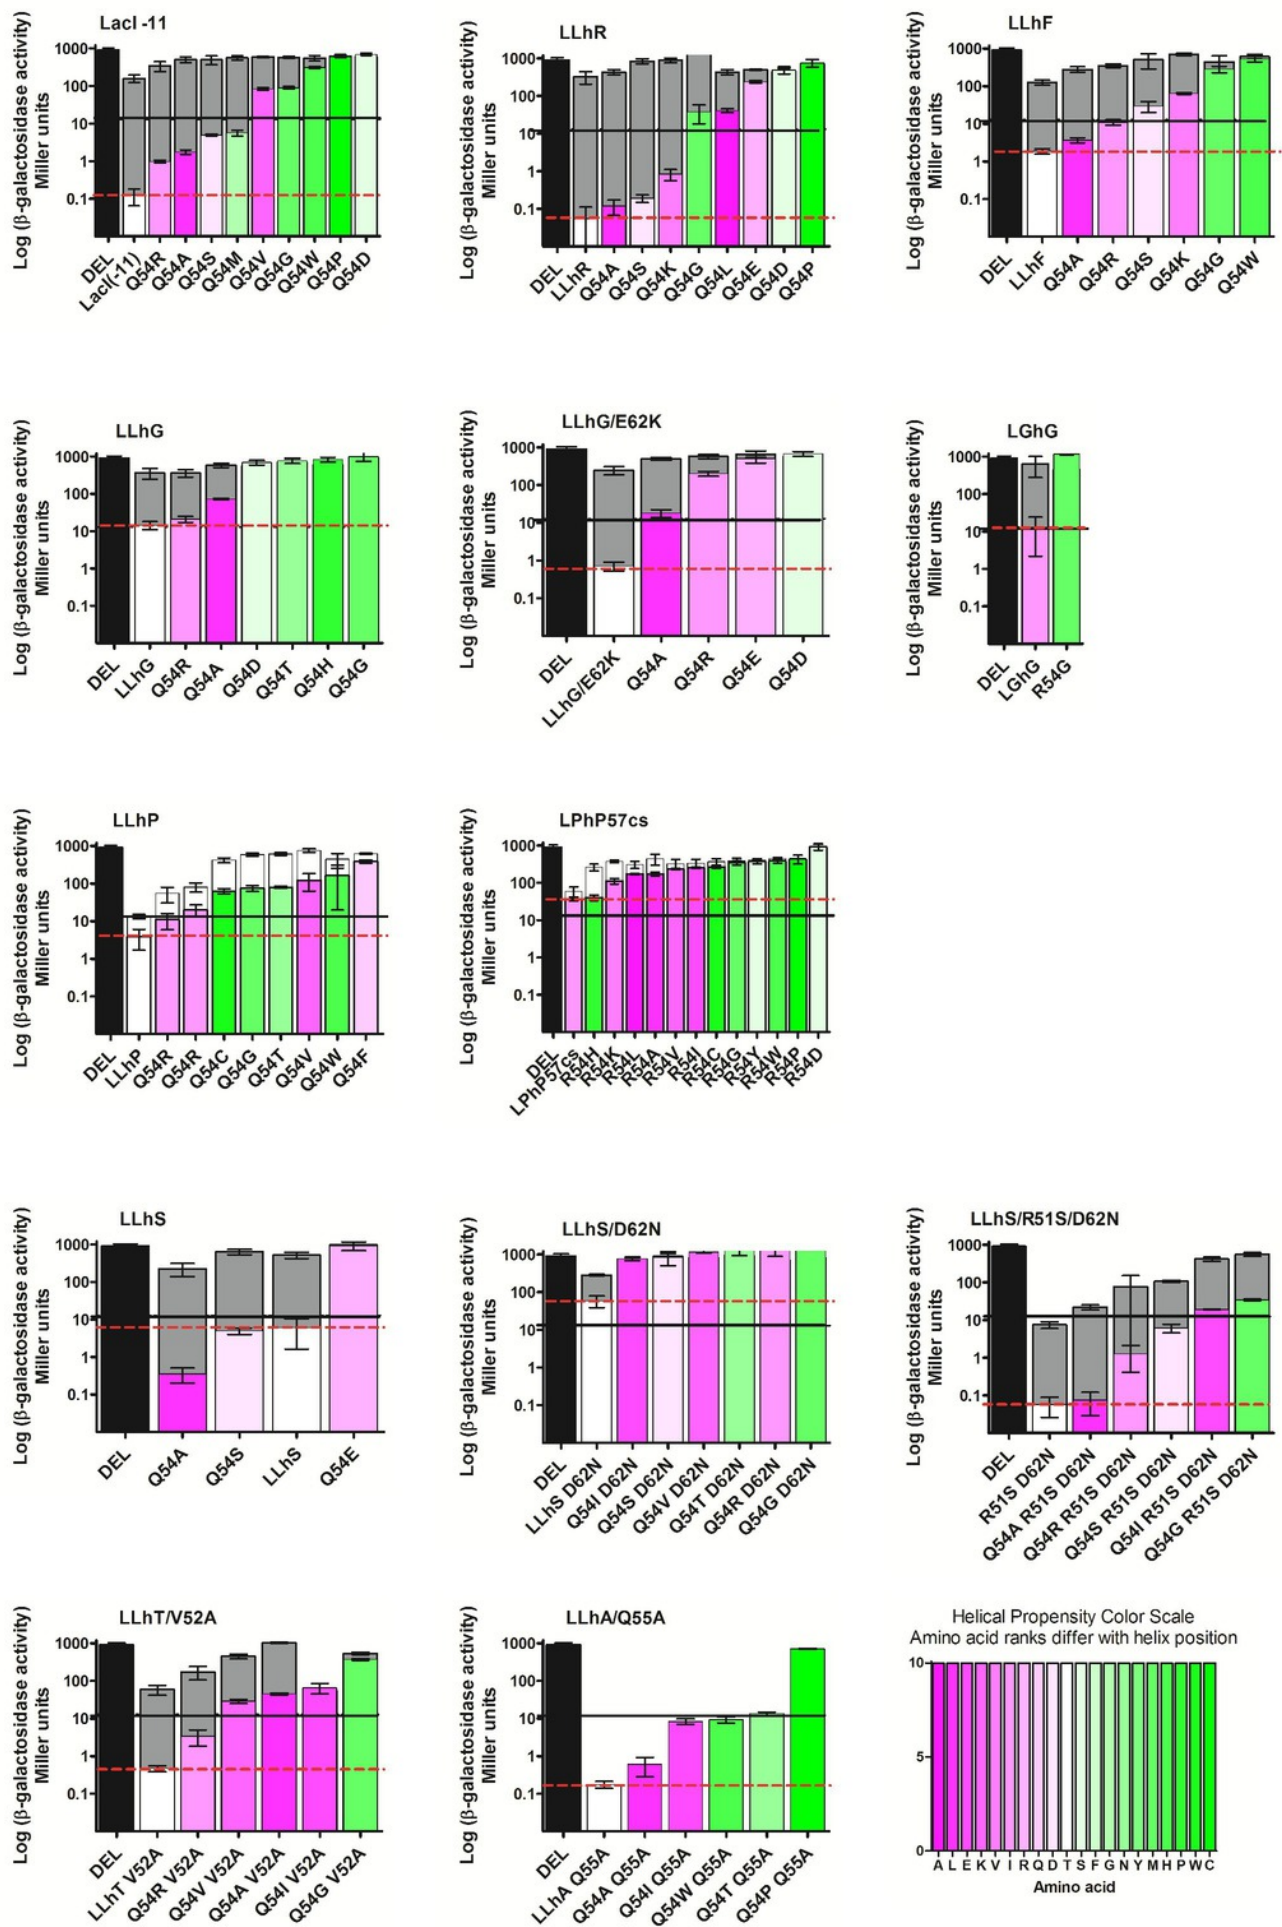

Figure S52: Physicochemical trends: Position 54, Helical propensity (C4 scale)





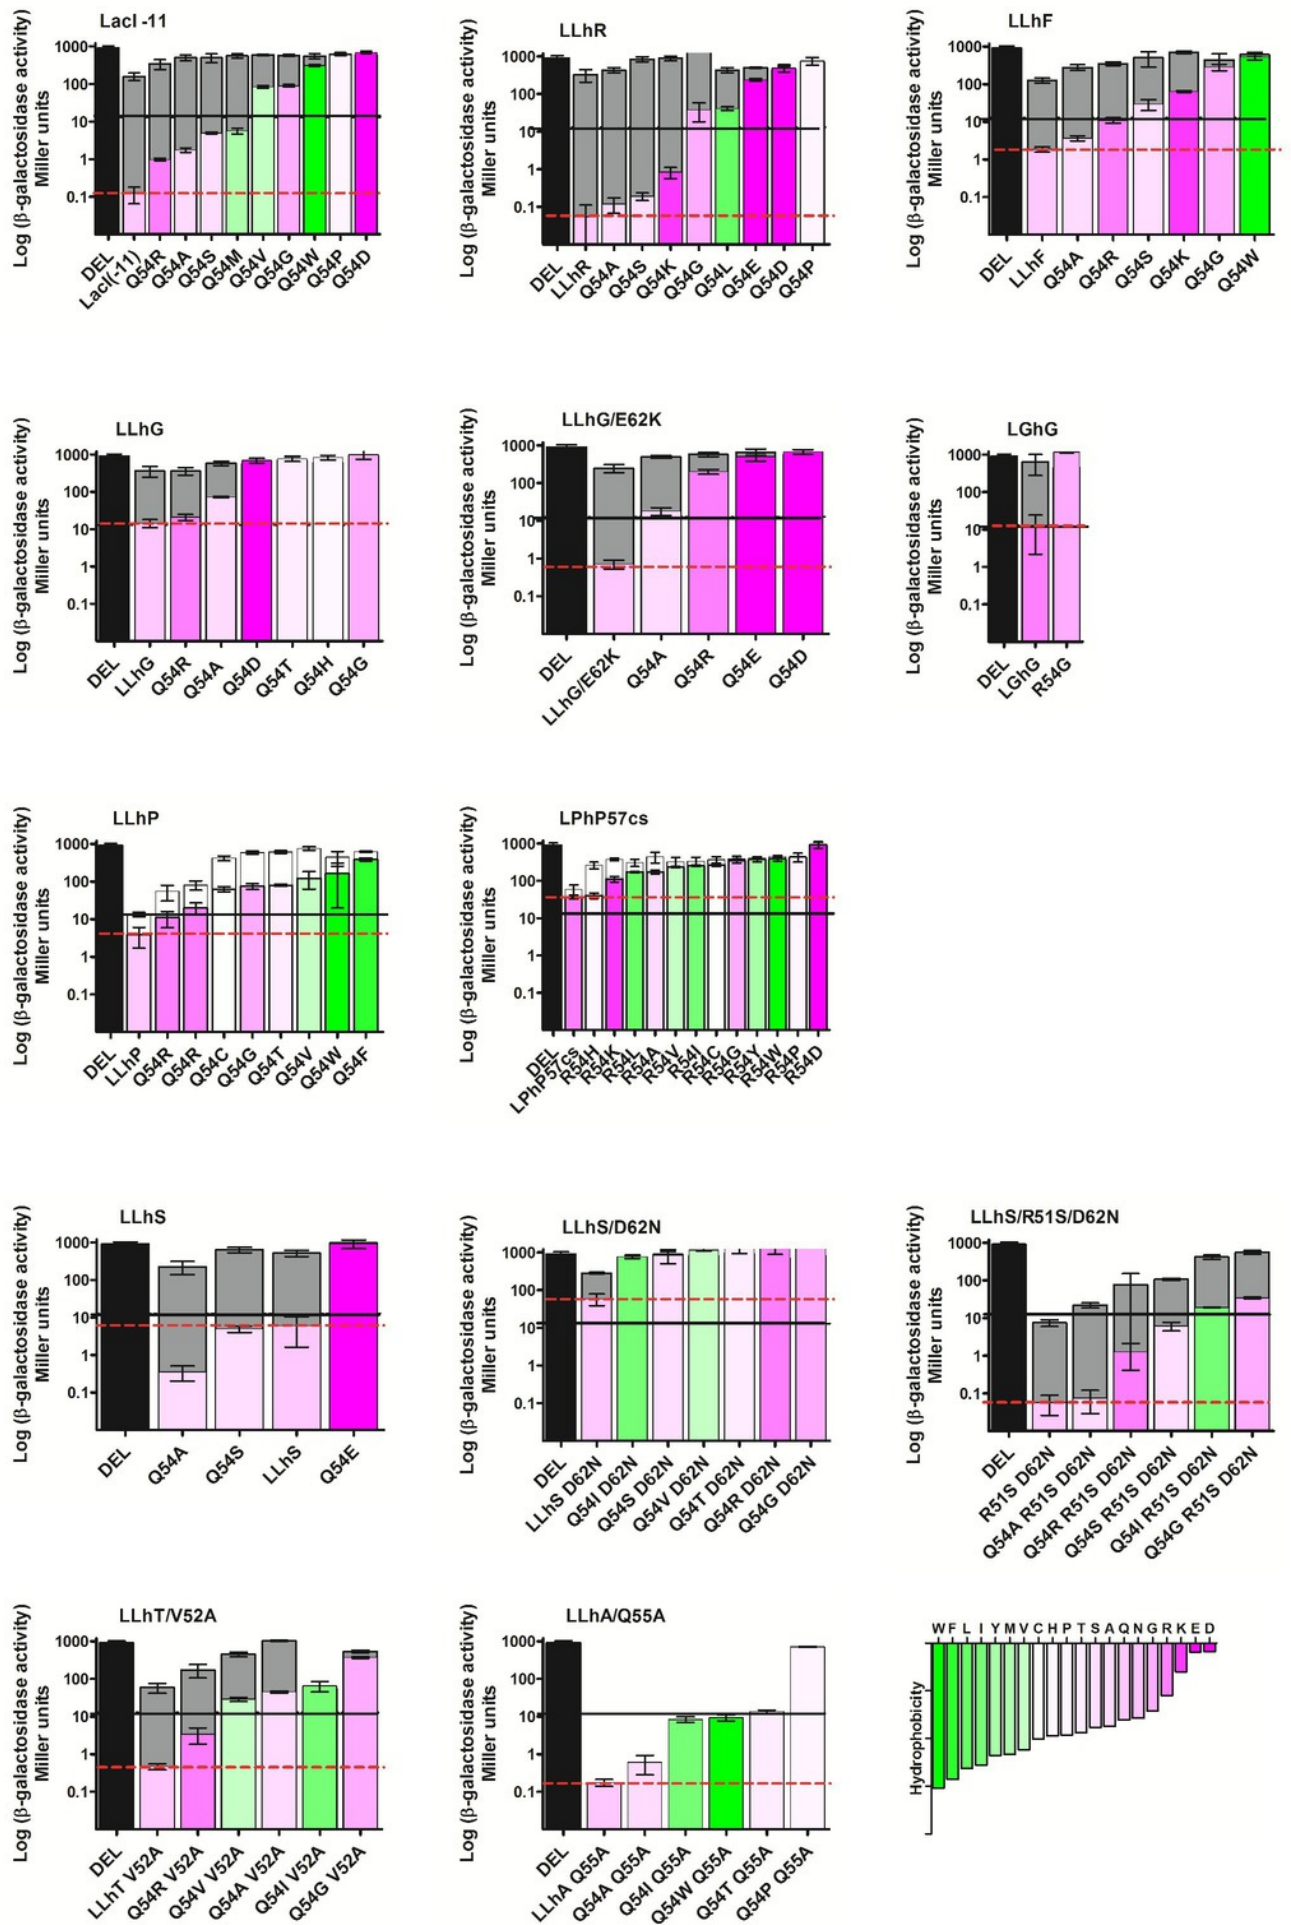

Figure S54: Physicochemical trends: Position 54, Hydrophobicity
