# Supplementary material for: Rheostats and Toggle Switches for Modulating Protein Function
Source: PubMed Central journal article supplement (PMC3875437; doi:10.1371/journal.pone.0083502), 2013-12-30
Supplement: pone.0083502.s006.pdf [file pone.0083502.s006.pdf]

Supplemental Material for:  
Rheostats and toggle switches for modulating protein function  
File 6: Physicochemical trends: Positions 55-59

Meinhardt, Manley, Parente and Swint-Kruse

**List of Figures**

|     |                                                                                      |    |
|-----|--------------------------------------------------------------------------------------|----|
| S55 | Physicochemical trends: Position 55, Accessible surface area . . . . .               | 3  |
| S56 | Physicochemical trends: Position 55, Side chain branching . . . . .                  | 4  |
| S57 | Physicochemical trends: Position 55, Charge/polarity/aromaticity . . . . .           | 5  |
| S58 | Physicochemical trends: Position 55, Helical propensity (C3 scale) . . . . .         | 6  |
| S59 | Physicochemical trends: Position 55, Helical propensity (C4 scale) . . . . .         | 7  |
| S60 | Physicochemical trends: Position 55, Hydrophobicity . . . . .                        | 8  |
| S61 | Physicochemical trends: Position 58, Accessible surface area . . . . .               | 9  |
| S62 | Physicochemical trends: Position 58, Side chain branching . . . . .                  | 10 |
| S63 | Physicochemical trends: Position 58, Charge/polarity/aromaticity . . . . .           | 11 |
| S64 | Physicochemical trends: Position 58, Helical propensity (C1 scale) . . . . .         | 12 |
| S65 | Physicochemical trends: Position 58, Helical propensity $C_{cap}$ scale) . . . . .   | 13 |
| S66 | Physicochemical trends: Position 58, Hydrophobicity . . . . .                        | 14 |
| S67 | Physicochemical trends: Position 59, Accessible surface area . . . . .               | 15 |
| S68 | Physicochemical trends: Position 59, Side chain branching . . . . .                  | 16 |
| S69 | Physicochemical trends: Position 59, Charge/polarity/aromaticity . . . . .           | 17 |
| S70 | Physicochemical trends: Position 59, Helical propensity ( $C'$ scale) . . . . .      | 18 |
| S71 | Physicochemical trends: Position 59, Helical propensity ( $C_{cap}$ scale) . . . . . | 19 |
| S72 | Physicochemical trends: Position 59, Hydrophobicity . . . . .                        | 20 |

**Figures S55-S72.** Physico-chemical trends: positions 55-59. Repression assay data for each position were color-coded according to various physico-chemical scales. For example, Figures S55-S57 show results for position 55 color-coded by accessible surface area of the free side chain [46], side chain branching, and charge/polarity/aromaticity. The relevant parameter can be determined from the legend in the lower right hand corner of each graph. Positions 50-58 have potential to participate in an alpha helix, and repression assay results were also compared to both average and position-specific helical propensities [47]. For simplicity, only one helix color scale is used as a legend, with magenta corresponding to high propensity and green corresponding to low propensity. Since wild-type LacI and PurR have different length helices [20], we compared multiple helical scales to results for each position. However, no scale showed good correlation with the functional assay among all chimeras.

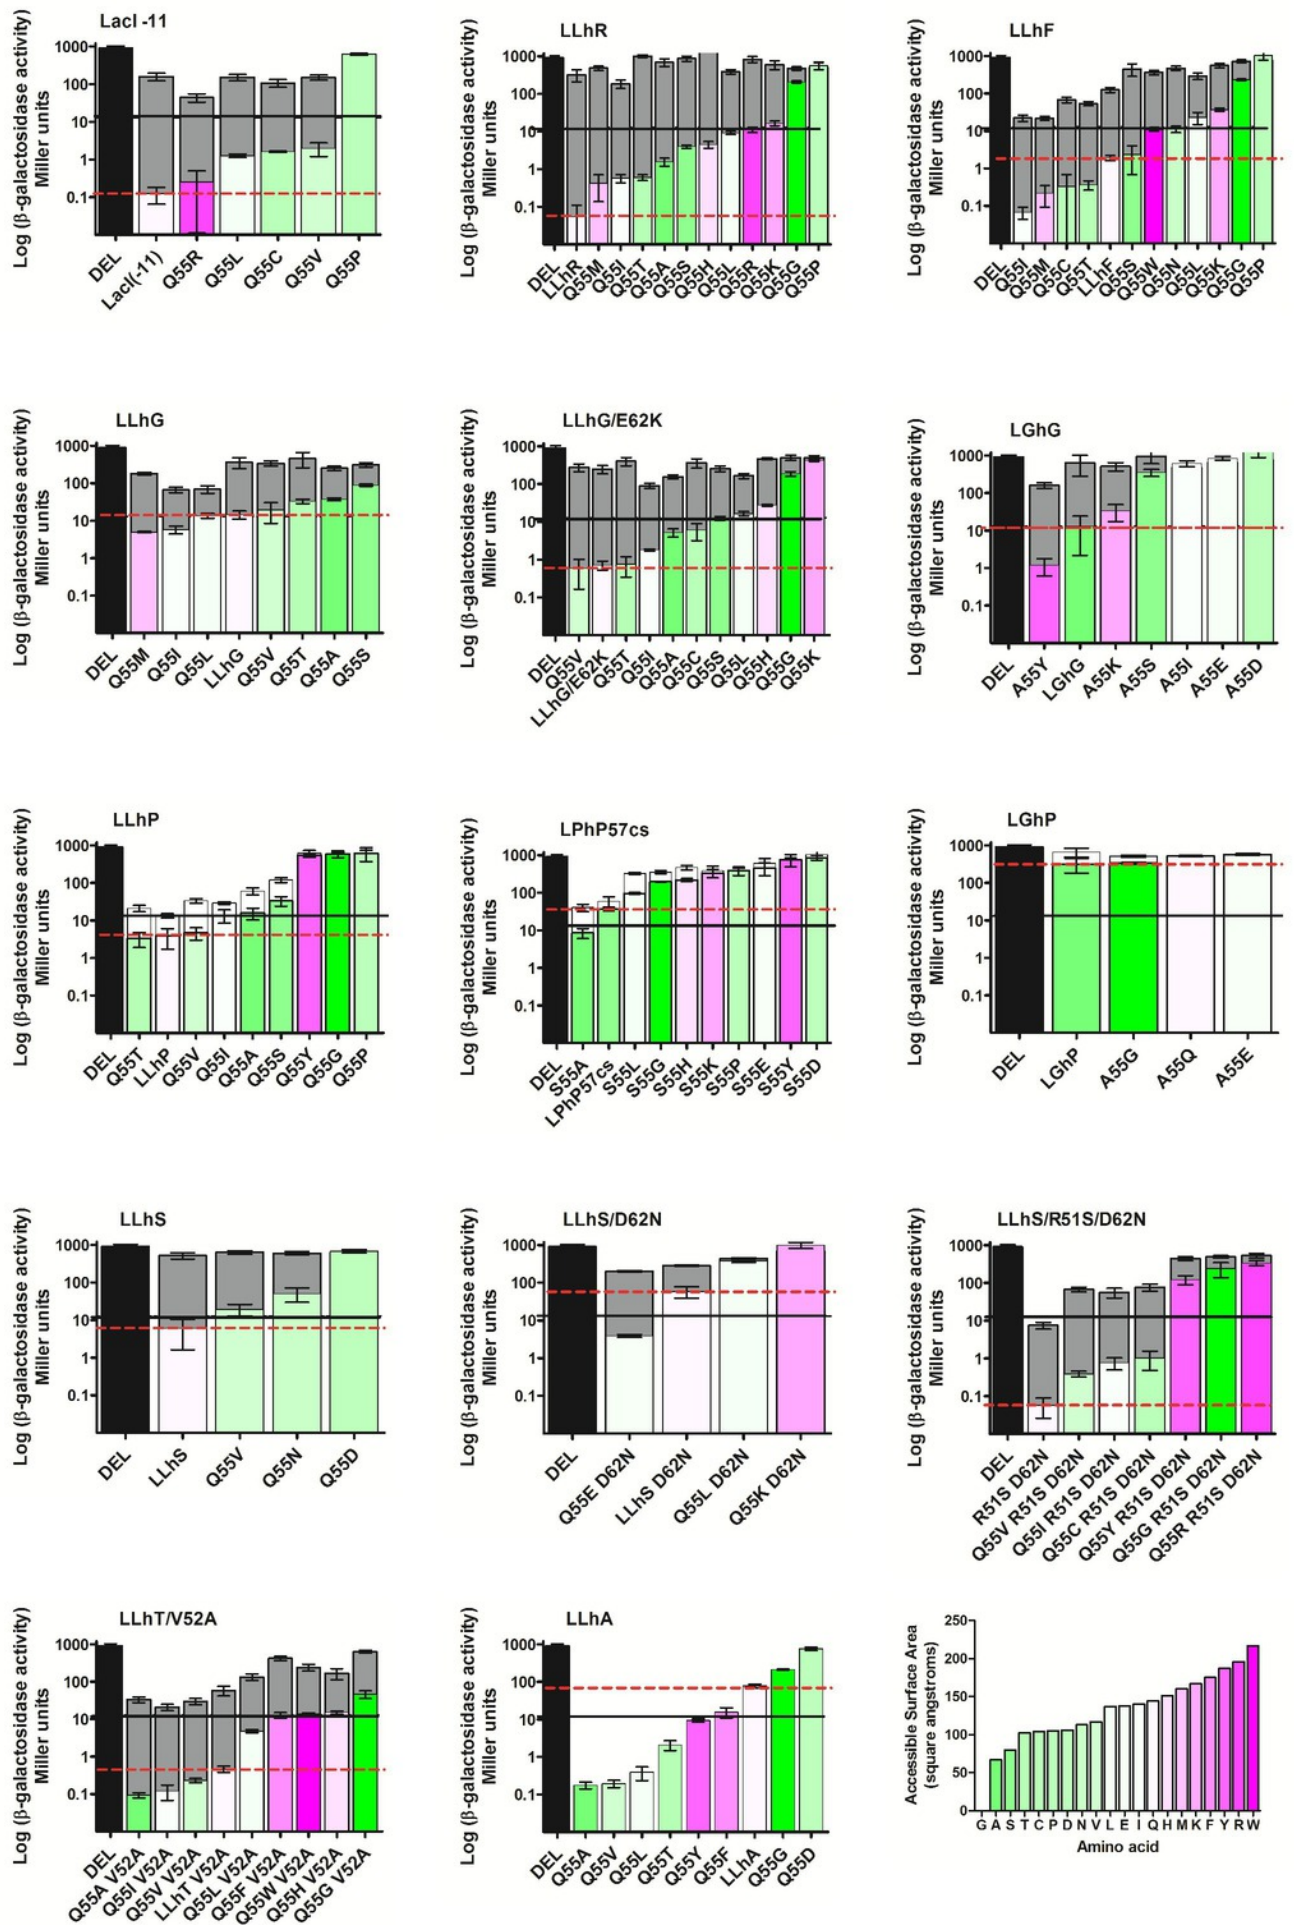

Figure S55: Physicochemical trends: Position 55, Accessible surface area

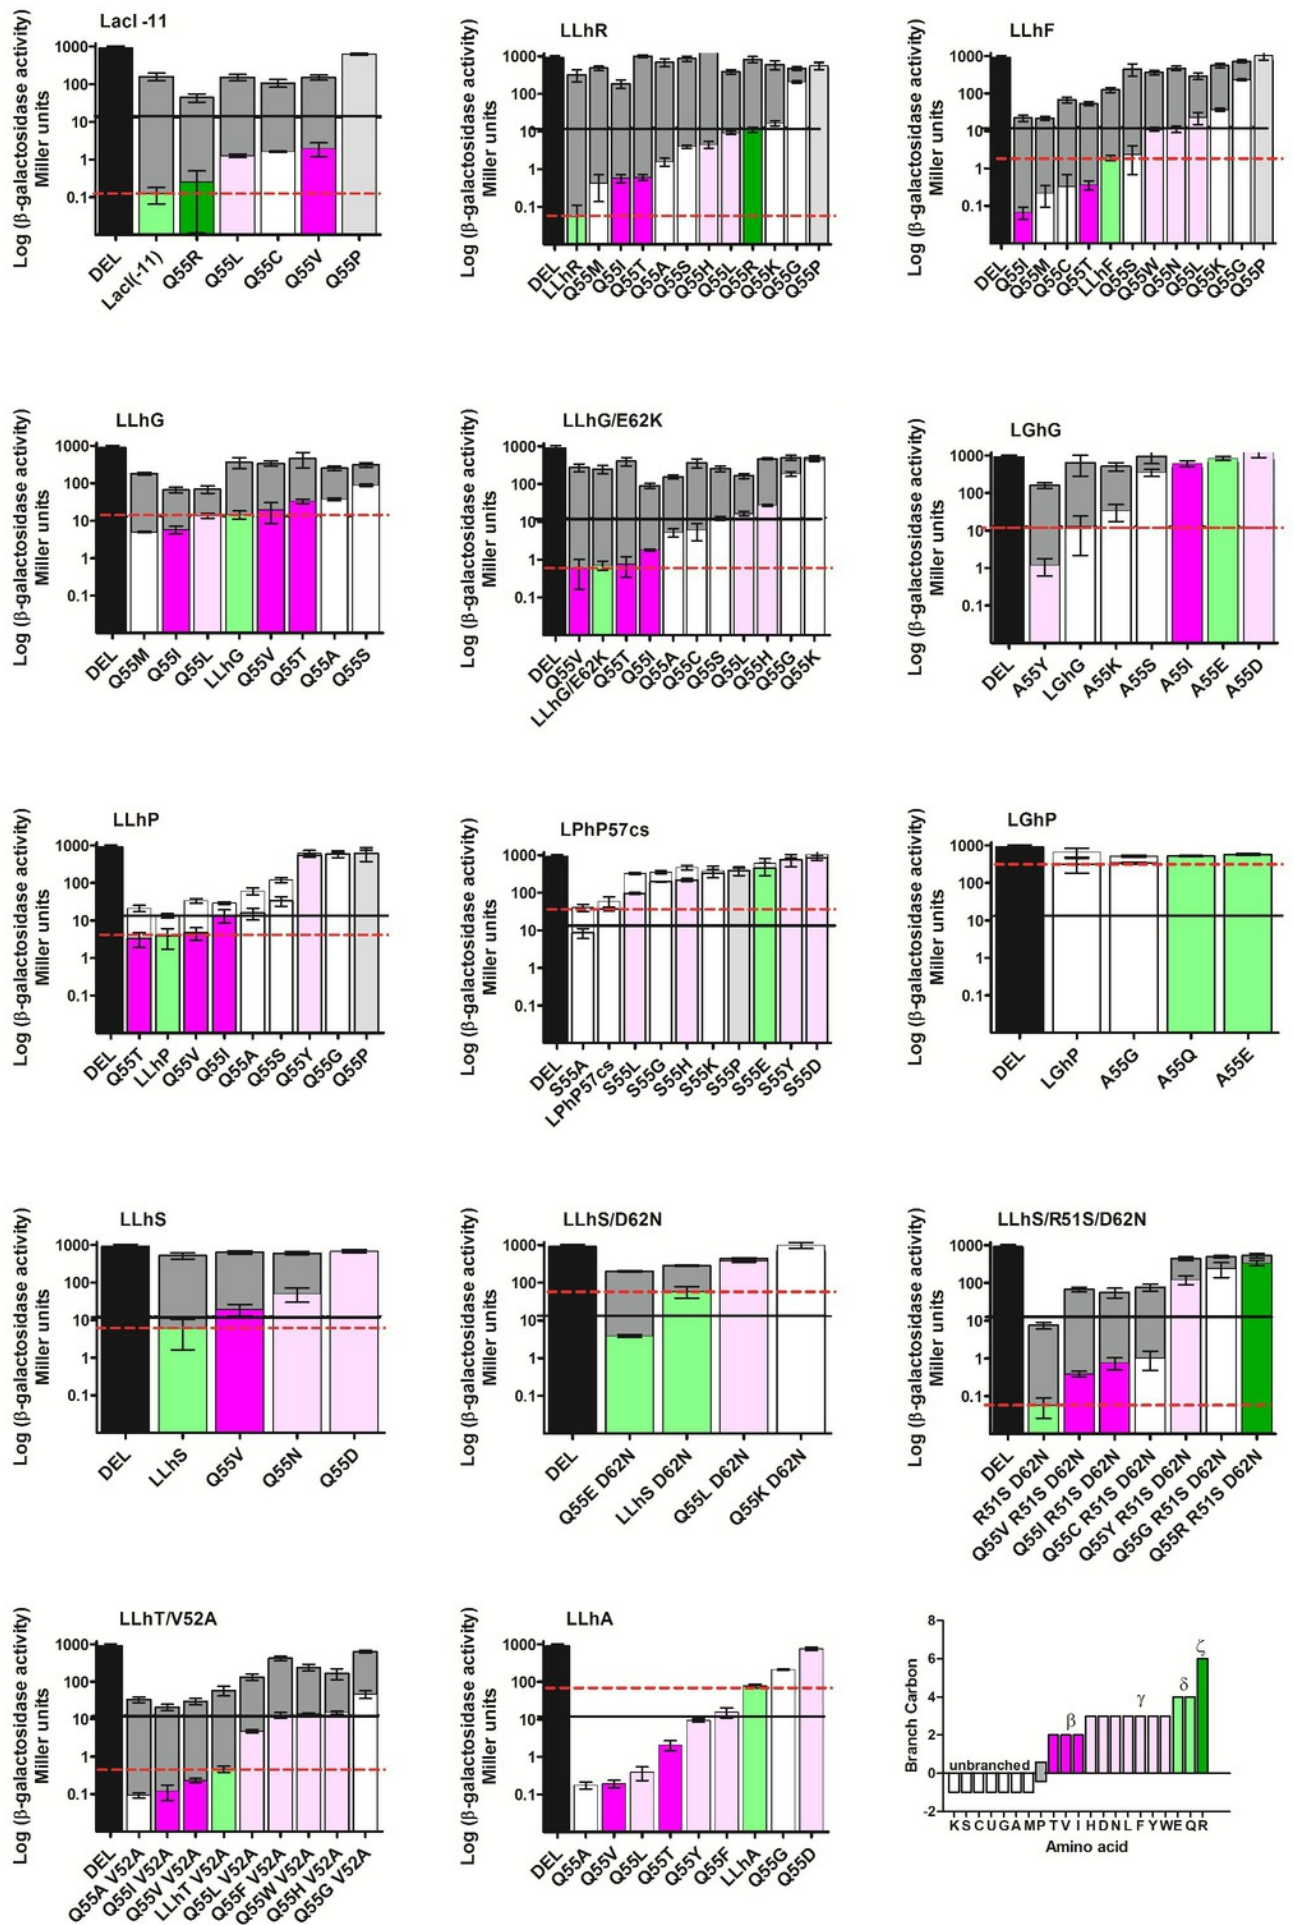

Figure S56: Physicochemical trends: Position 55, Side chain branching

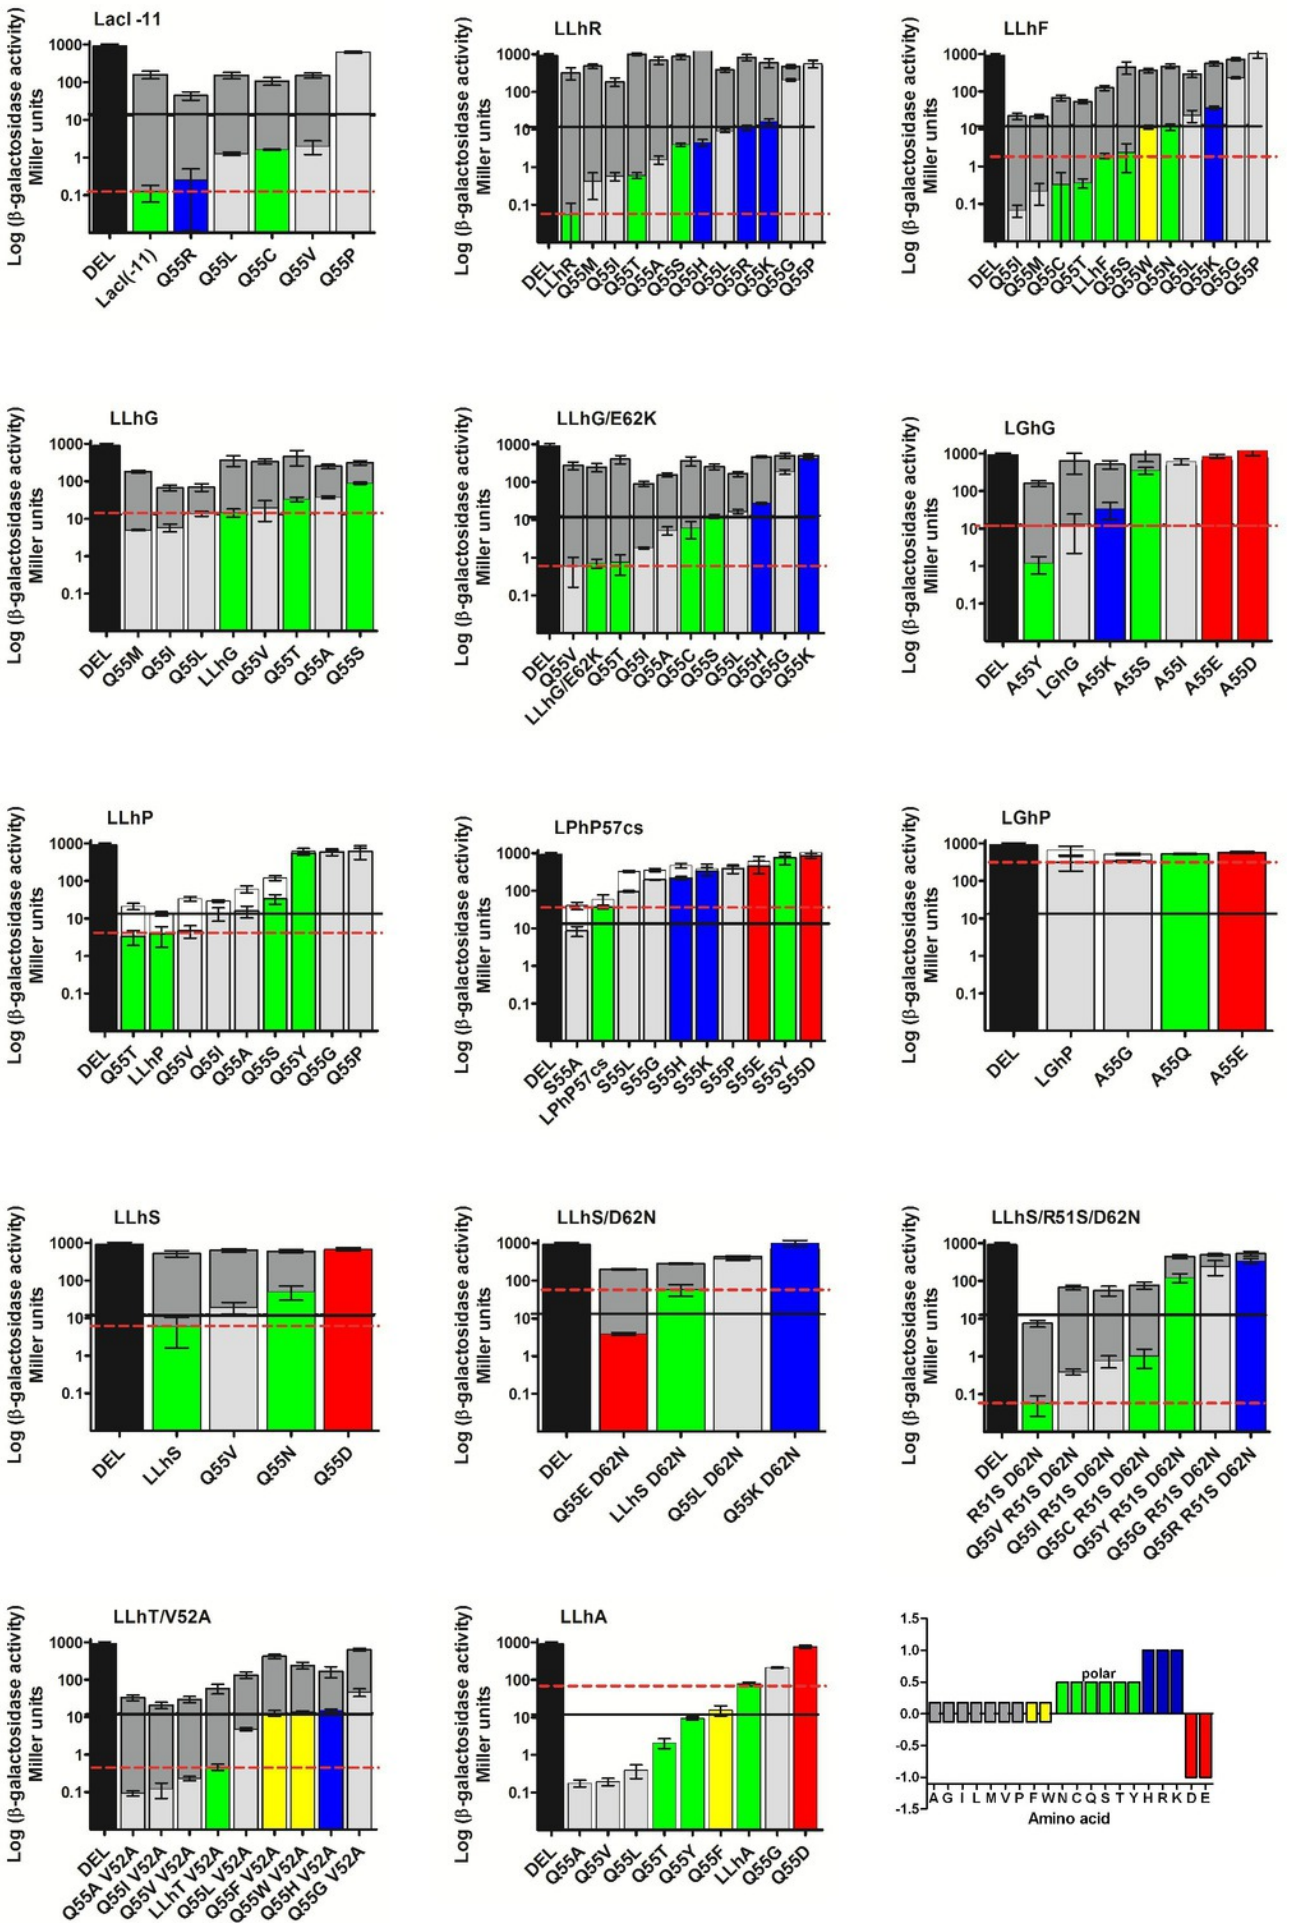

Figure S57: Physicochemical trends: Position 55, Charge/polarity/aromaticity

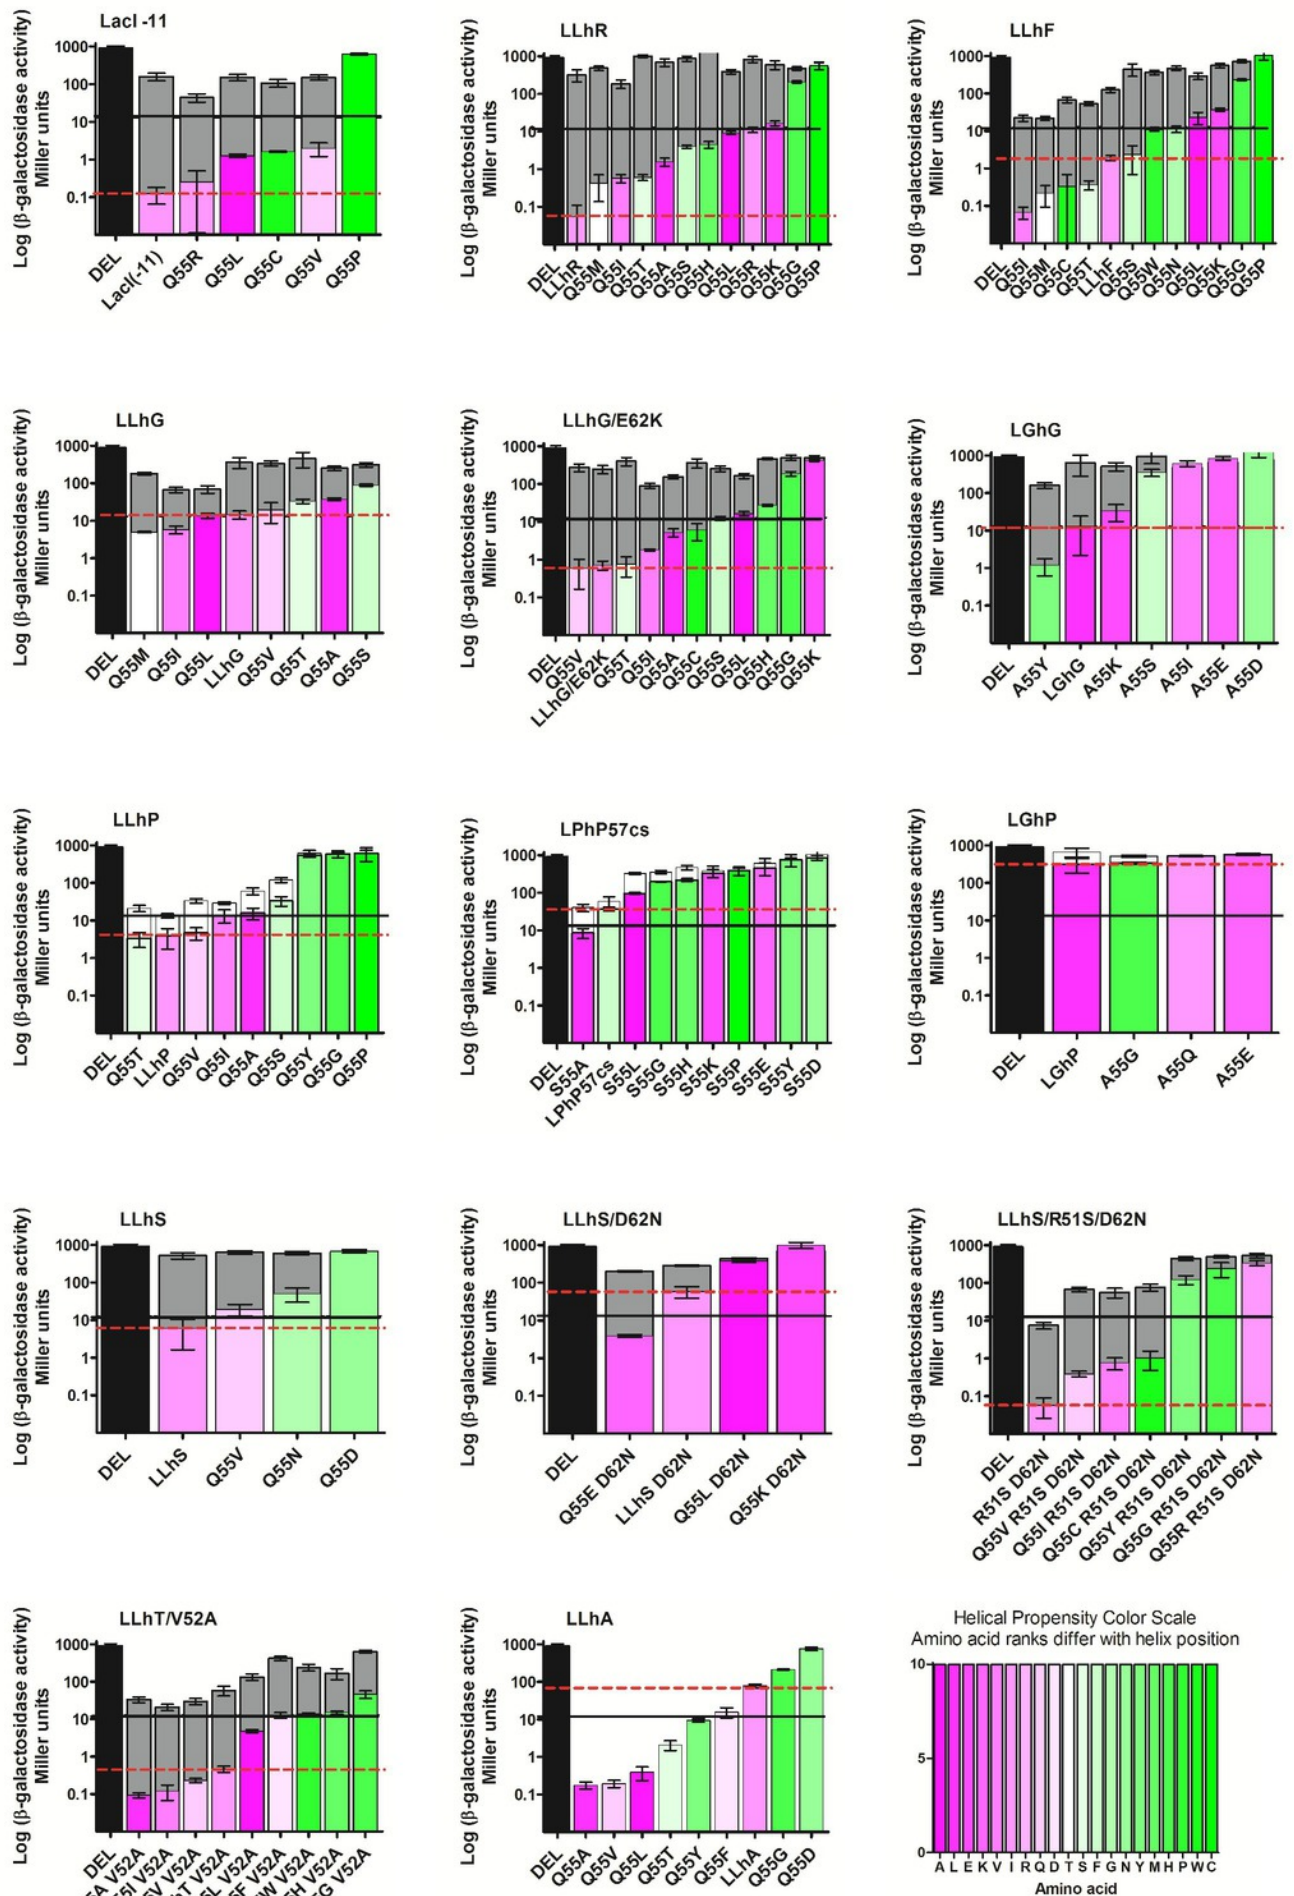

Figure S58: Physicochemical trends: Position 55, Helical propensity (C3 scale)

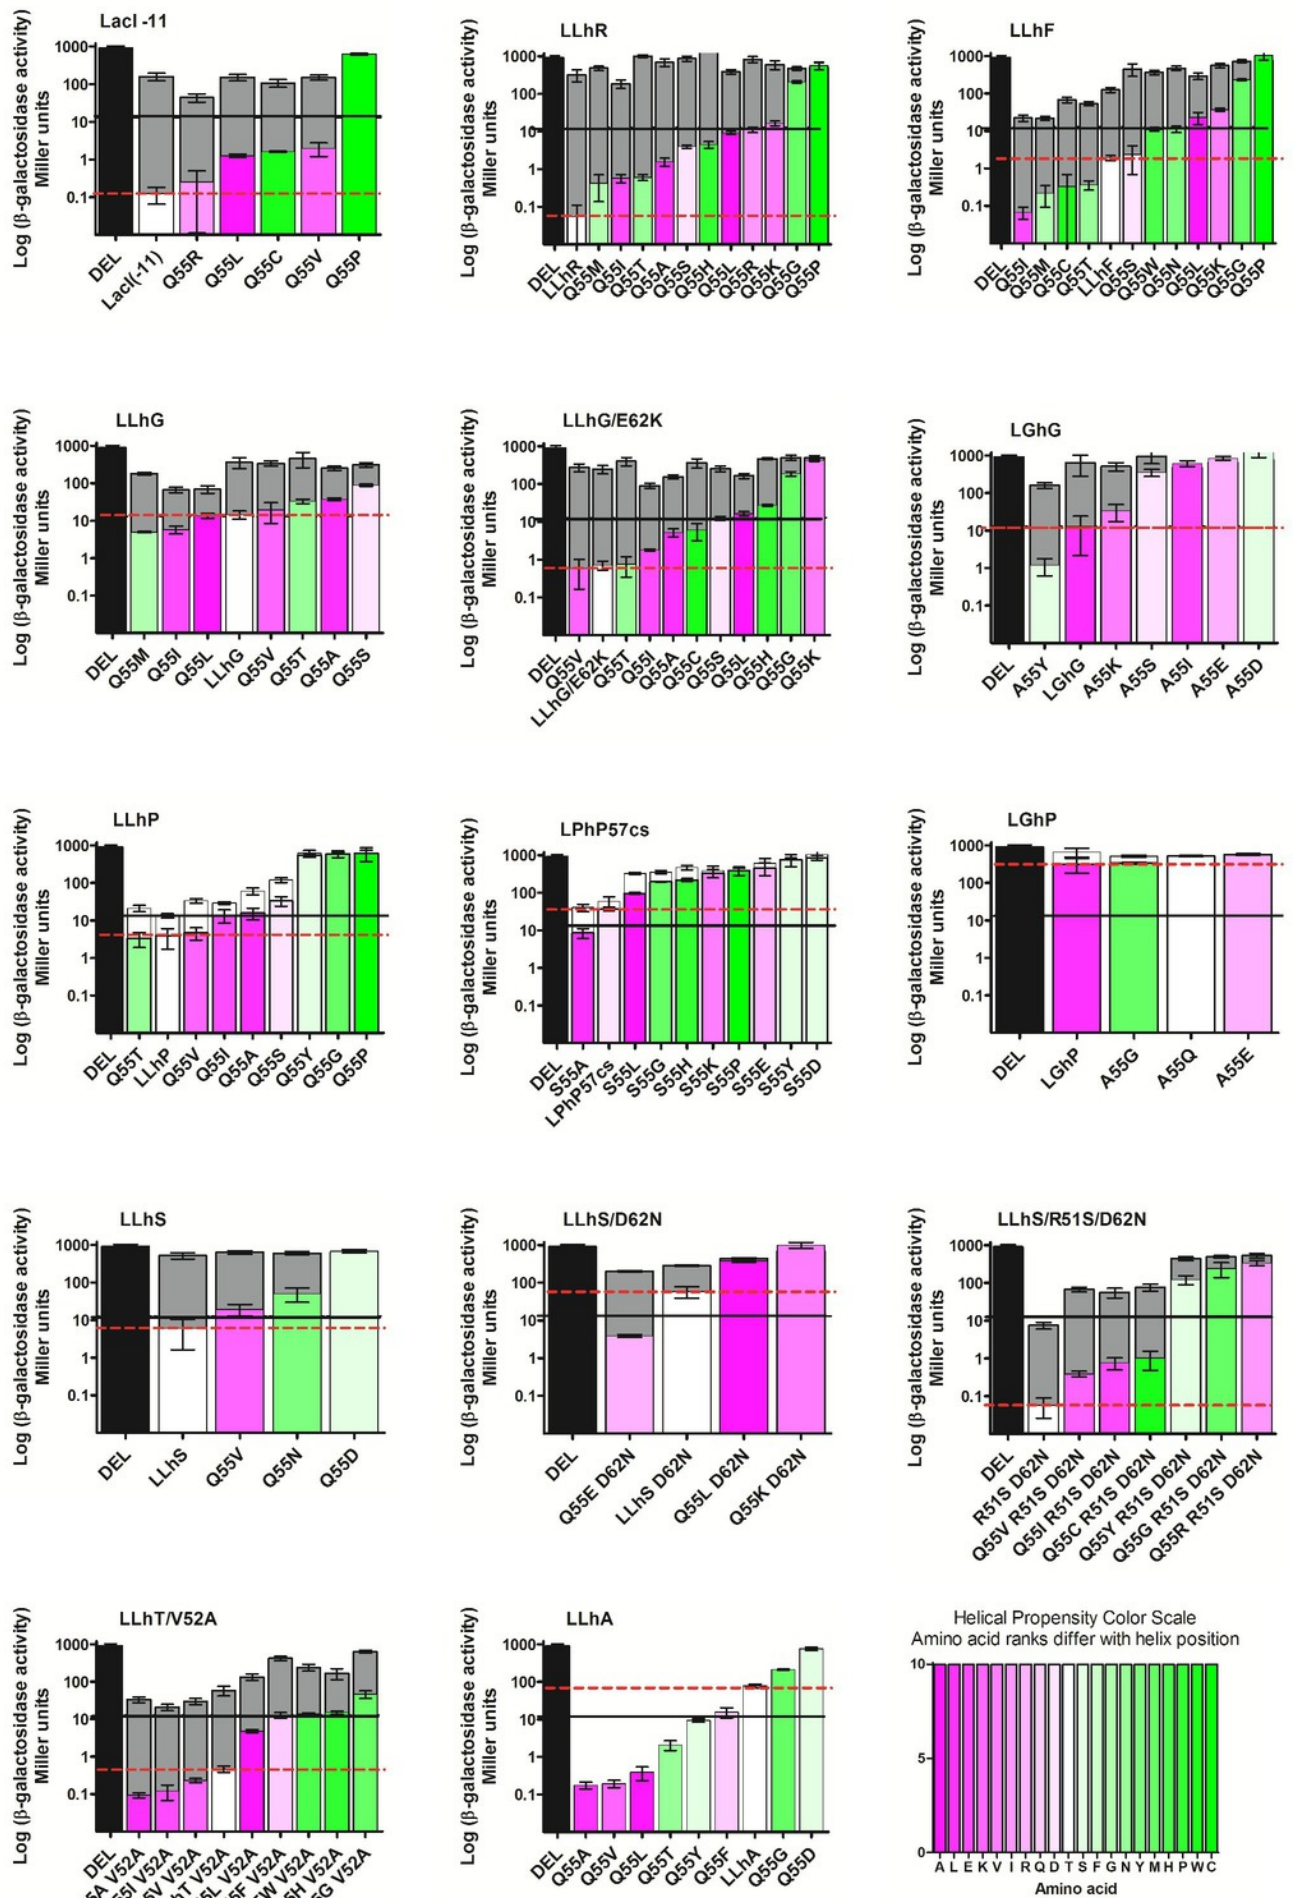

Figure S59: Physicochemical trends: Position 55, Helical propensity (C4 scale)

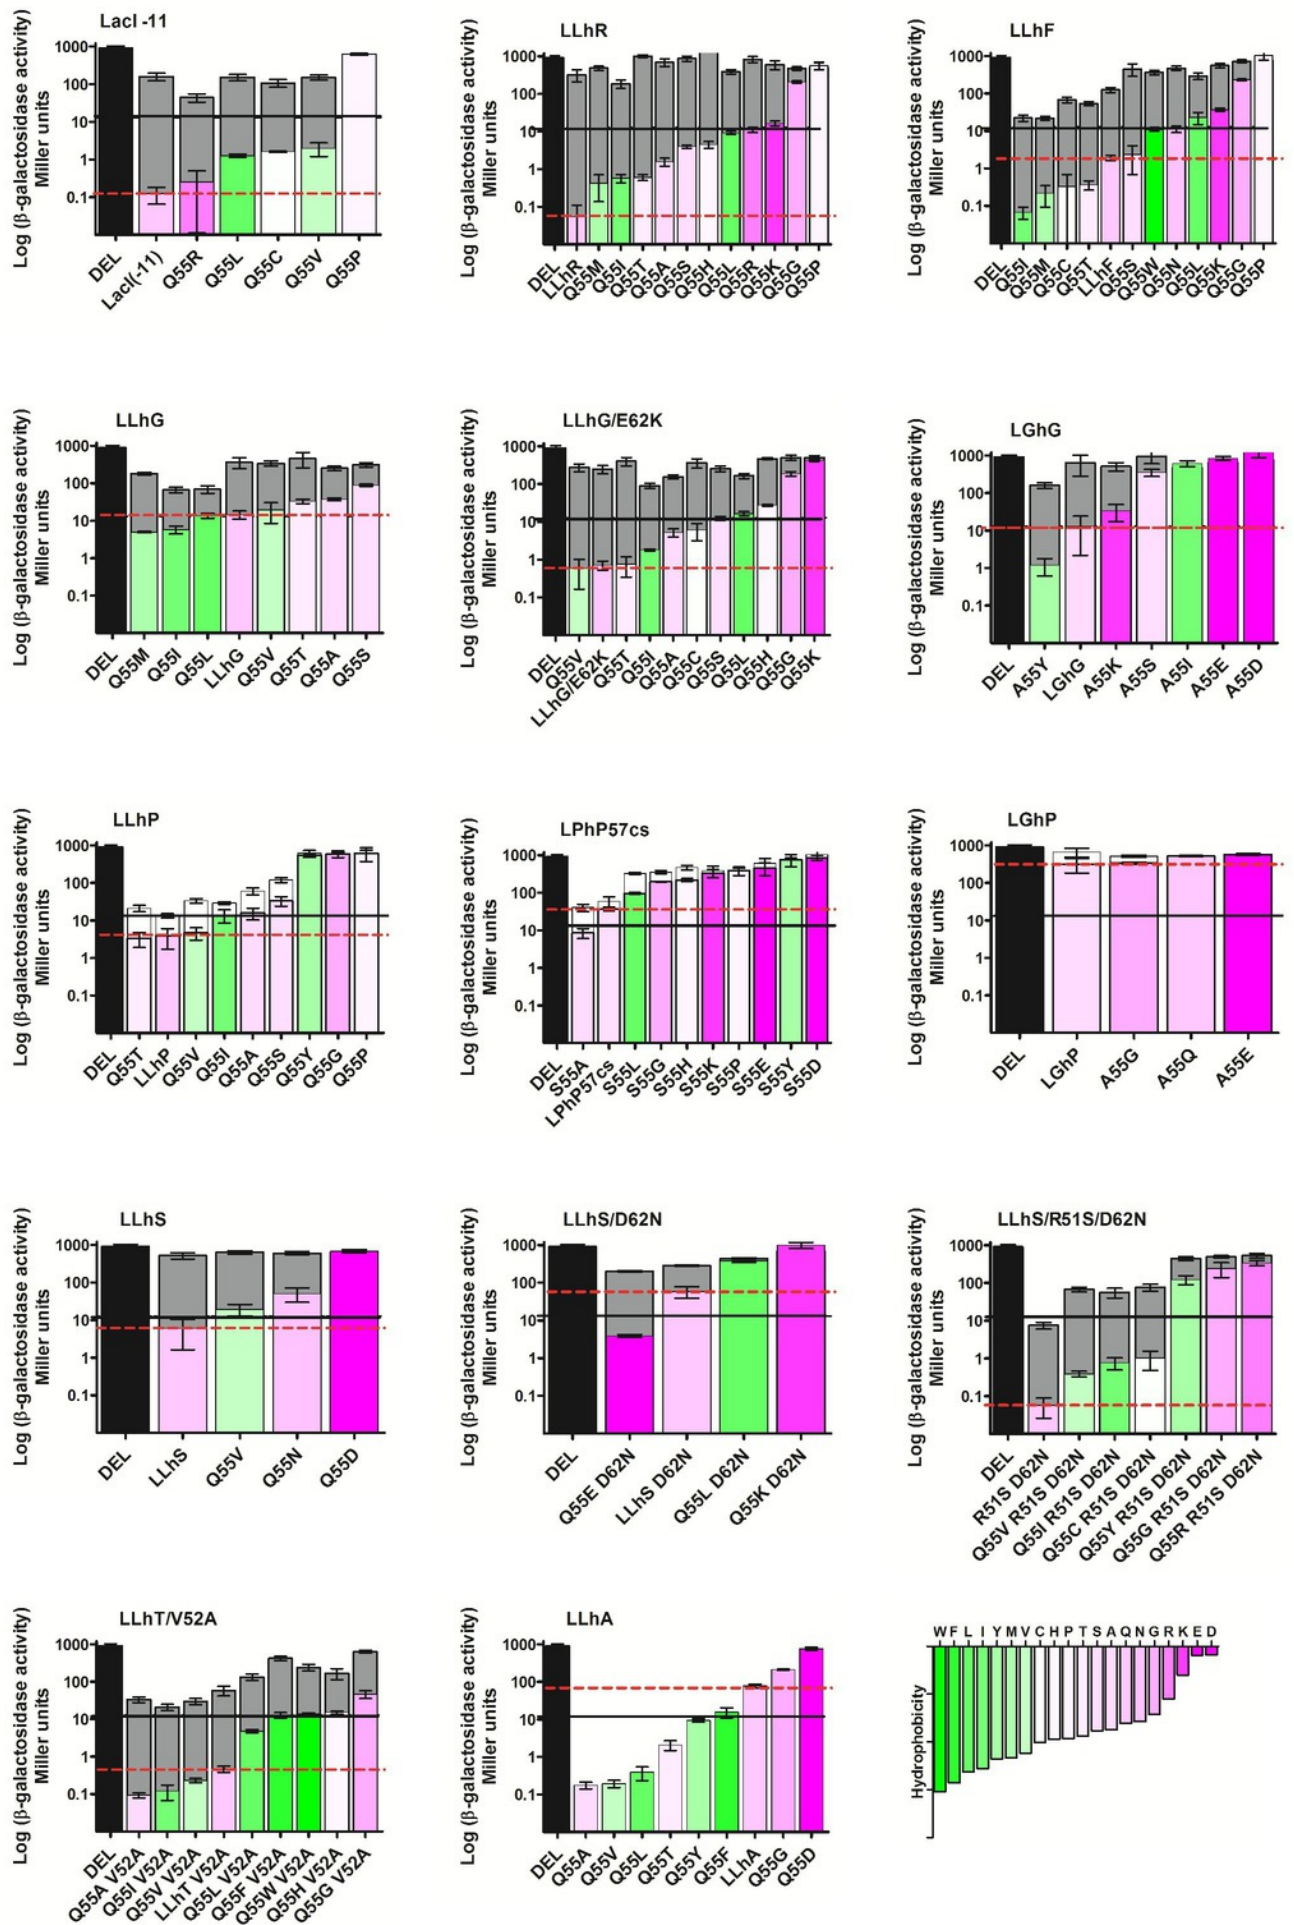

Figure S60: Physicochemical trends: Position 55, Hydrophobicity



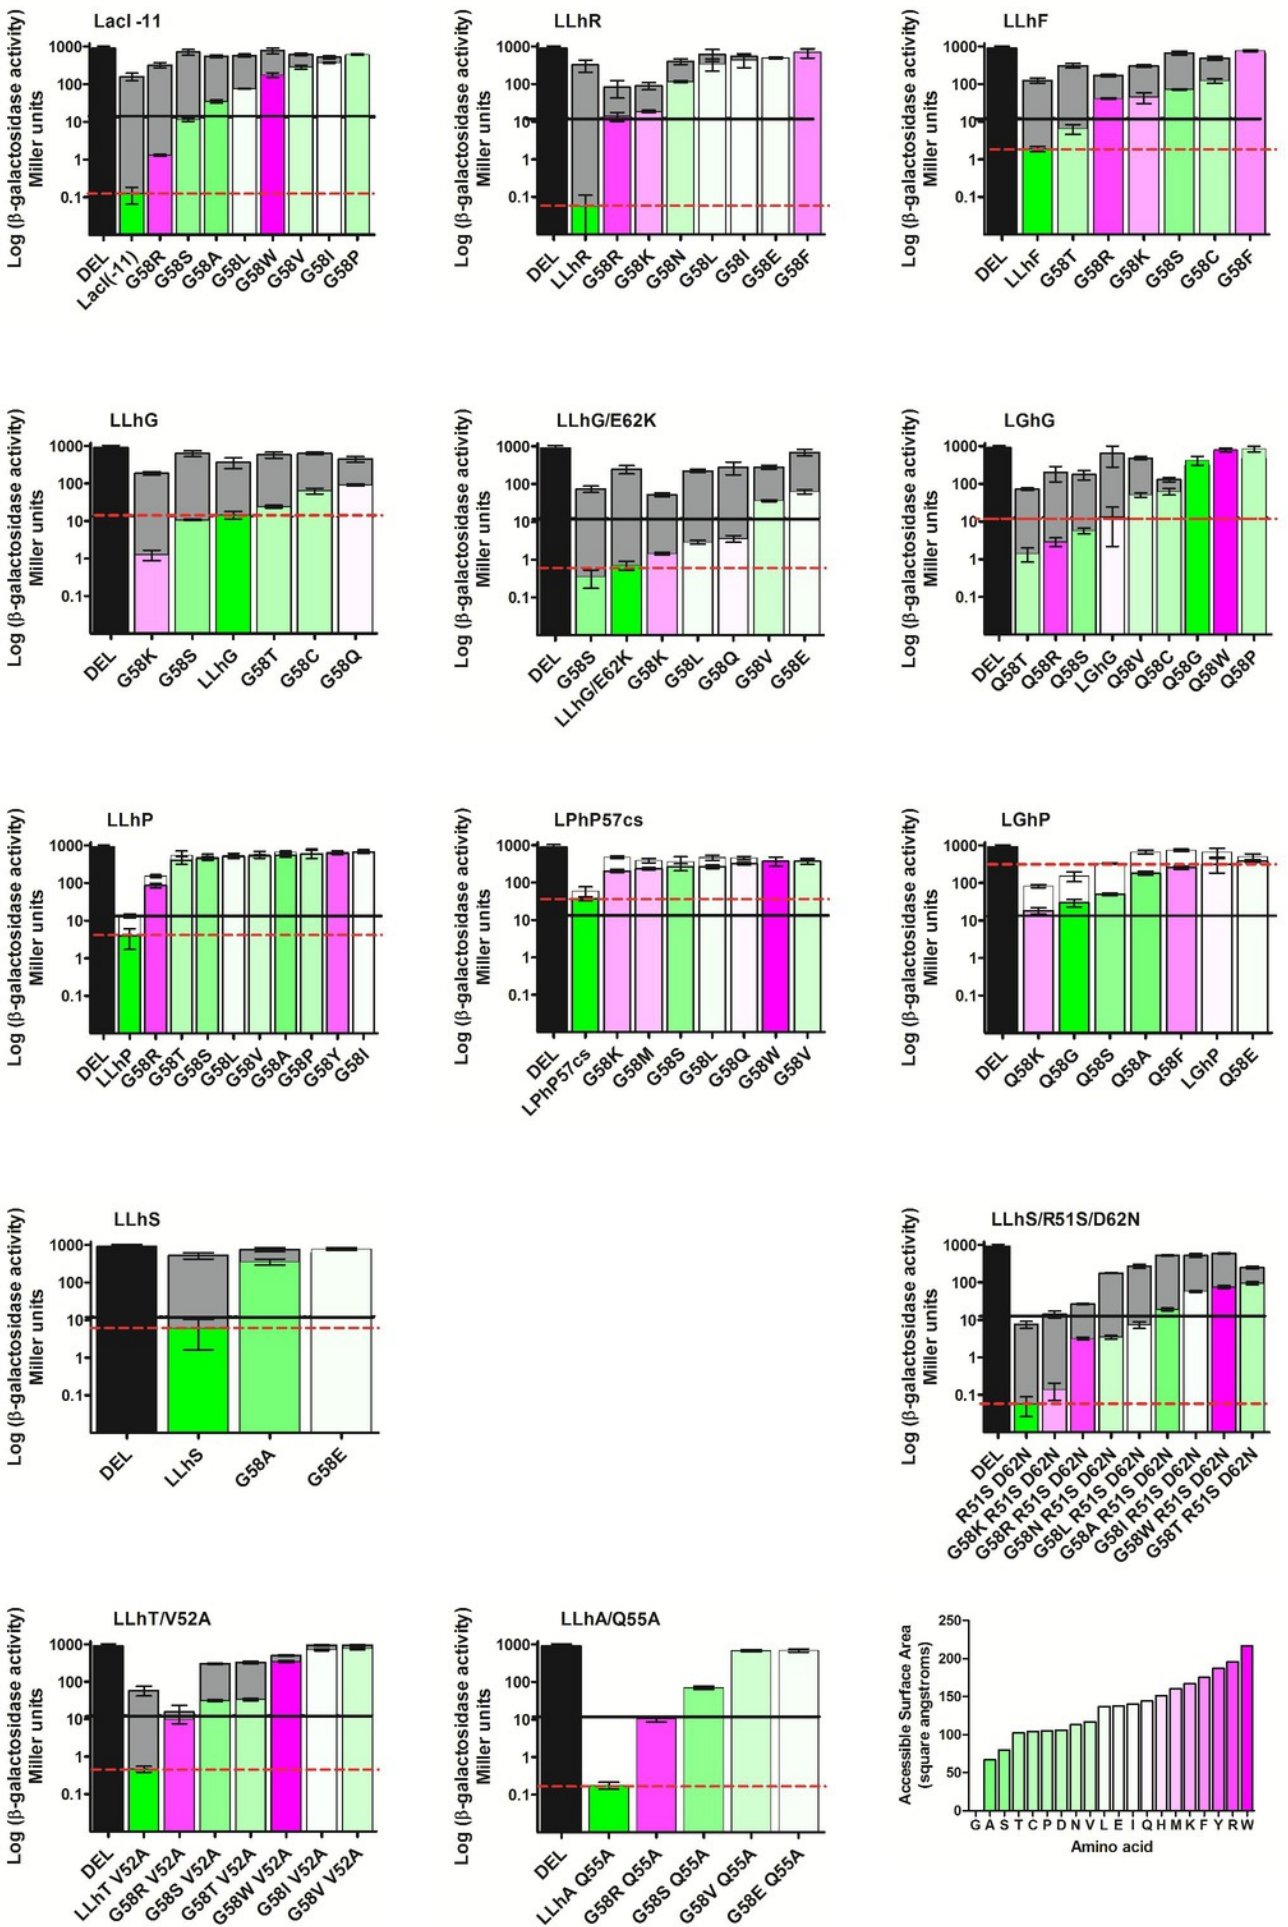

Figure S61: Physicochemical trends: Position 58, Accessible surface area

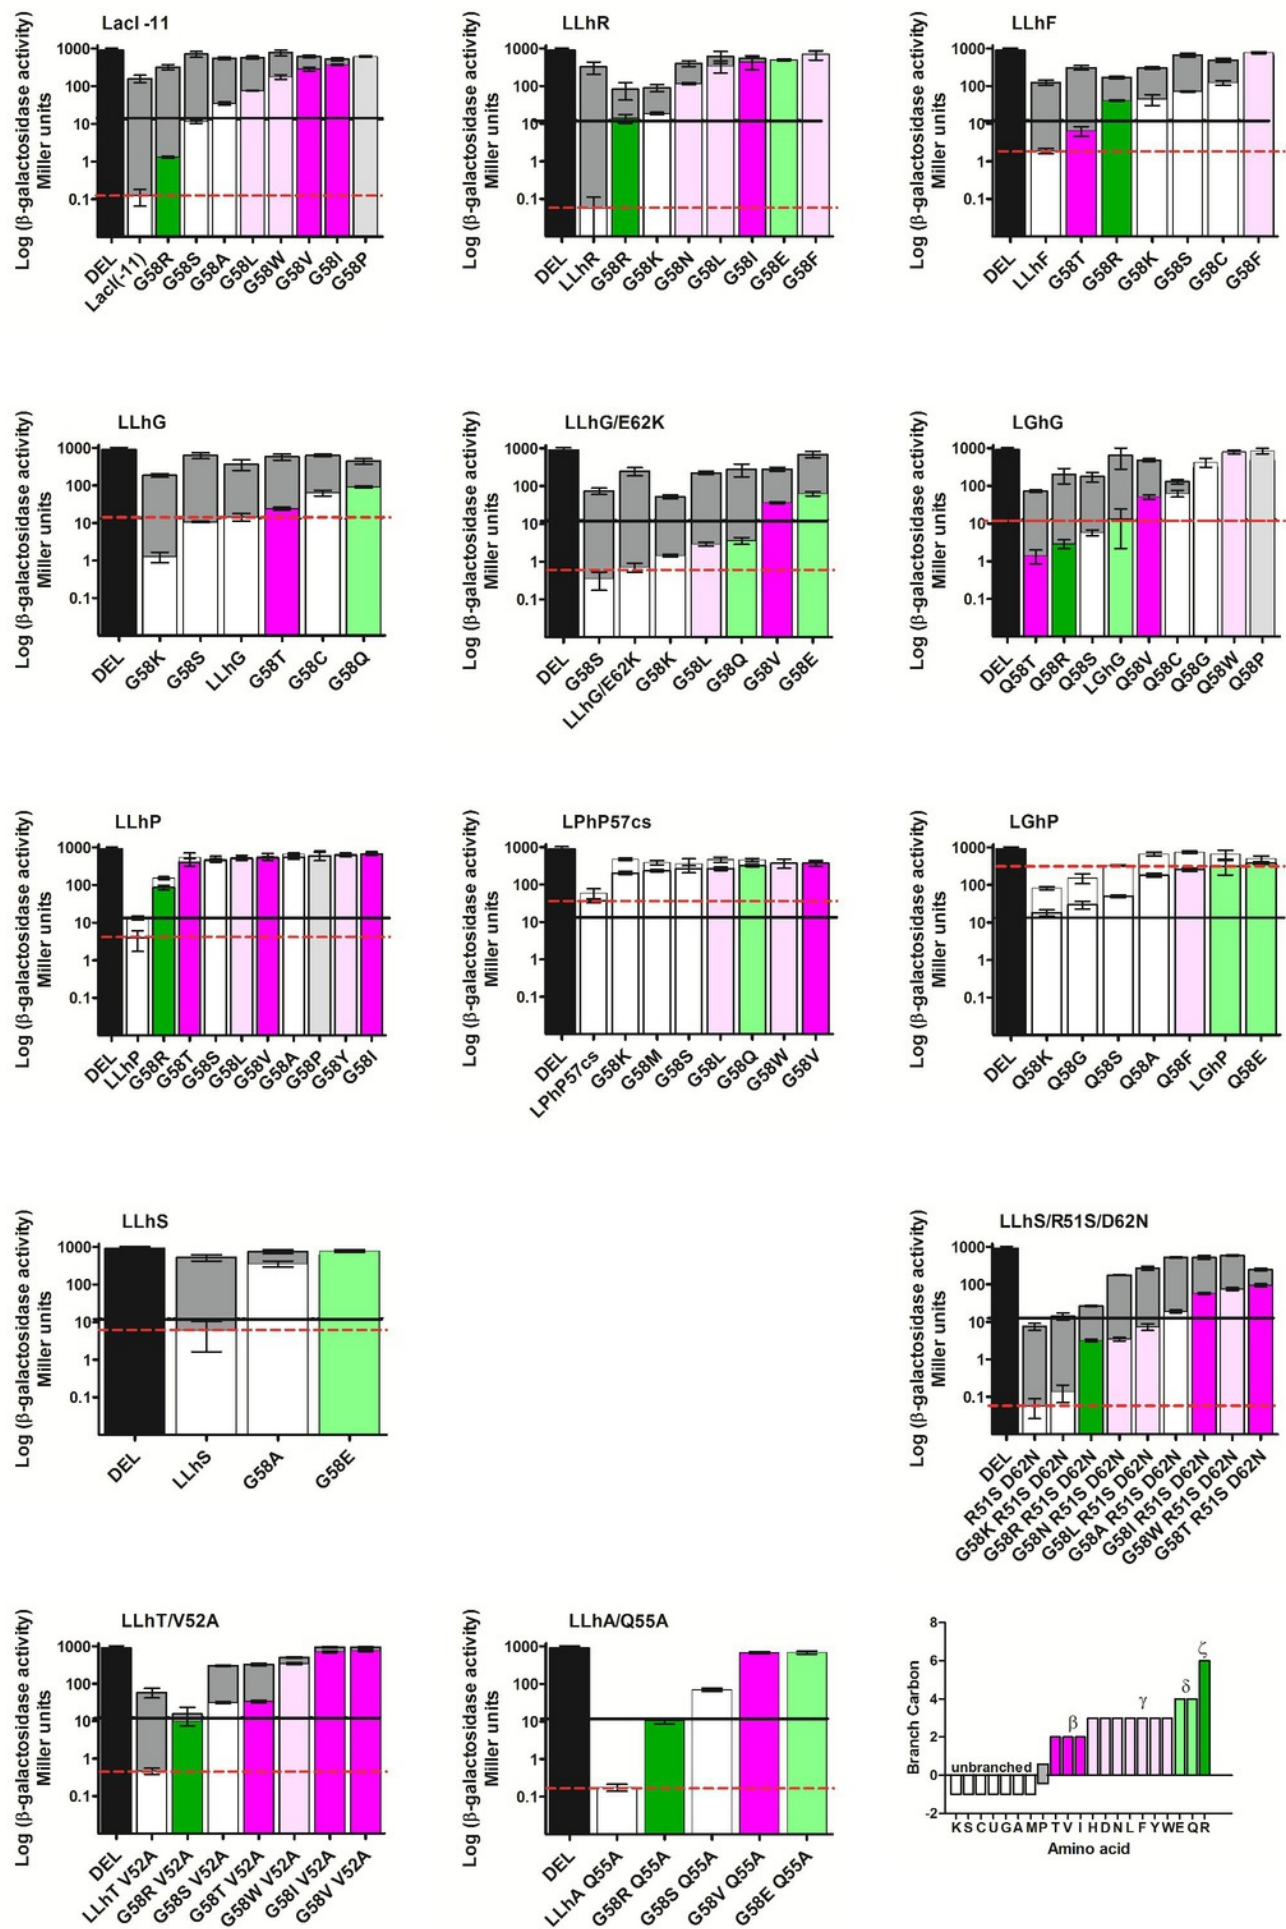

Figure S62: Physicochemical trends: Position 58, Side chain branching

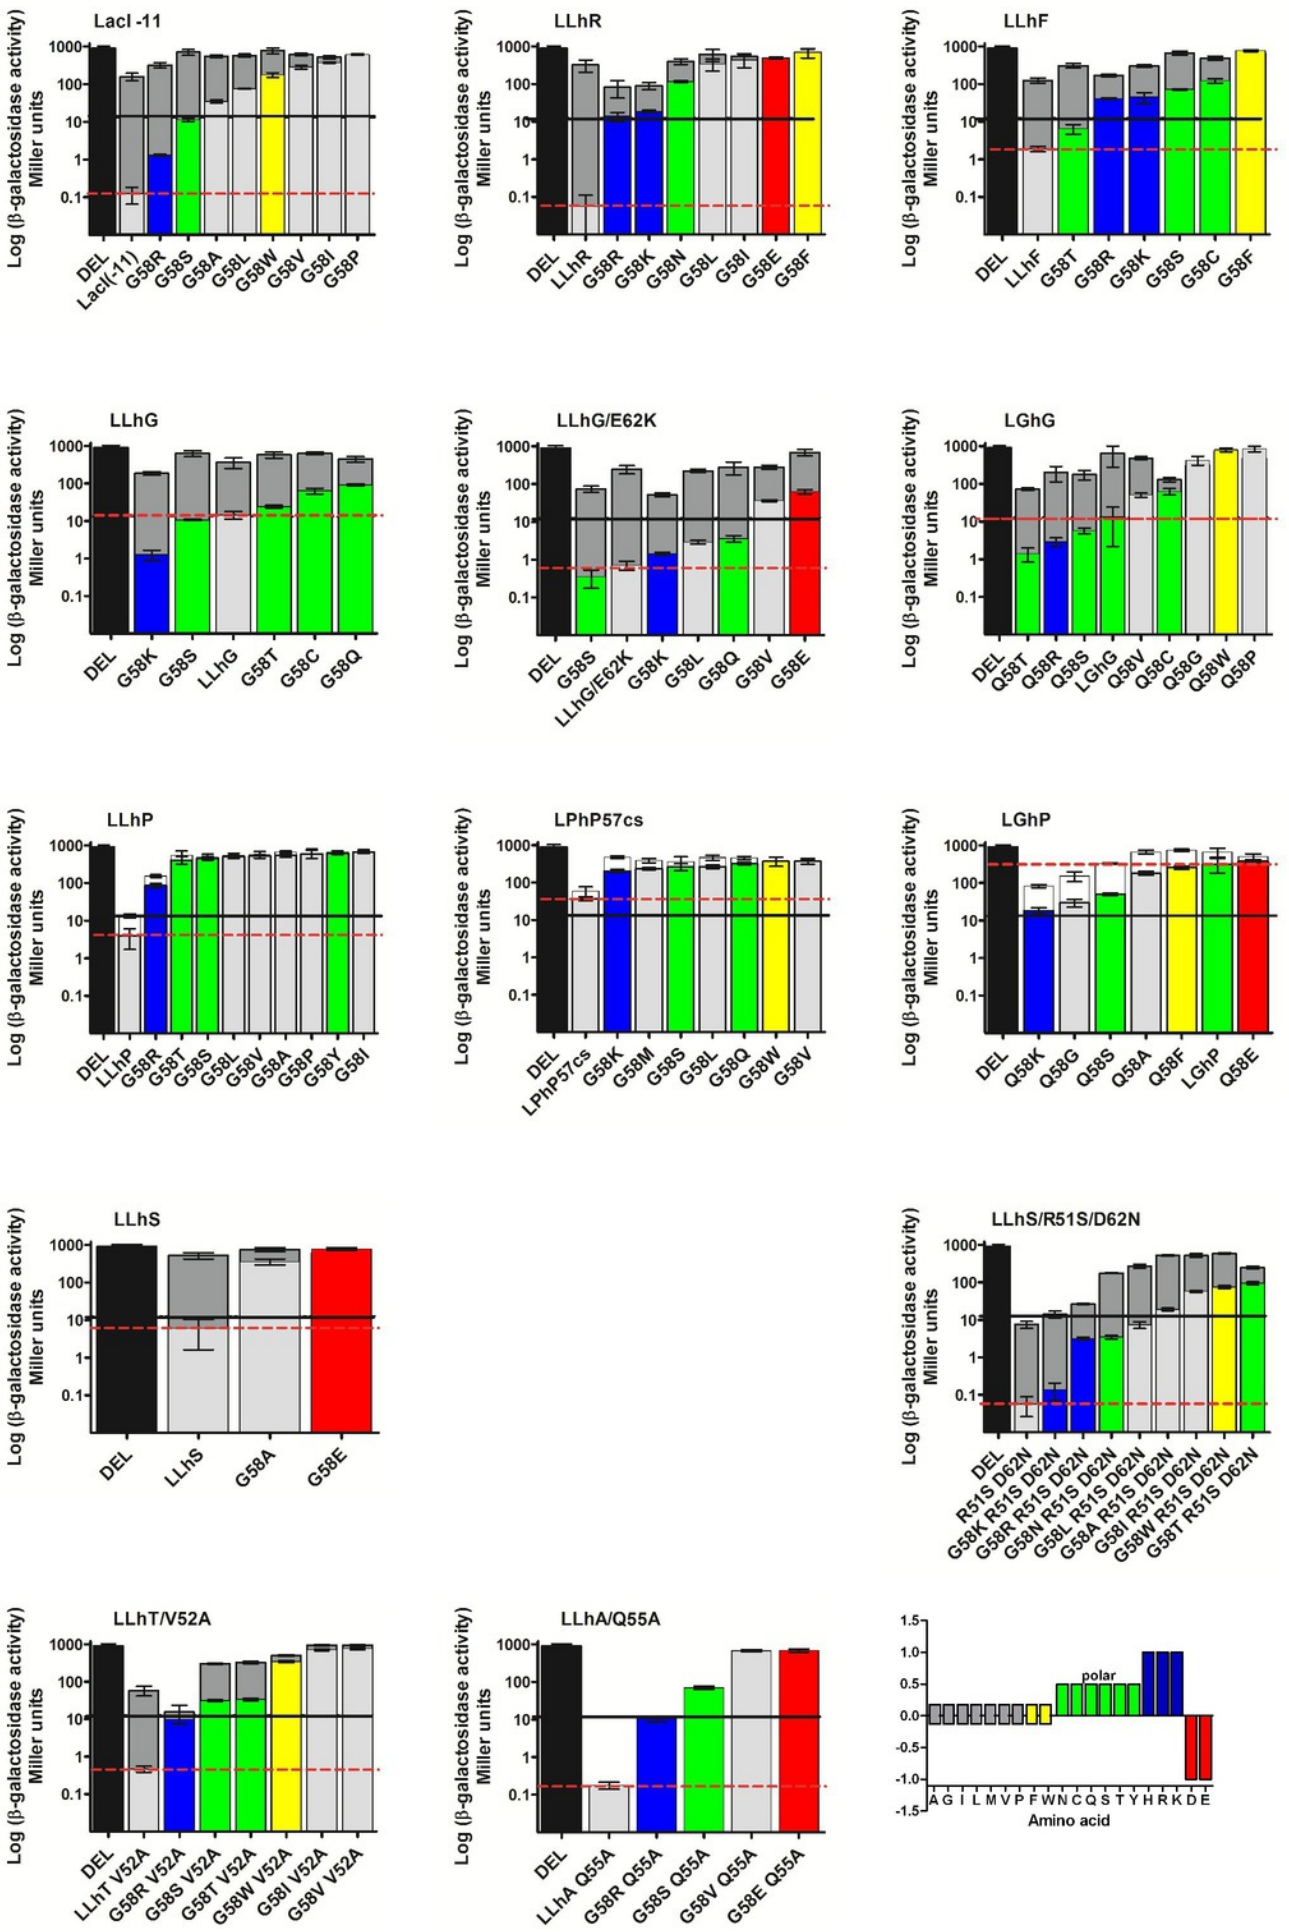

Figure S63: Physicochemical trends: Position 58, Charge/polarity/aromaticity

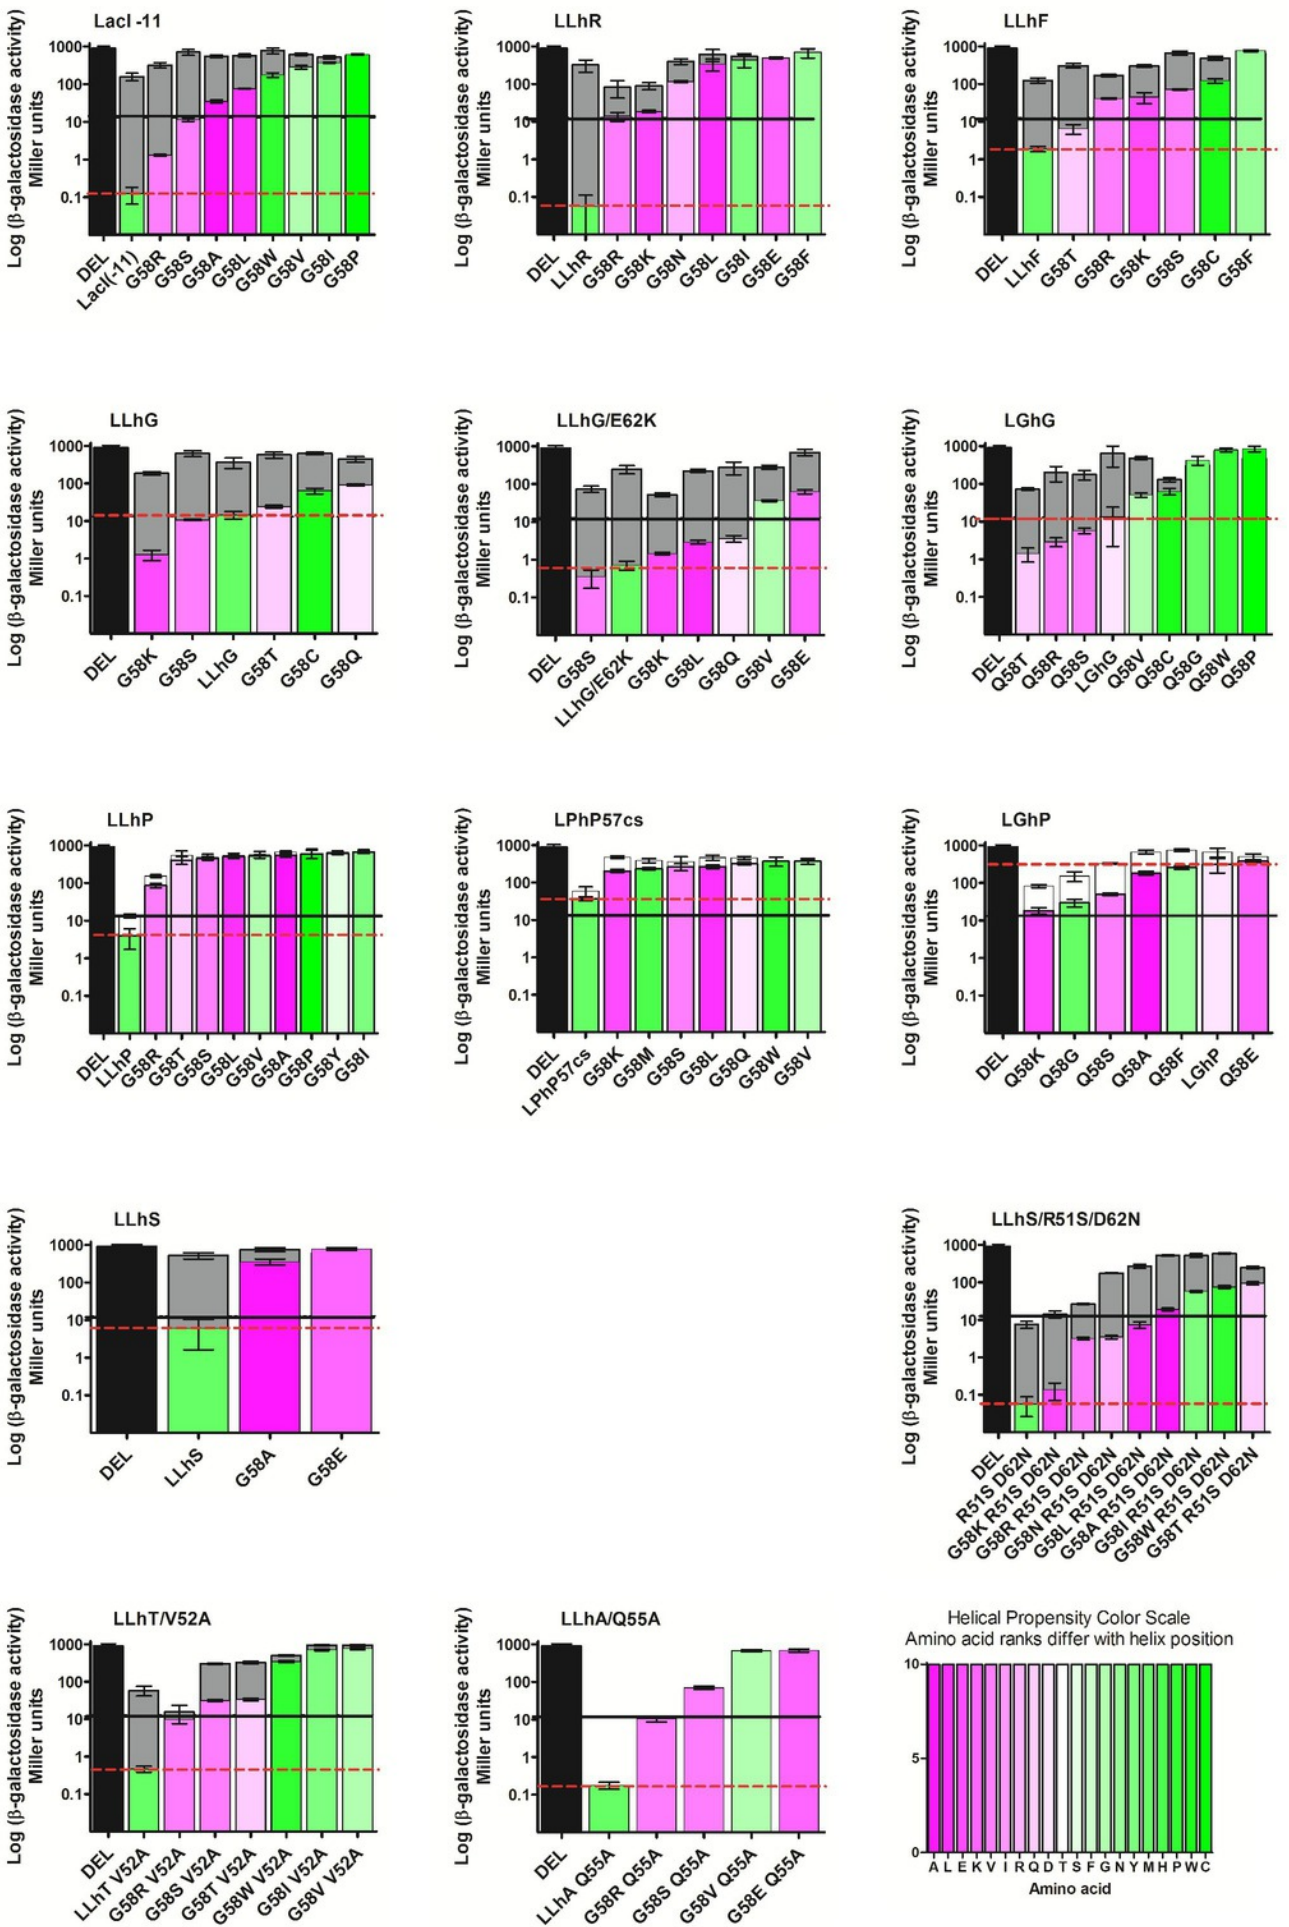

Figure S64: Physicochemical trends: Position 58, Helical propensity (C1 scale)

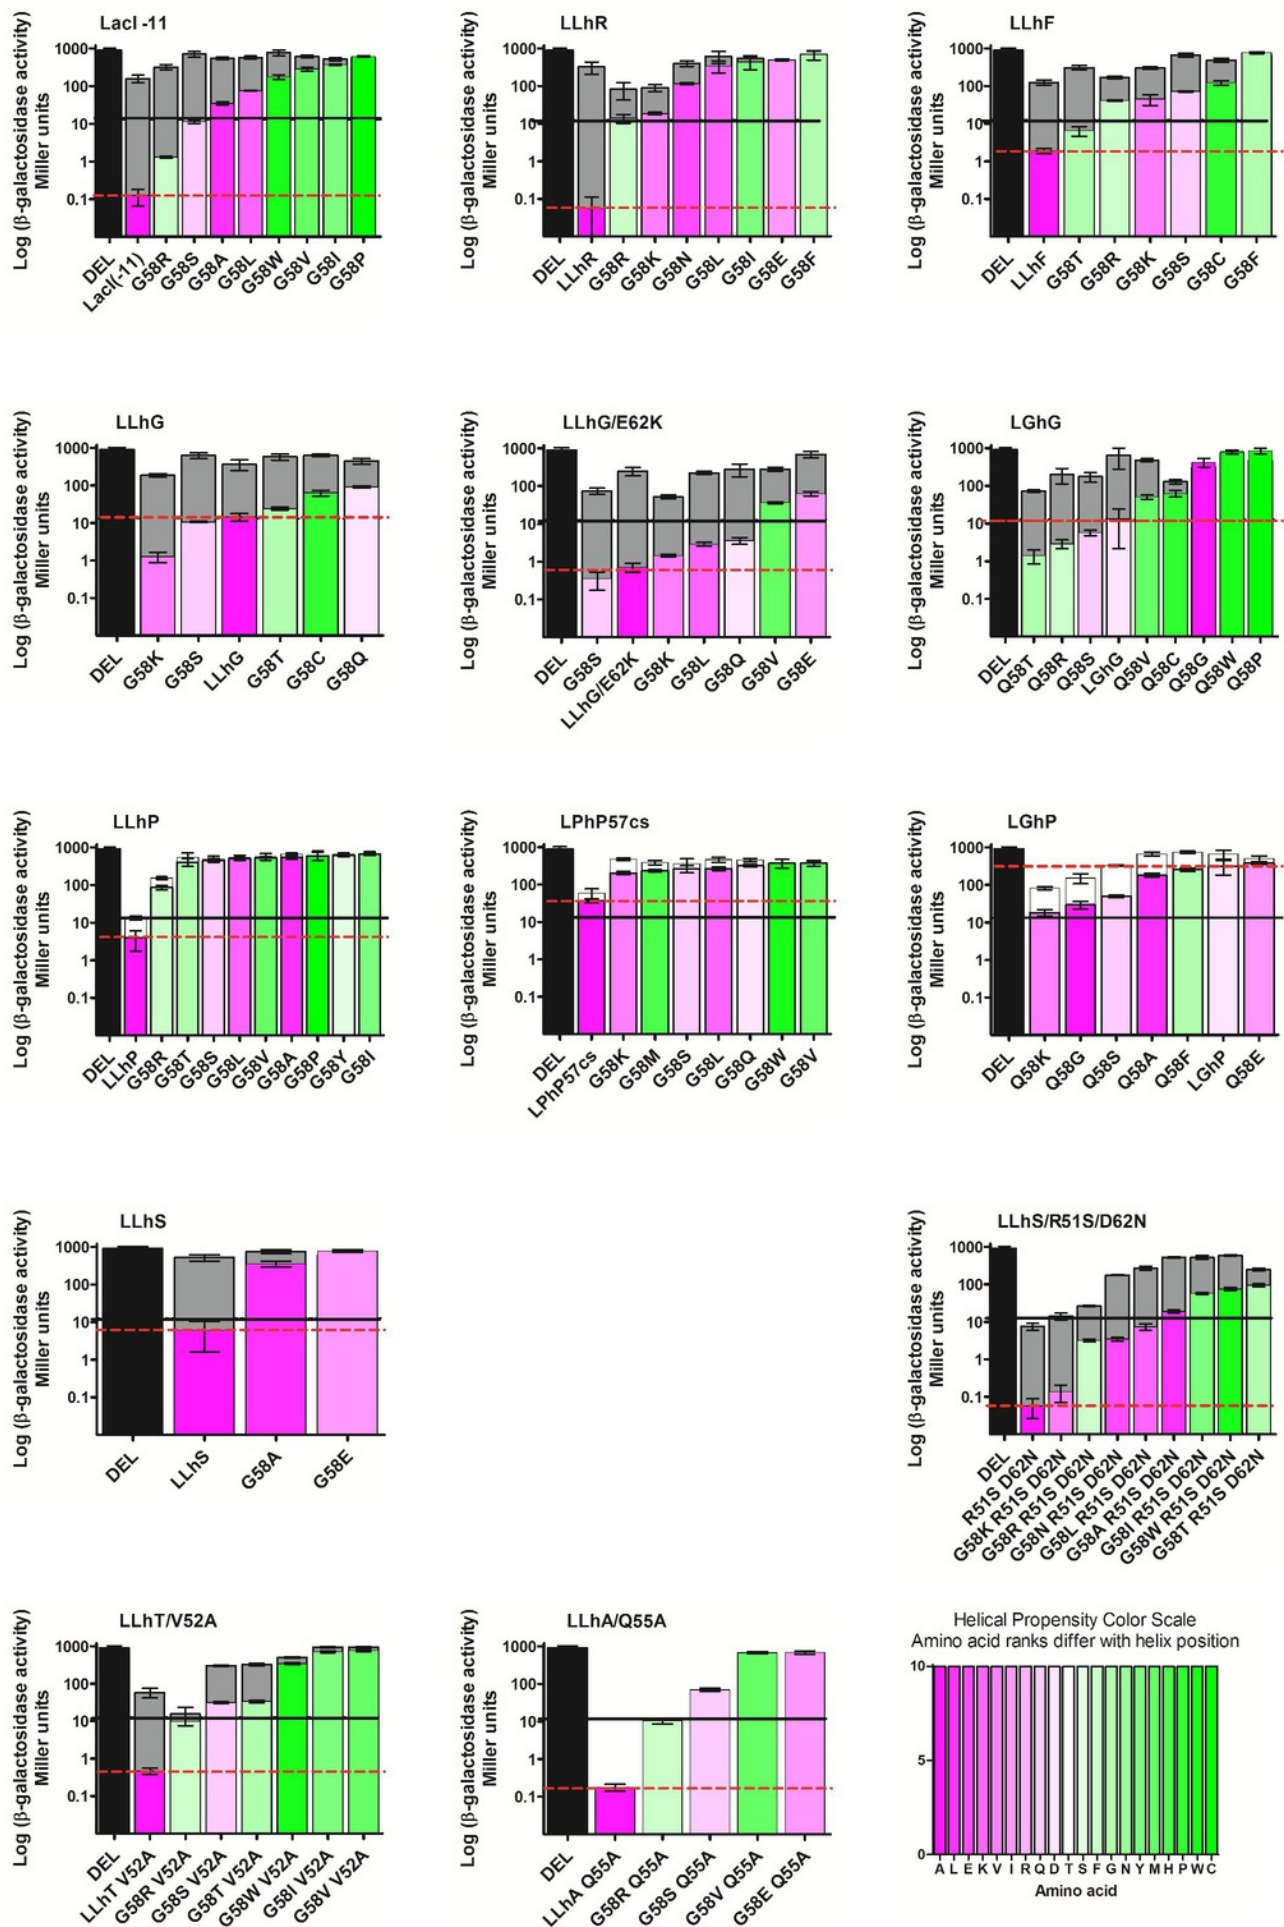

Figure S65: Physicochemical trends: Position 58, Helical propensity  $C_{cap}$  scale)

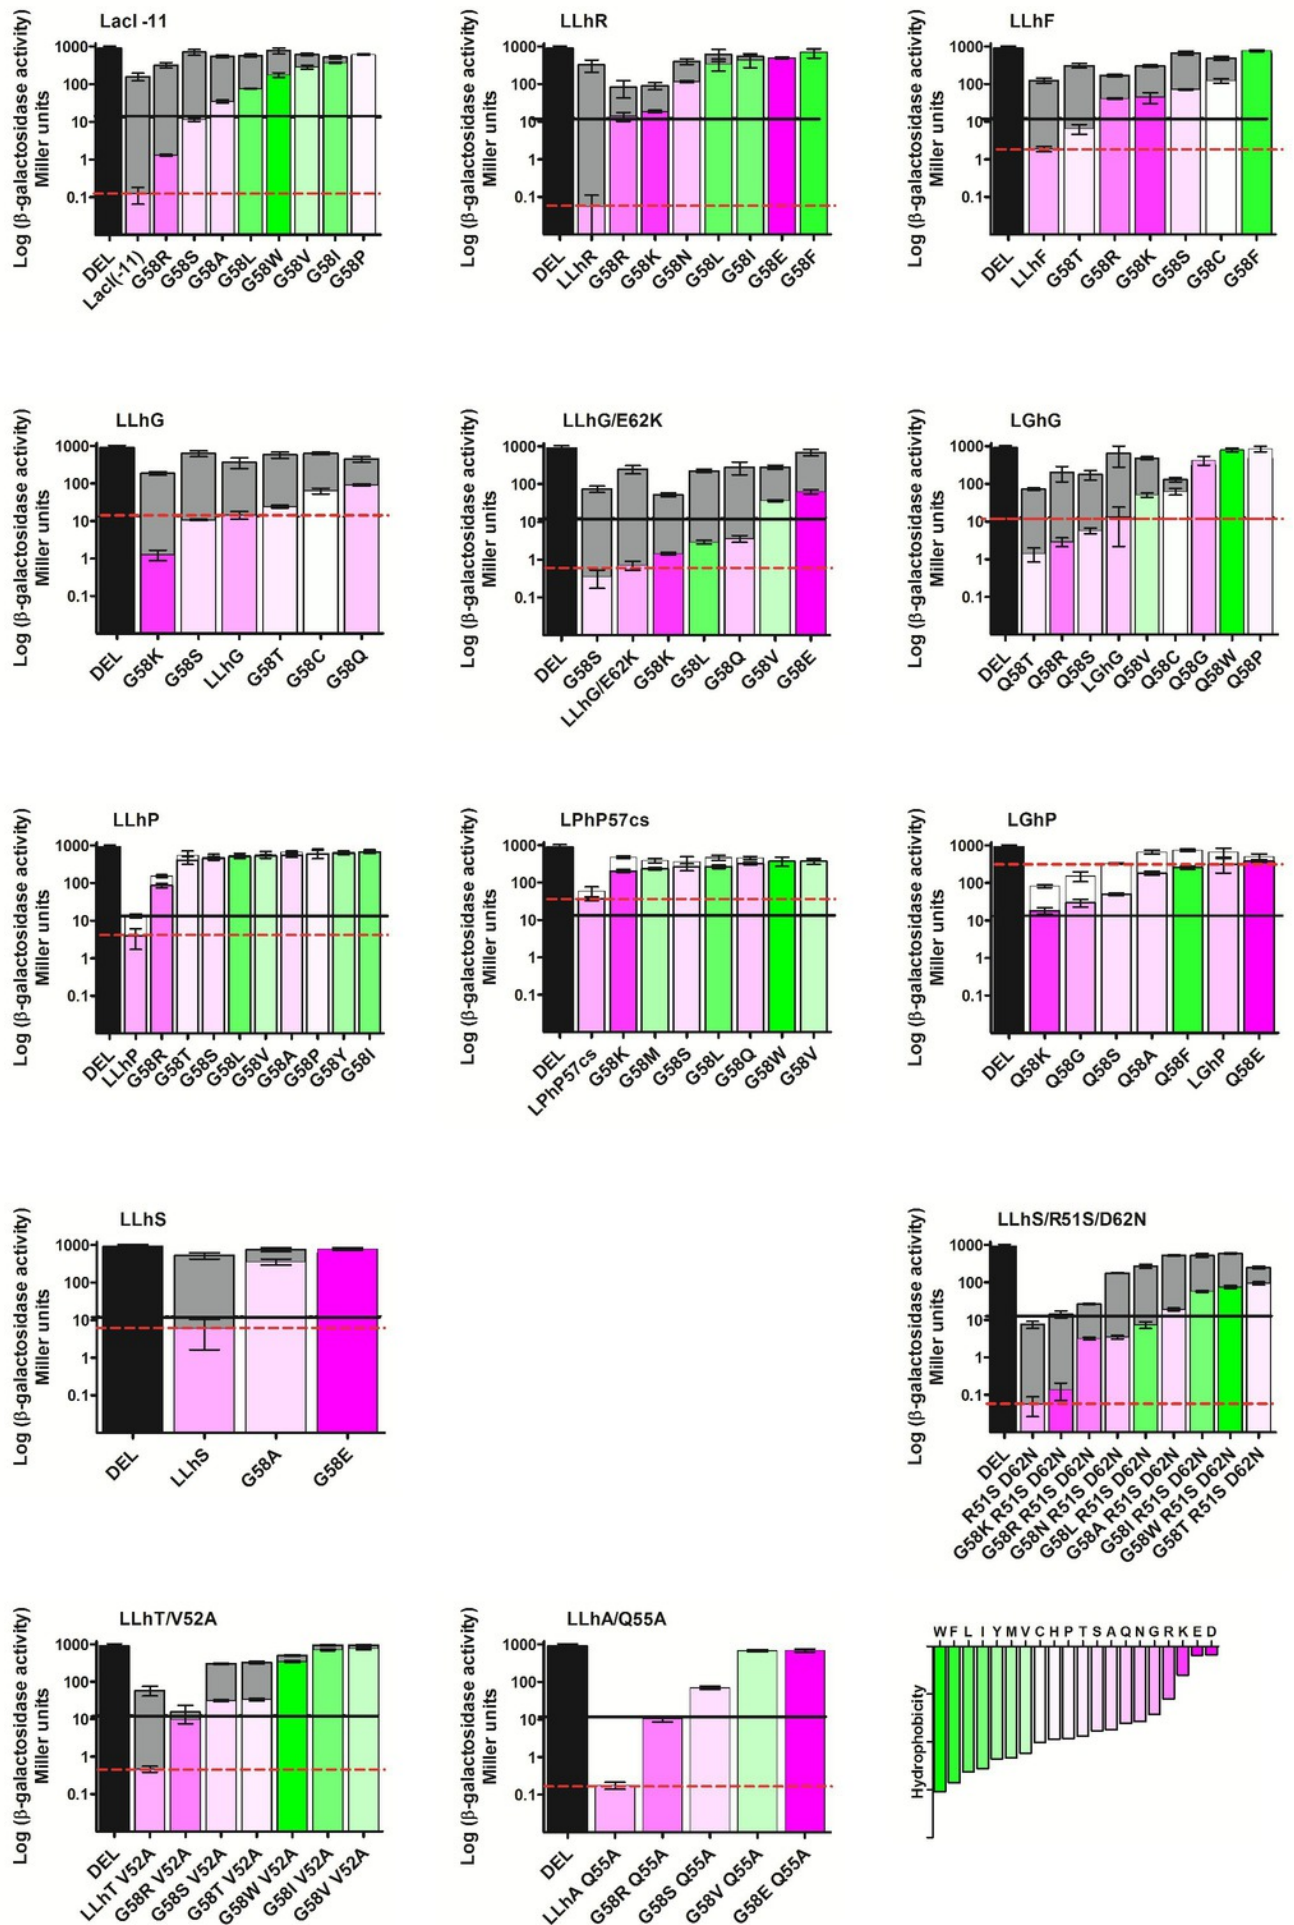

Figure S66: Physicochemical trends: Position 58, Hydrophobicity

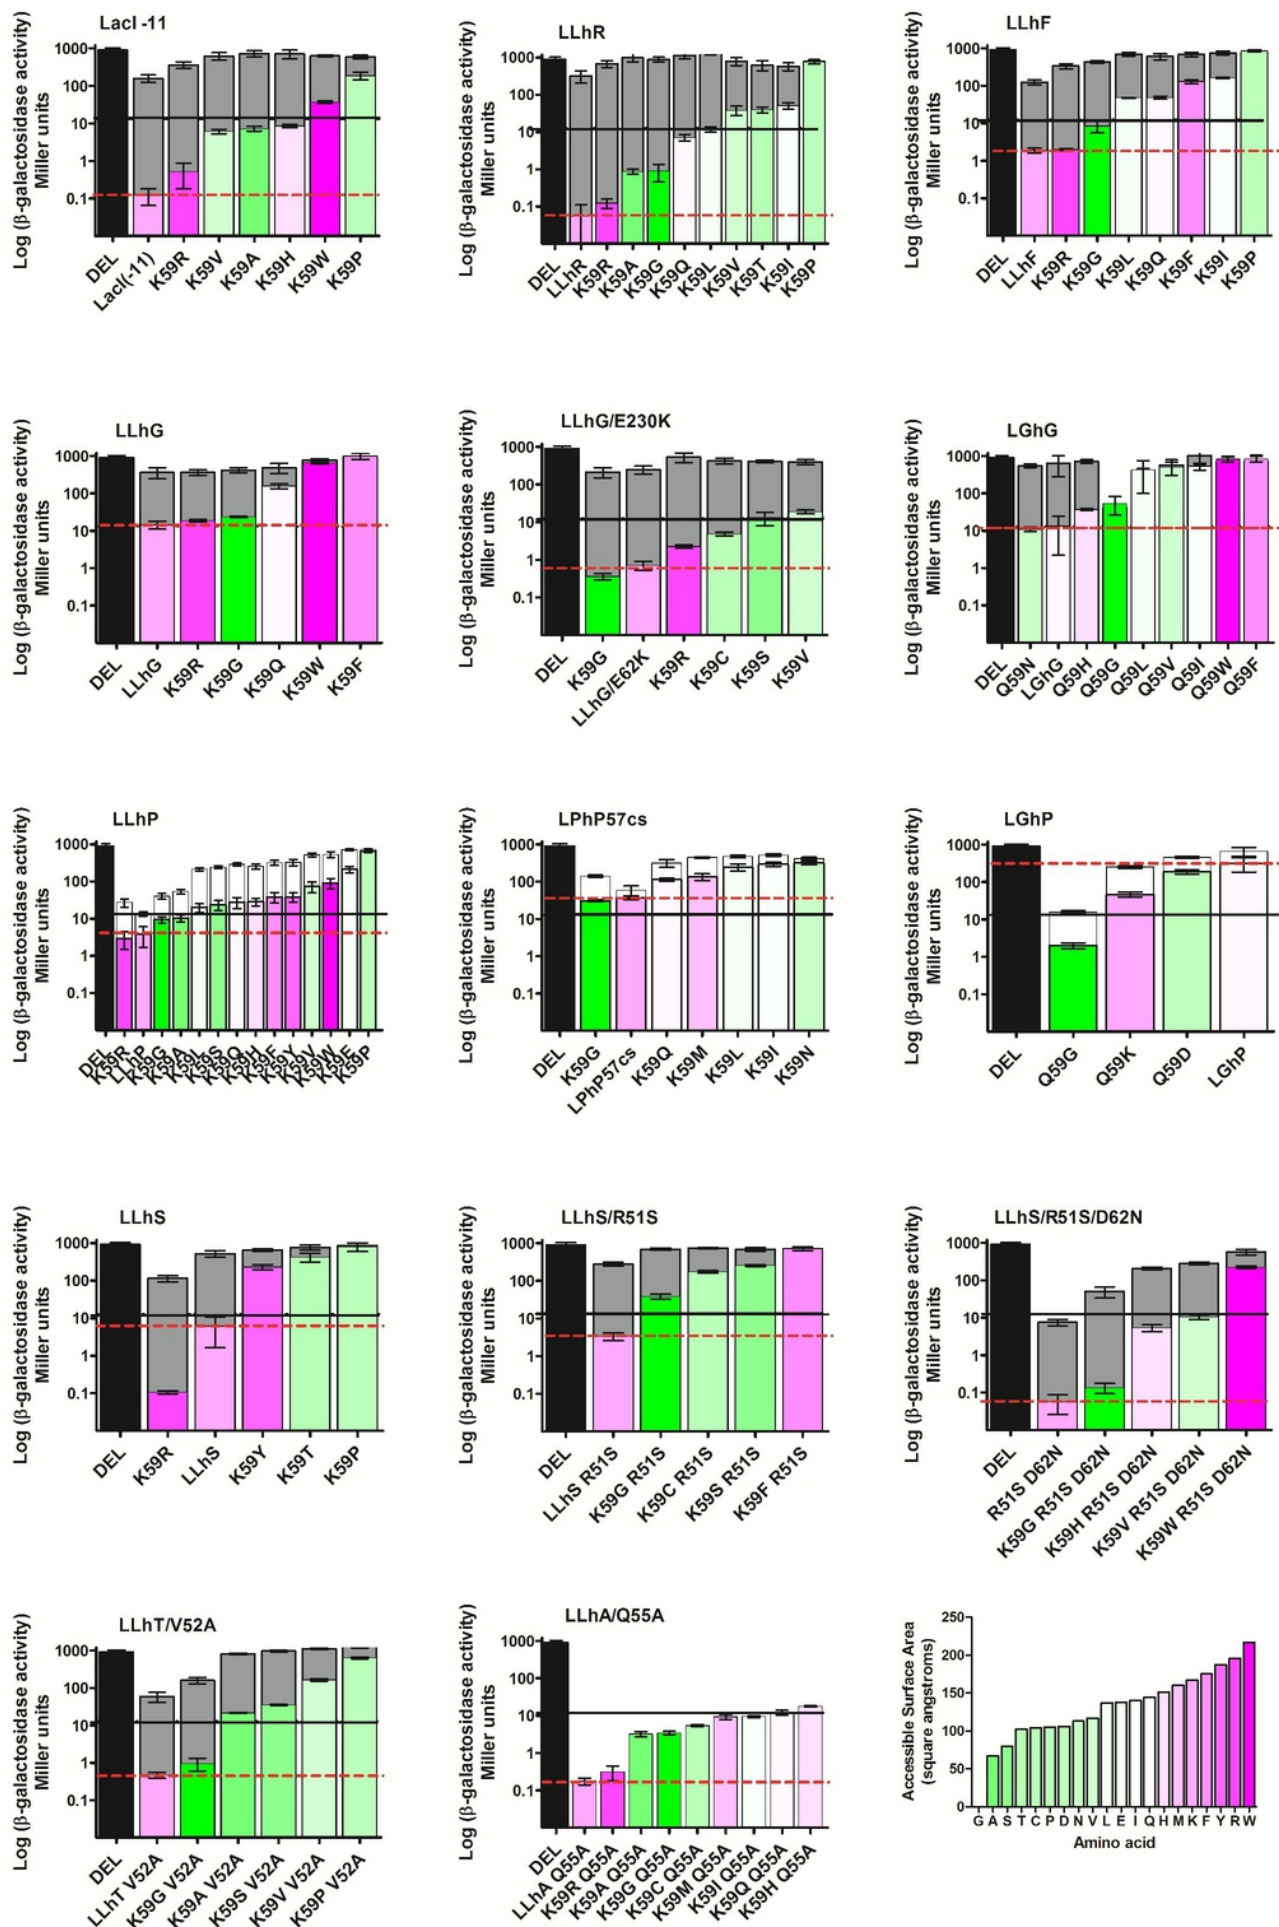

Figure S67: Physicochemical trends: Position 59, Accessible surface area

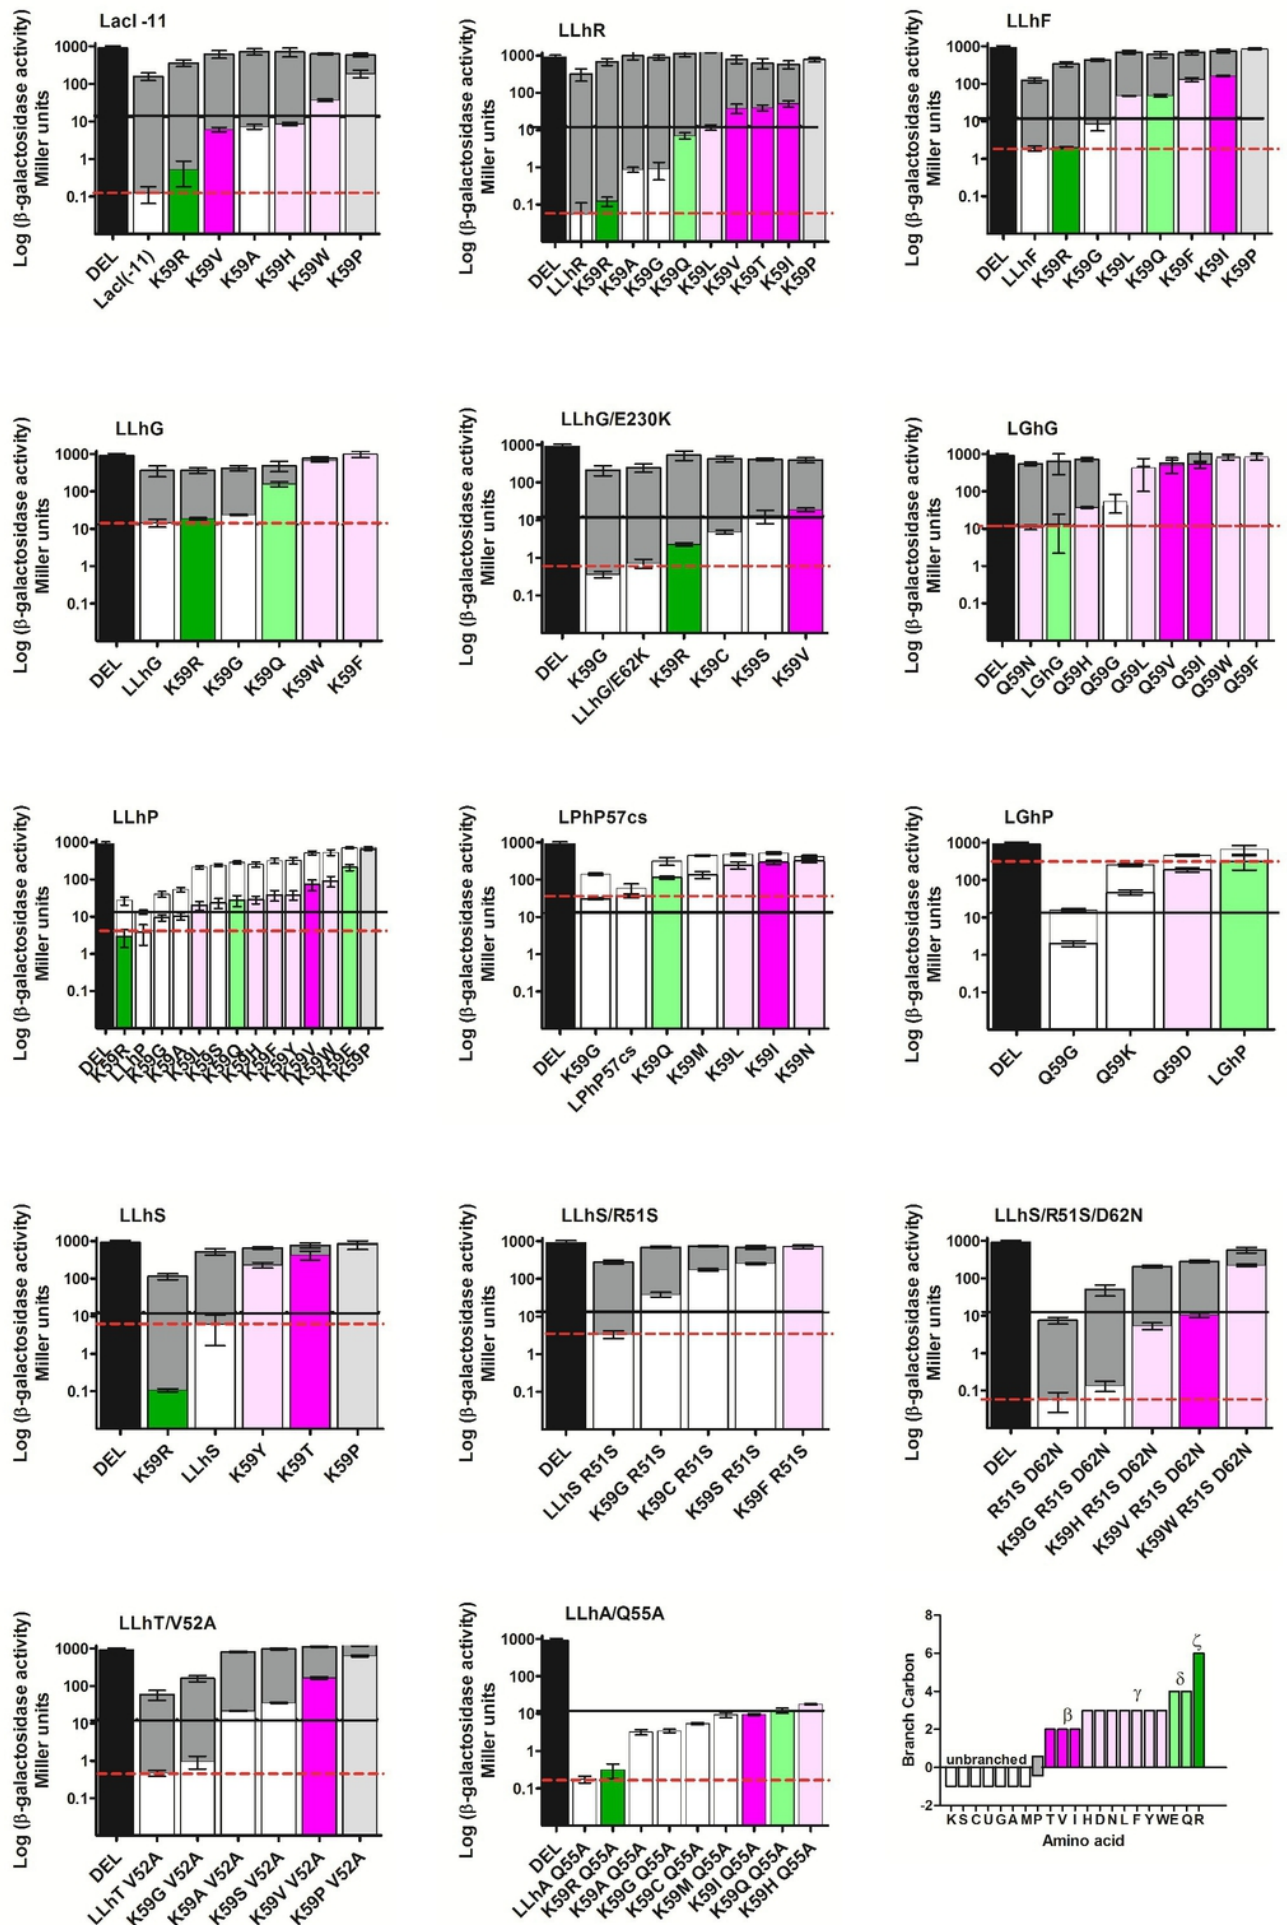

Figure S68: Physicochemical trends: Position 59, Side chain branching



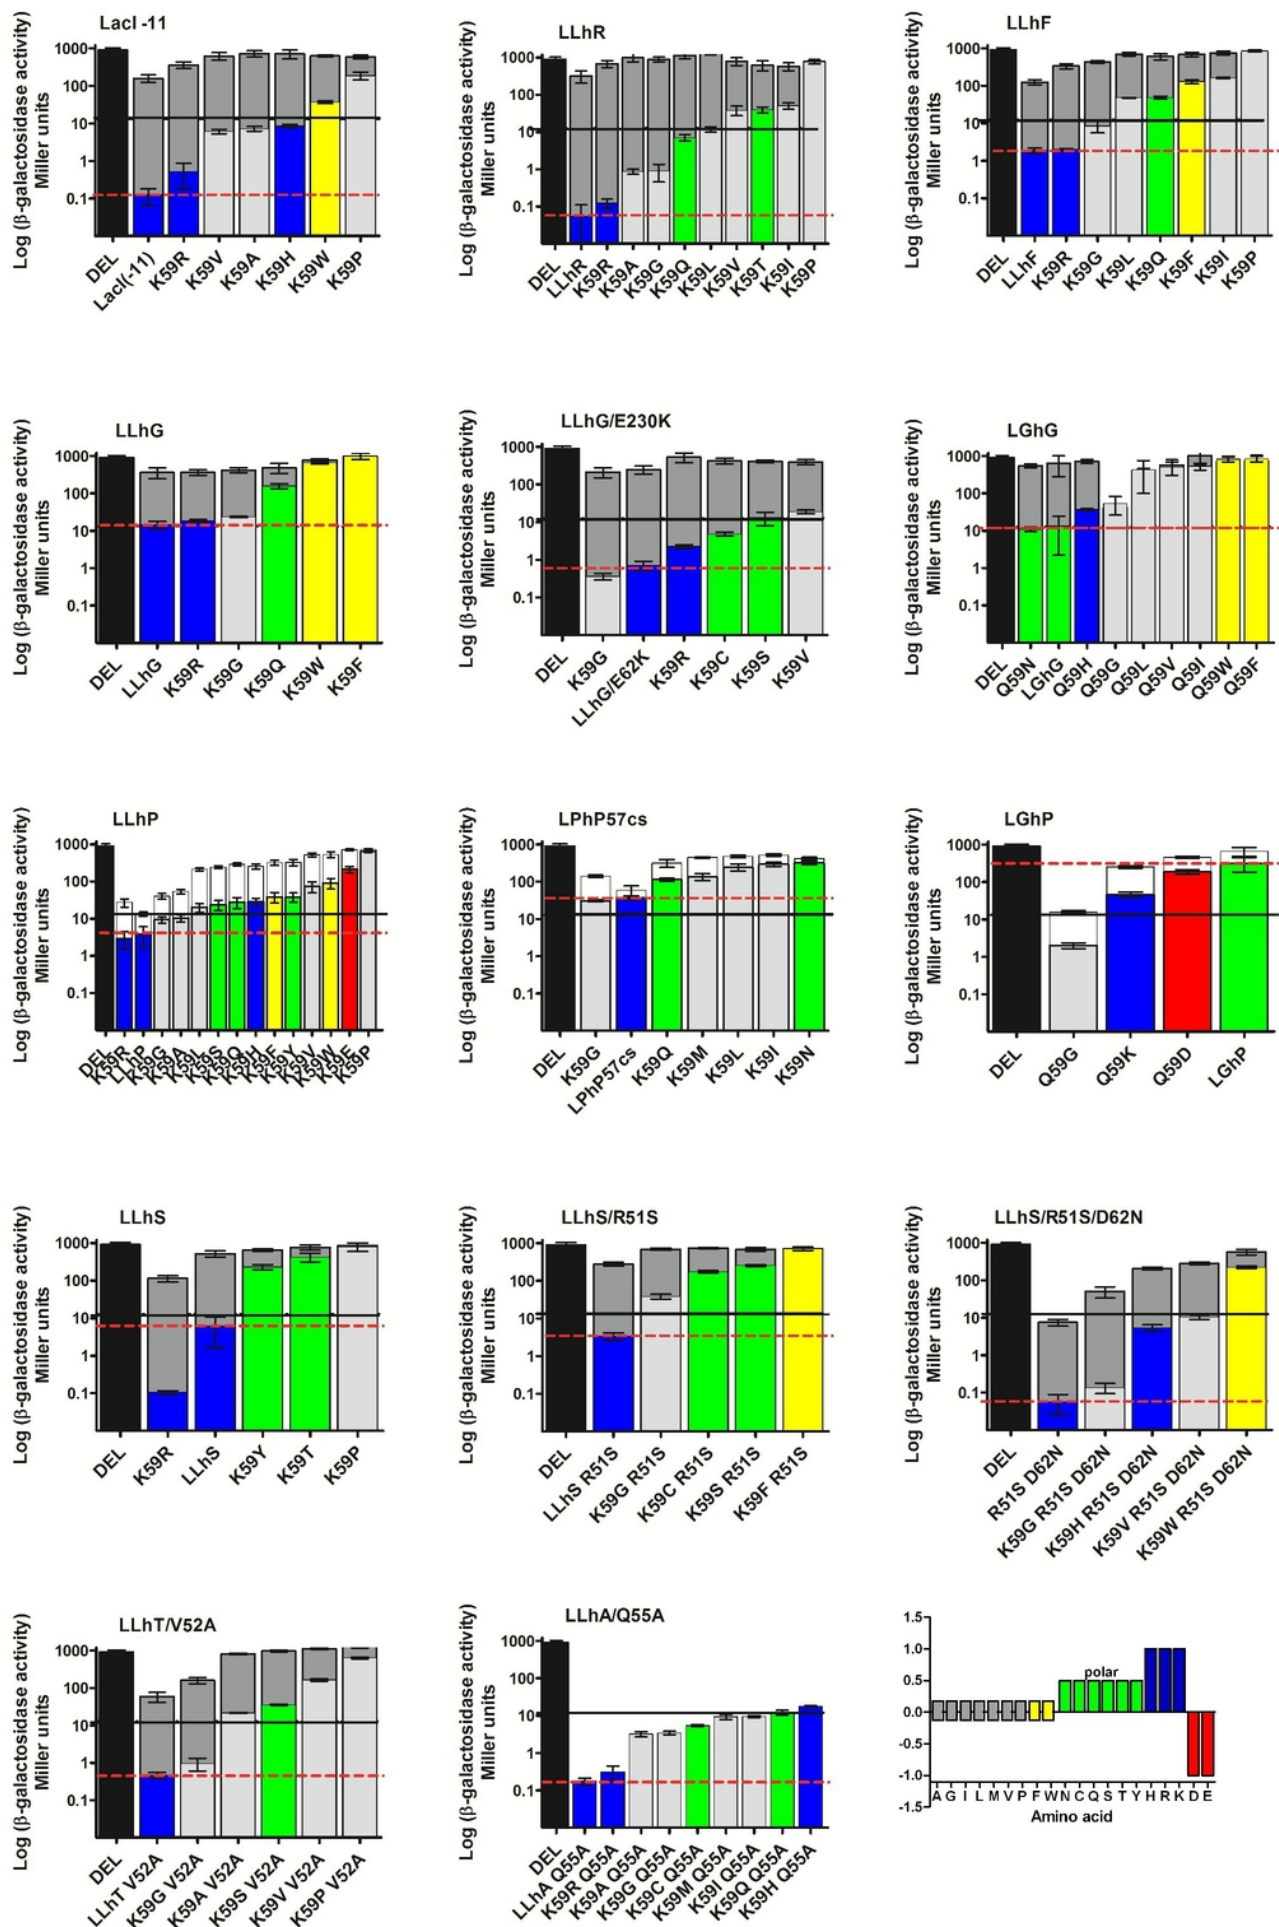

Figure S69: Physicochemical trends: Position 59, Charge/polarity/aromaticity

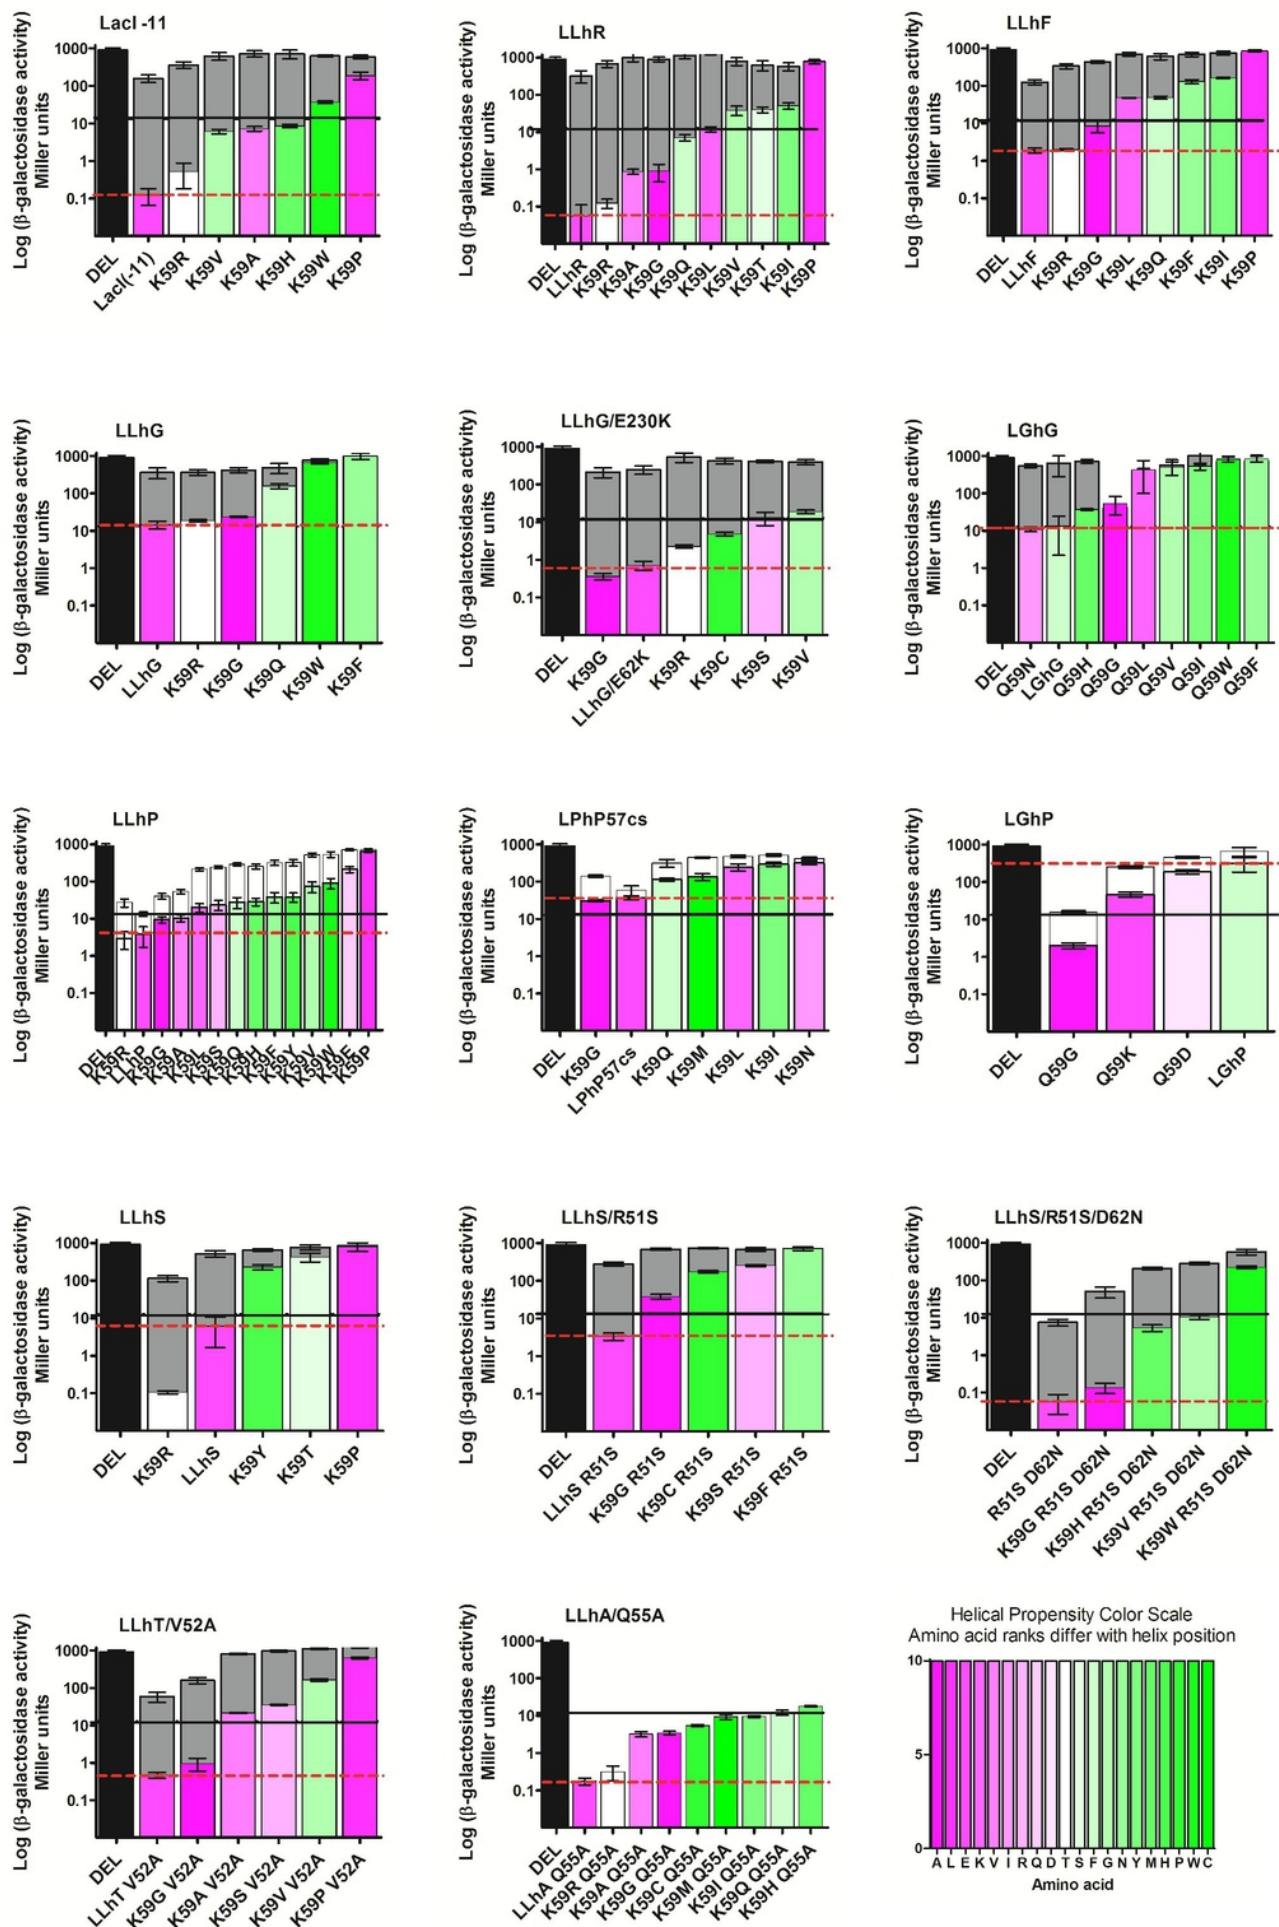

Figure S70: Physicochemical trends: Position 59, Helical propensity ( $C'$  scale)

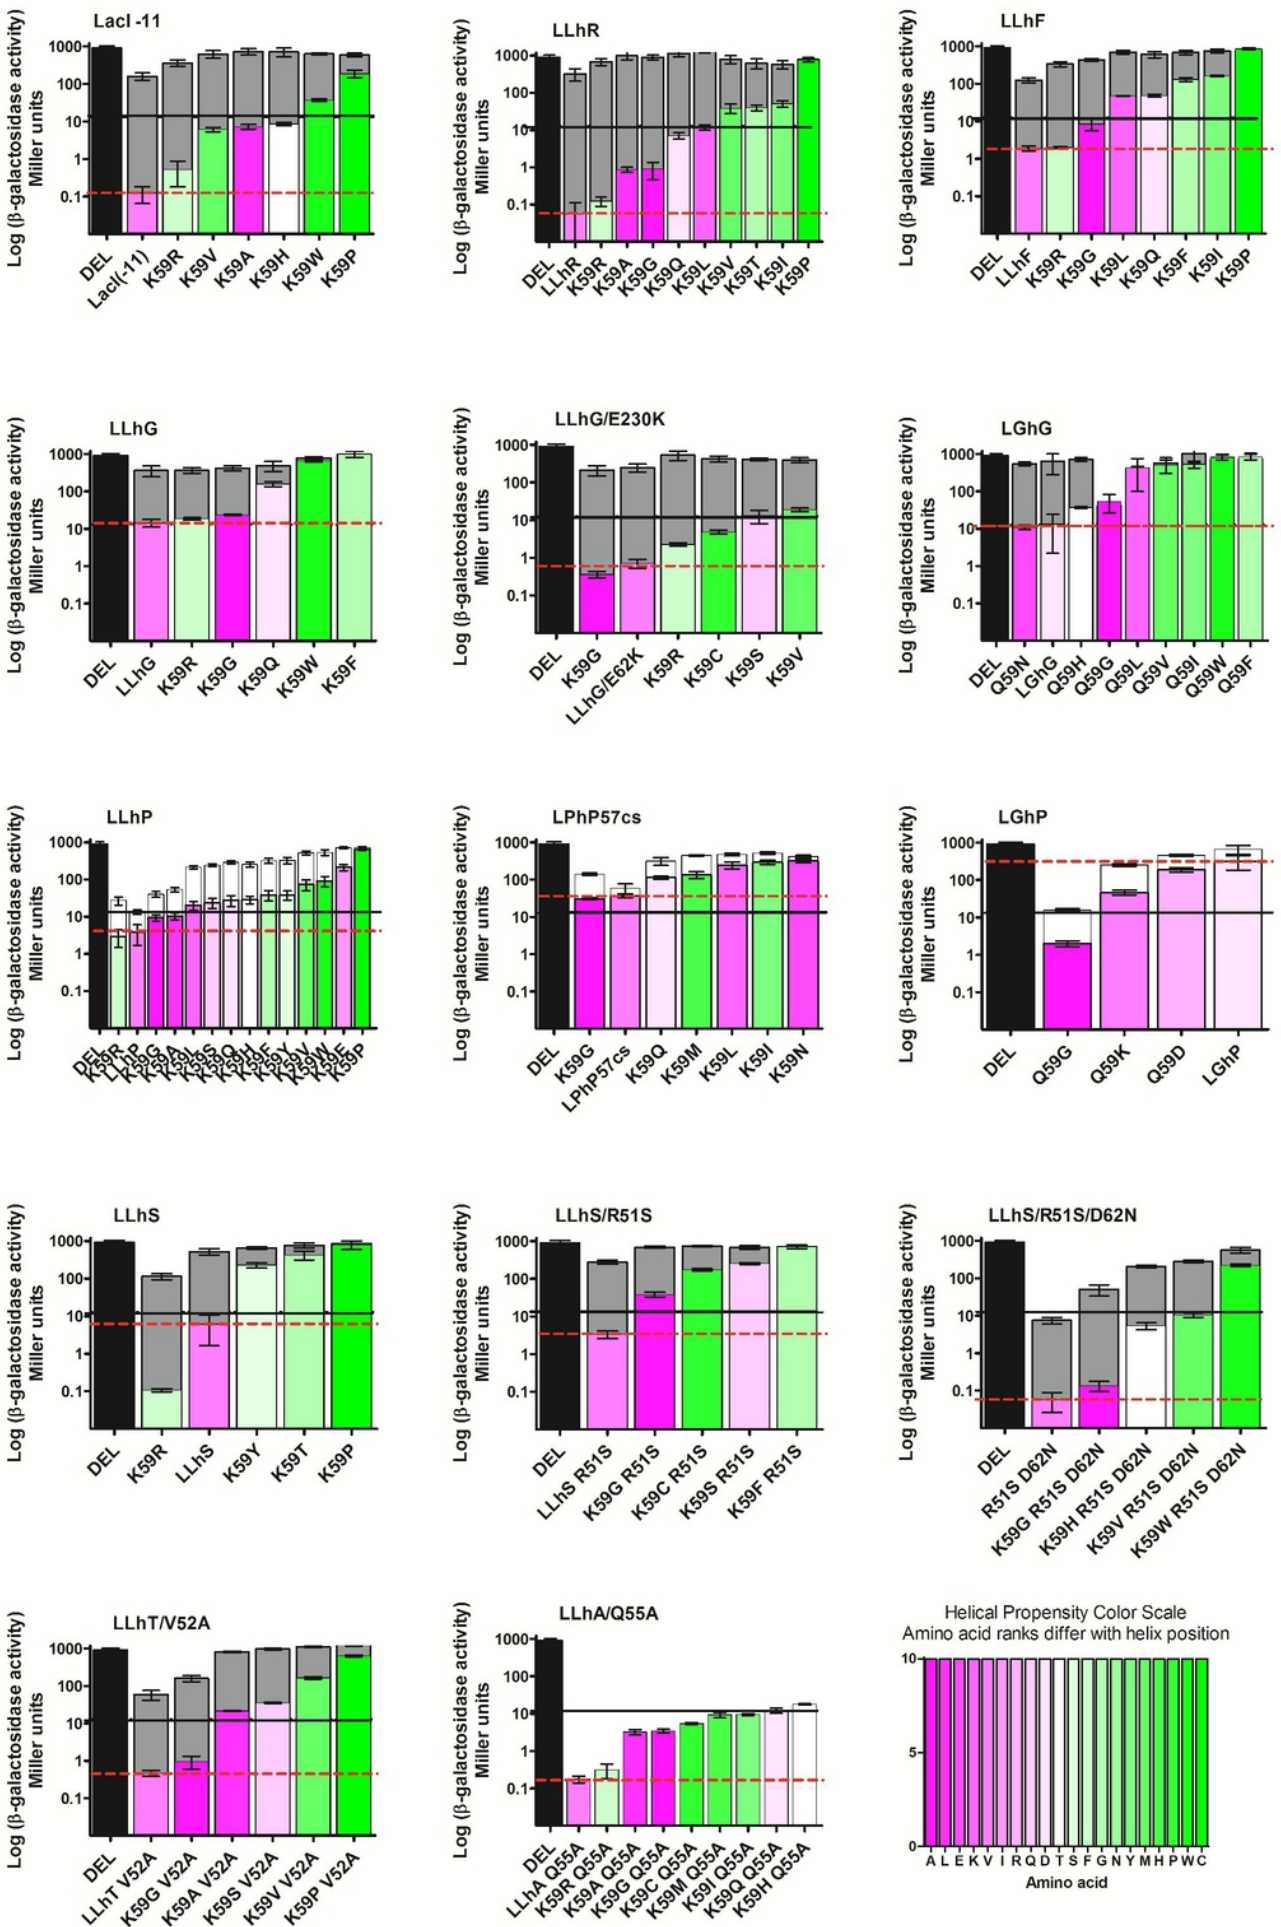

Figure S71: Physicochemical trends: Position 59, Helical propensity ( $C_{cap}$  scale)

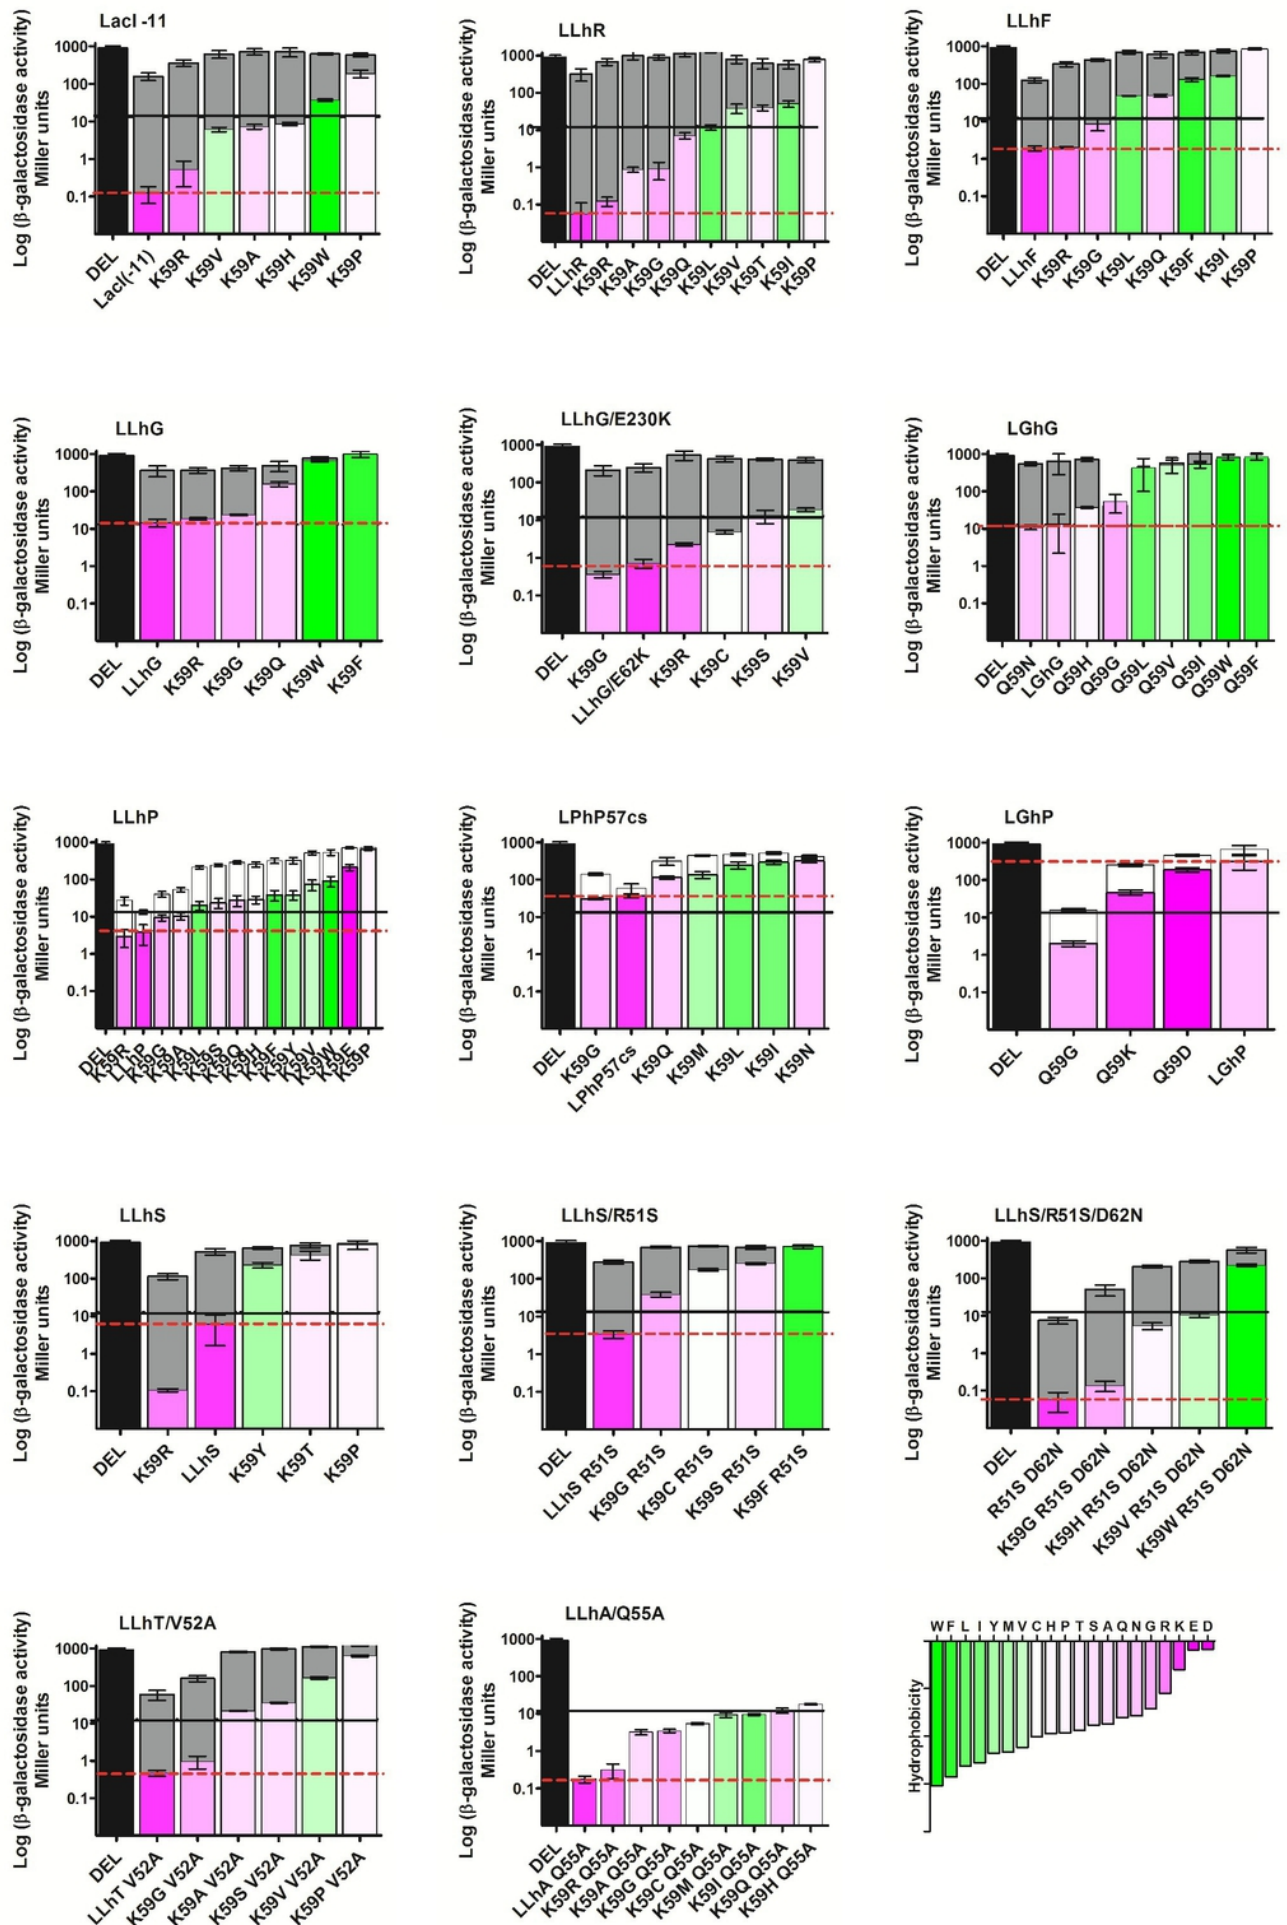

Figure S72: Physicochemical trends: Position 59, Hydrophobicity
