# Supplementary material for: Rheostats and Toggle Switches for Modulating Protein Function
Source: PubMed Central journal article supplement (PMC3875437; doi:10.1371/journal.pone.0083502), 2013-12-30
Supplement: pone.0083502.s007.pdf [file pone.0083502.s007.pdf]

Supplemental Material for:  
Rheostats and toggle switches for modulating protein function  
File 7: Physicochemical trends: Positions 60-62

Meinhardt, Manley, Parente and Swint-Kruse

**List of Figures**

|     |                                                                               |    |
|-----|-------------------------------------------------------------------------------|----|
| S73 | Physicochemical trends: Position 60, Accessible surface area . . . . .        | 3  |
| S74 | Physicochemical trends: Position 60, Side chain branching . . . . .           | 4  |
| S75 | Physicochemical trends: Position 60, Charge/polarity/aromaticity . . . . .    | 5  |
| S76 | Physicochemical trends: Position 60, Helical propensity (C' scale) . . . . .  | 6  |
| S77 | Physicochemical trends: Position 60, Helical propensity (C'' scale) . . . . . | 7  |
| S78 | Physicochemical trends: Position 60, Hydrophobicity . . . . .                 | 8  |
| S79 | Physicochemical trends: Position 61, Accessible surface area . . . . .        | 9  |
| S80 | Physicochemical trends: Position 61, Side chain branching . . . . .           | 10 |
| S81 | Physicochemical trends: Position 61, Charge/polarity/aromaticity . . . . .    | 11 |
| S82 | Physicochemical trends: Position 61, Helical propensity (C'' scale) . . . . . | 12 |
| S83 | Physicochemical trends: Position 61, Hydrophobicity . . . . .                 | 13 |
| S84 | Physicochemical trends: Position 62, Accessible surface area . . . . .        | 14 |
| S85 | Physicochemical trends: Position 62, Side chain branching . . . . .           | 15 |
| S86 | Physicochemical trends: Position 62, Charge/polarity/aromaticity . . . . .    | 16 |
| S87 | Physicochemical trends: Position 62, Hydrophobicity . . . . .                 | 17 |

**Figures S73-S87.** Physico-chemical trends: positions 60-62. Repression assay data for each position were color-coded according to various physico-chemical scales. For example, Figures S73-S75 show results for position 60 color-coded by accessible surface area of the free side chain [46], side chain branching, and charge/polarity/aromaticity. The relevant parameter can be determined from the legend in the lower right hand corner of each graph. (Note that the legend is placed in a middle location for position 62, in order to place results for LLhT and LLhT/V52A in close proximity.)

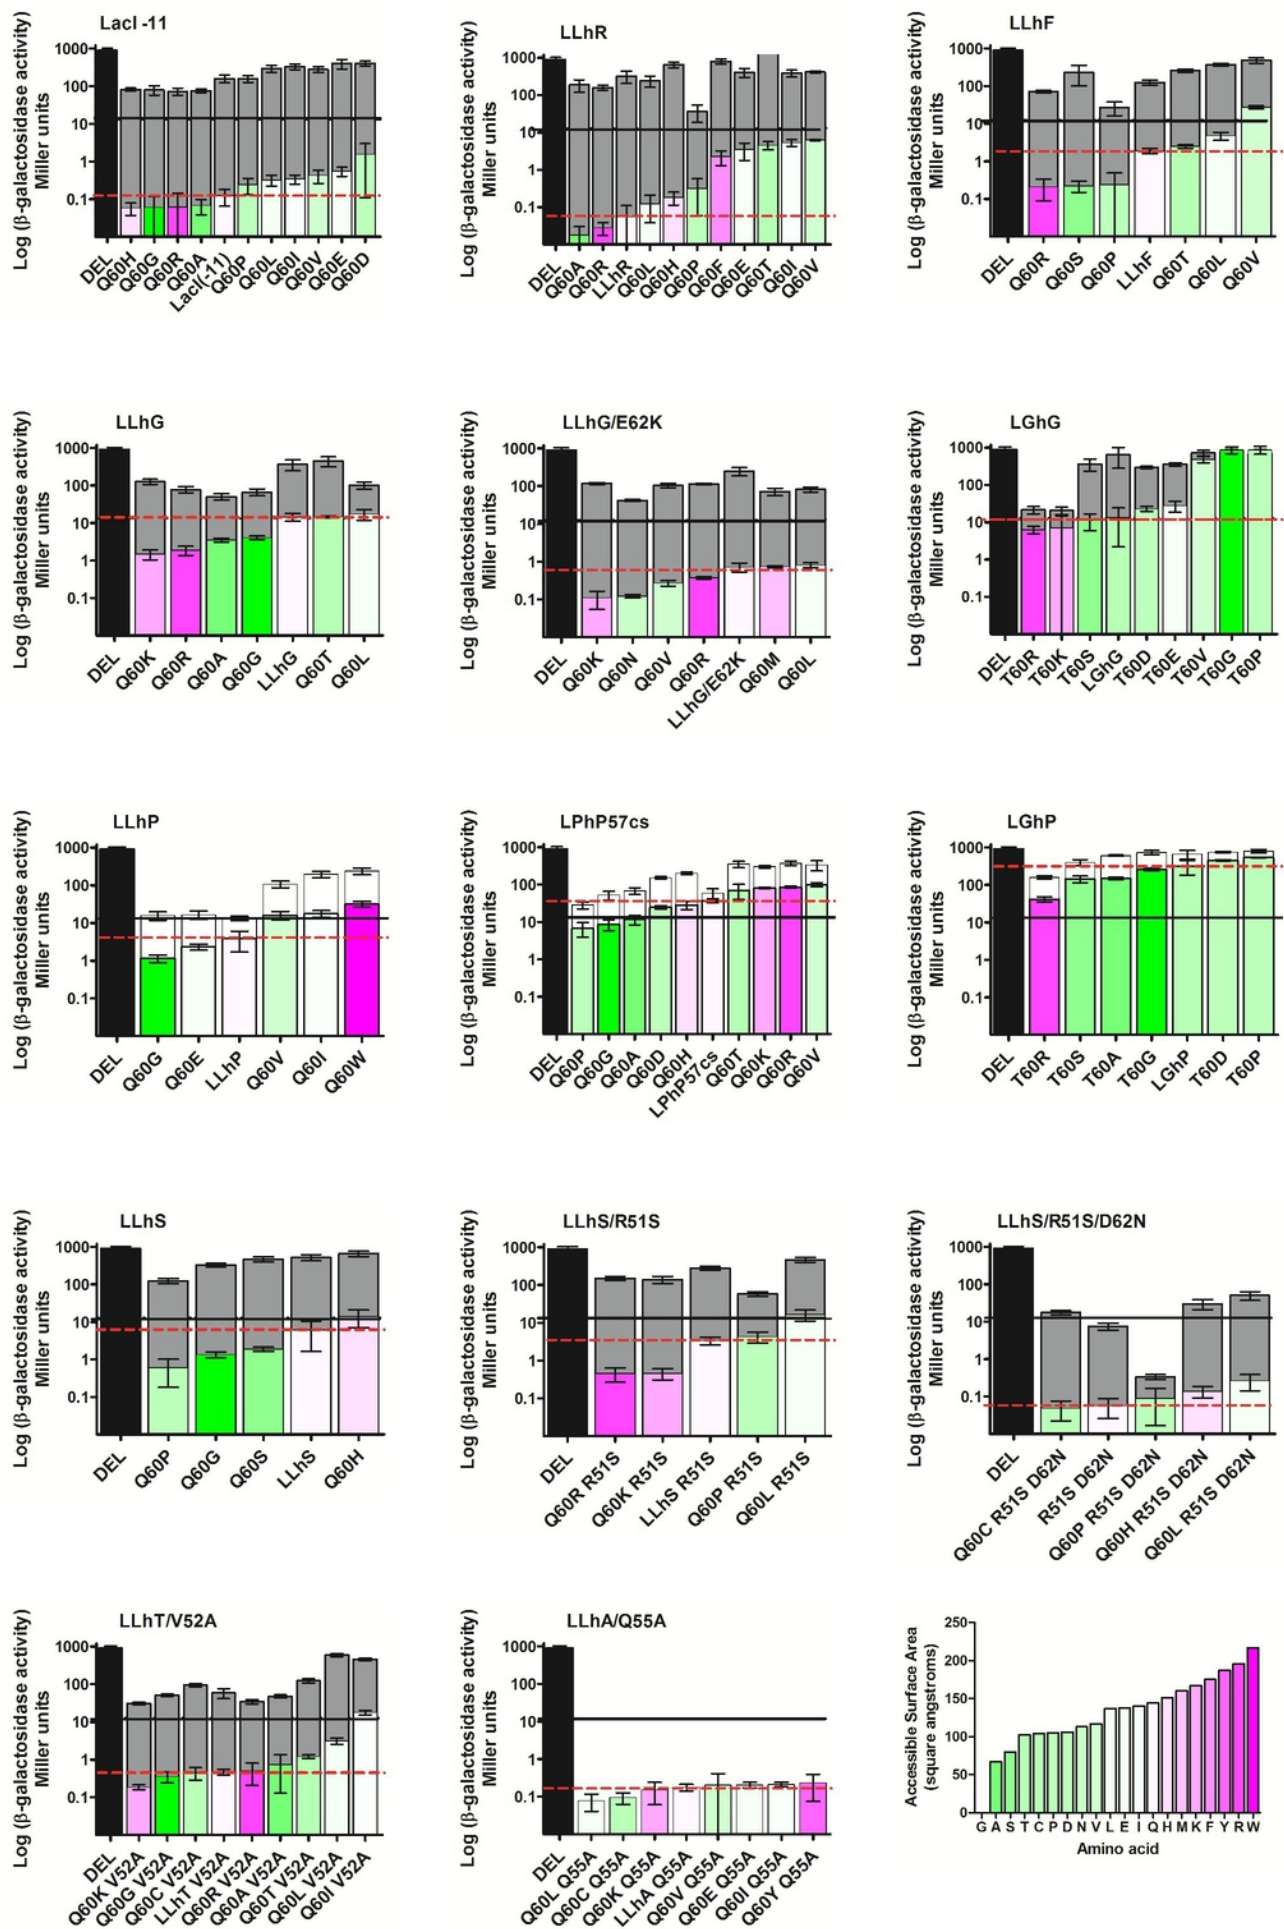

Figure S73: Physicochemical trends: Position 60, Accessible surface area

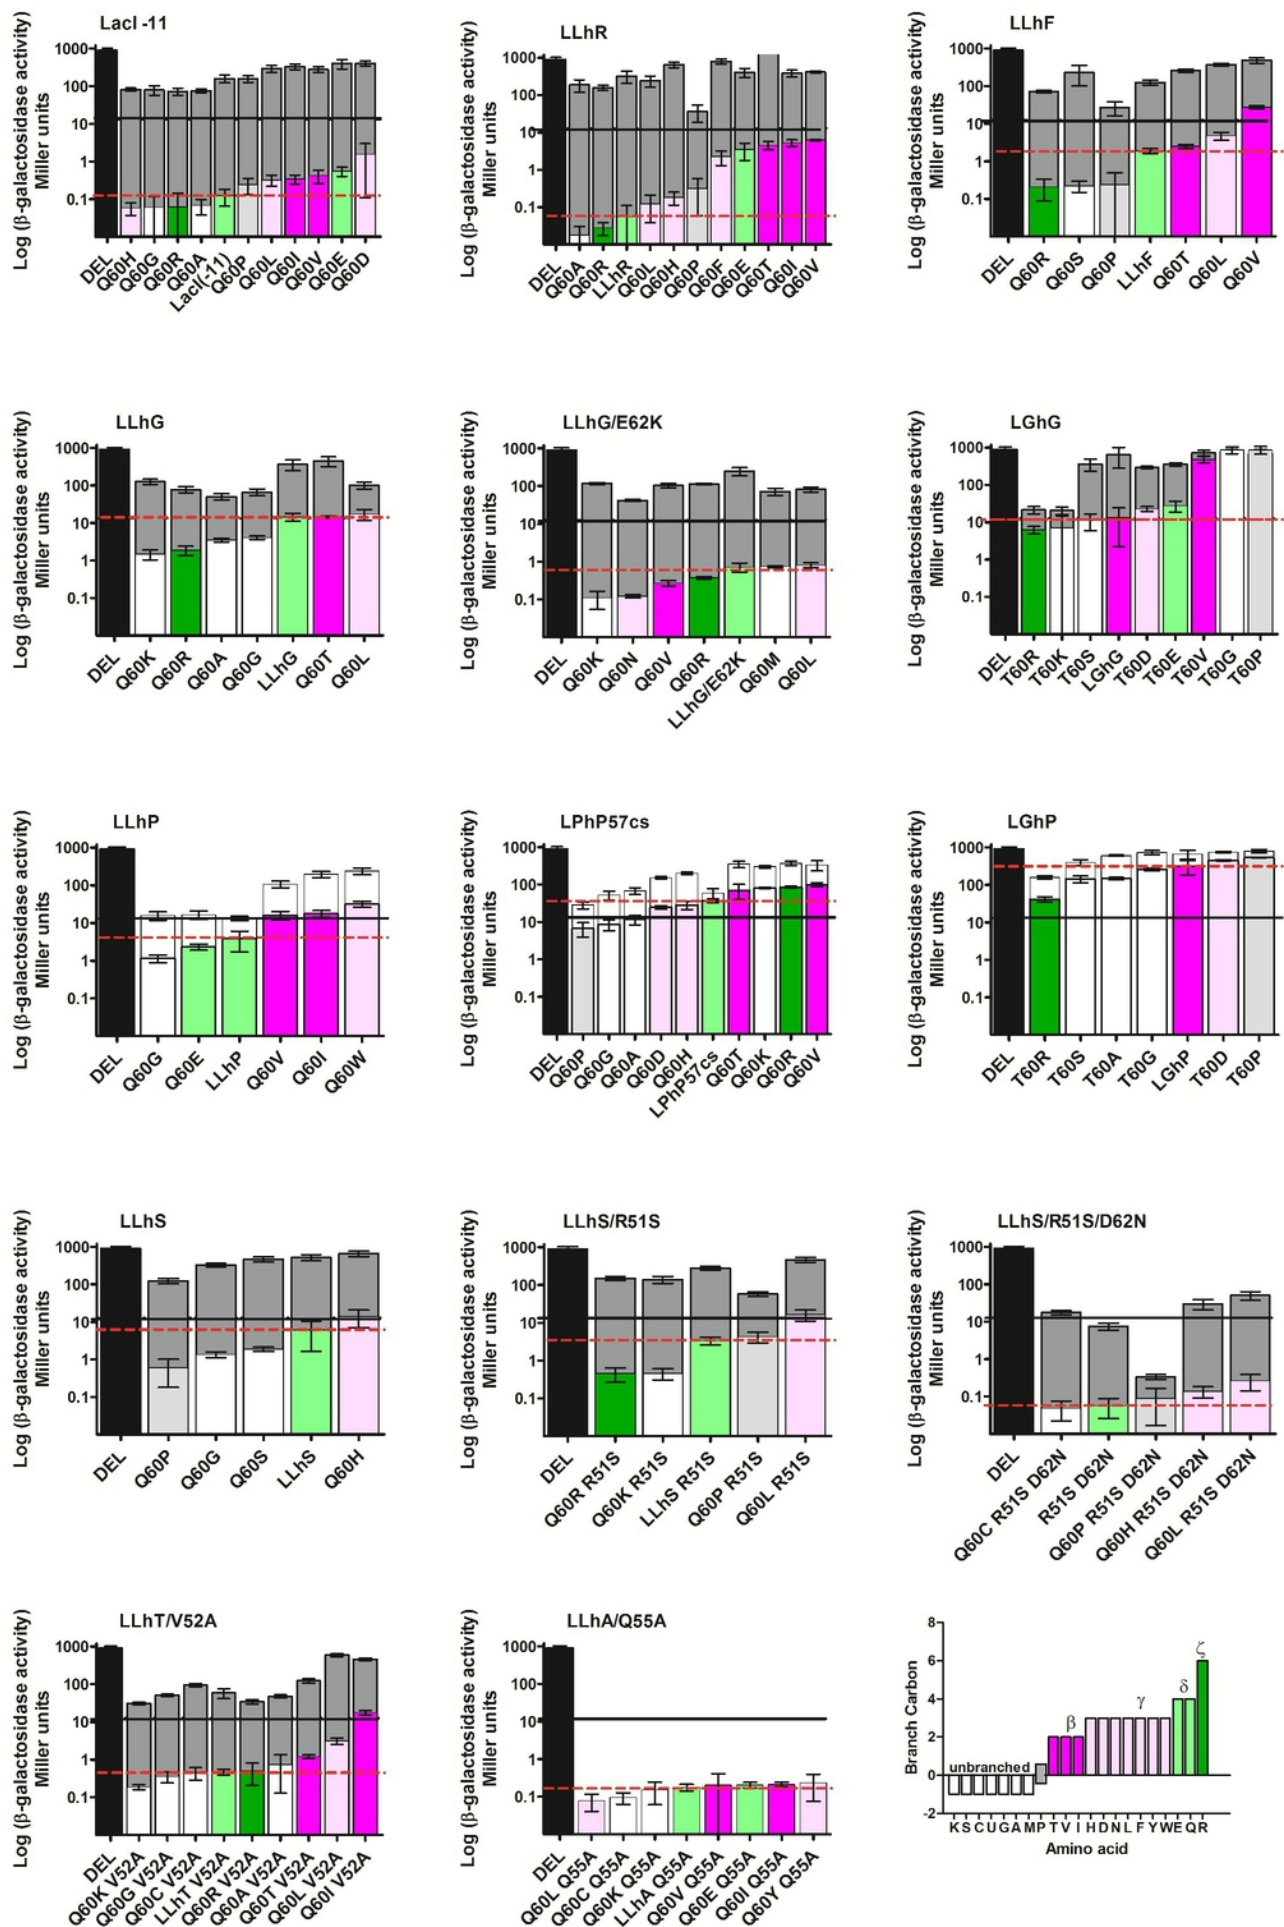

Figure S74: Physicochemical trends: Position 60, Side chain branching



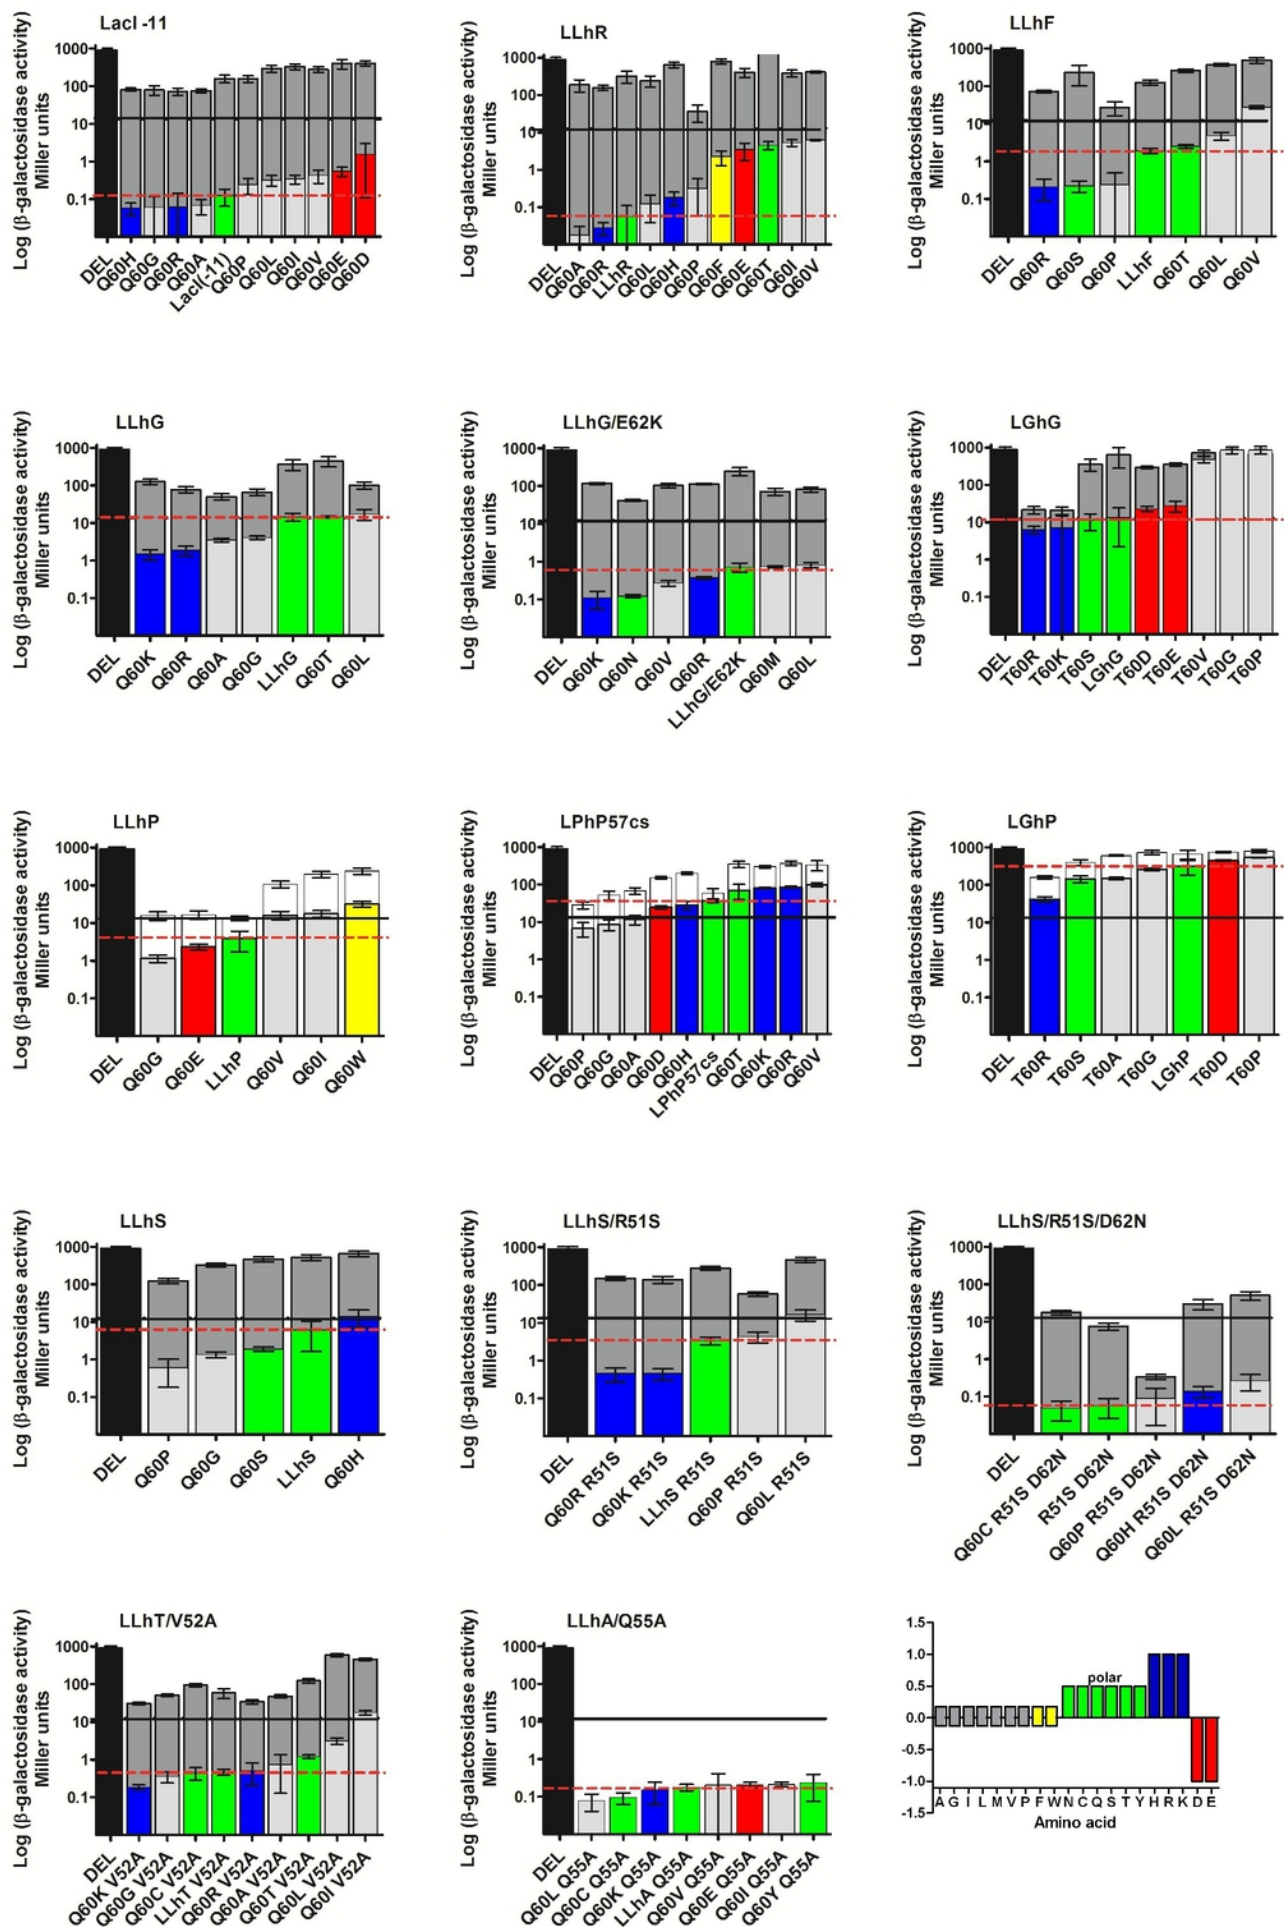

Figure S75: Physicochemical trends: Position 60, Charge/polarity/aromaticity

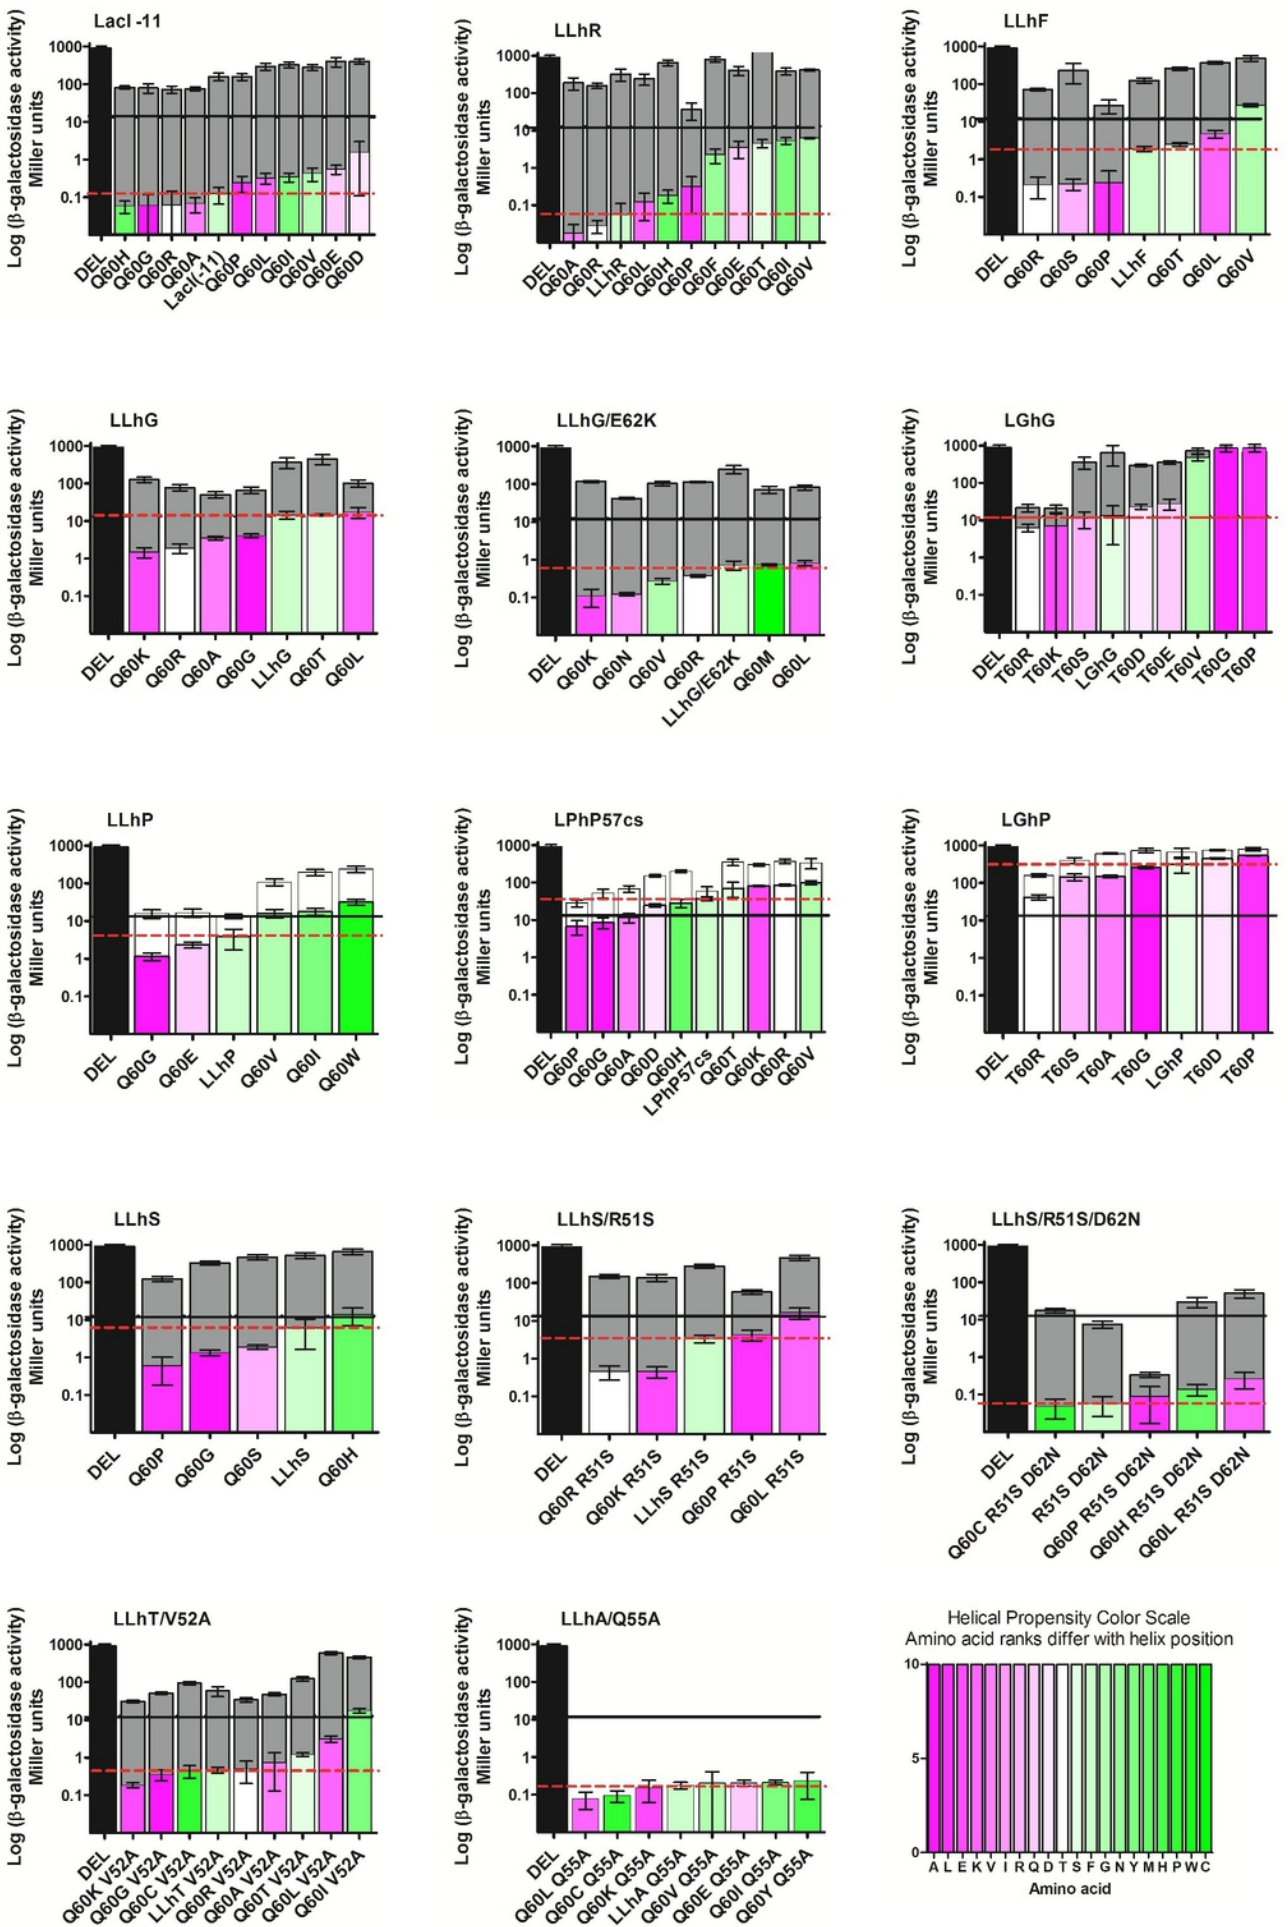

Figure S76: Physicochemical trends: Position 60, Helical propensity ( $C'$  scale)

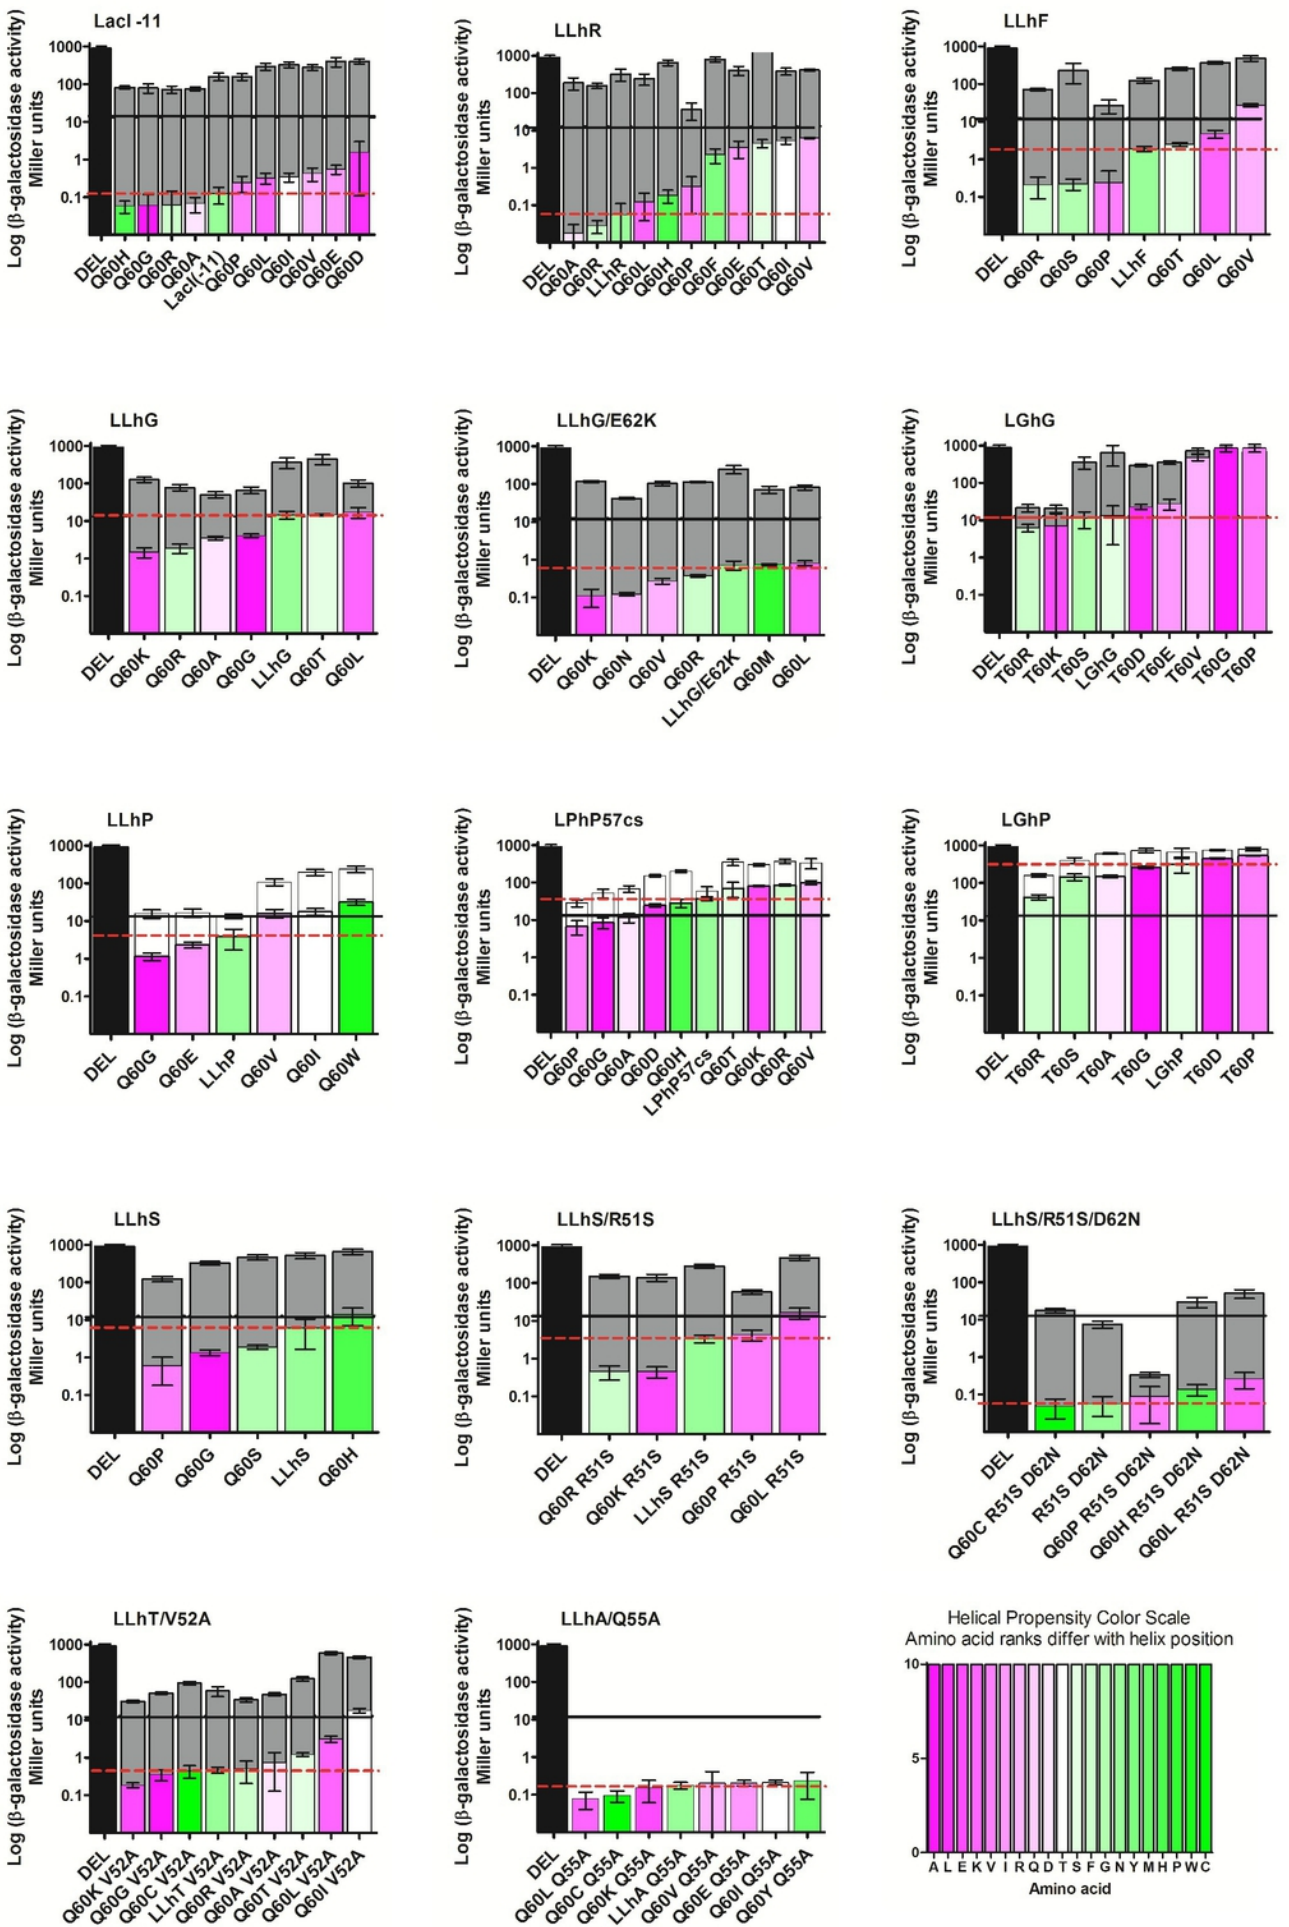

Figure S77: Physicochemical trends: Position 60, Helical propensity ( $C''$  scale)



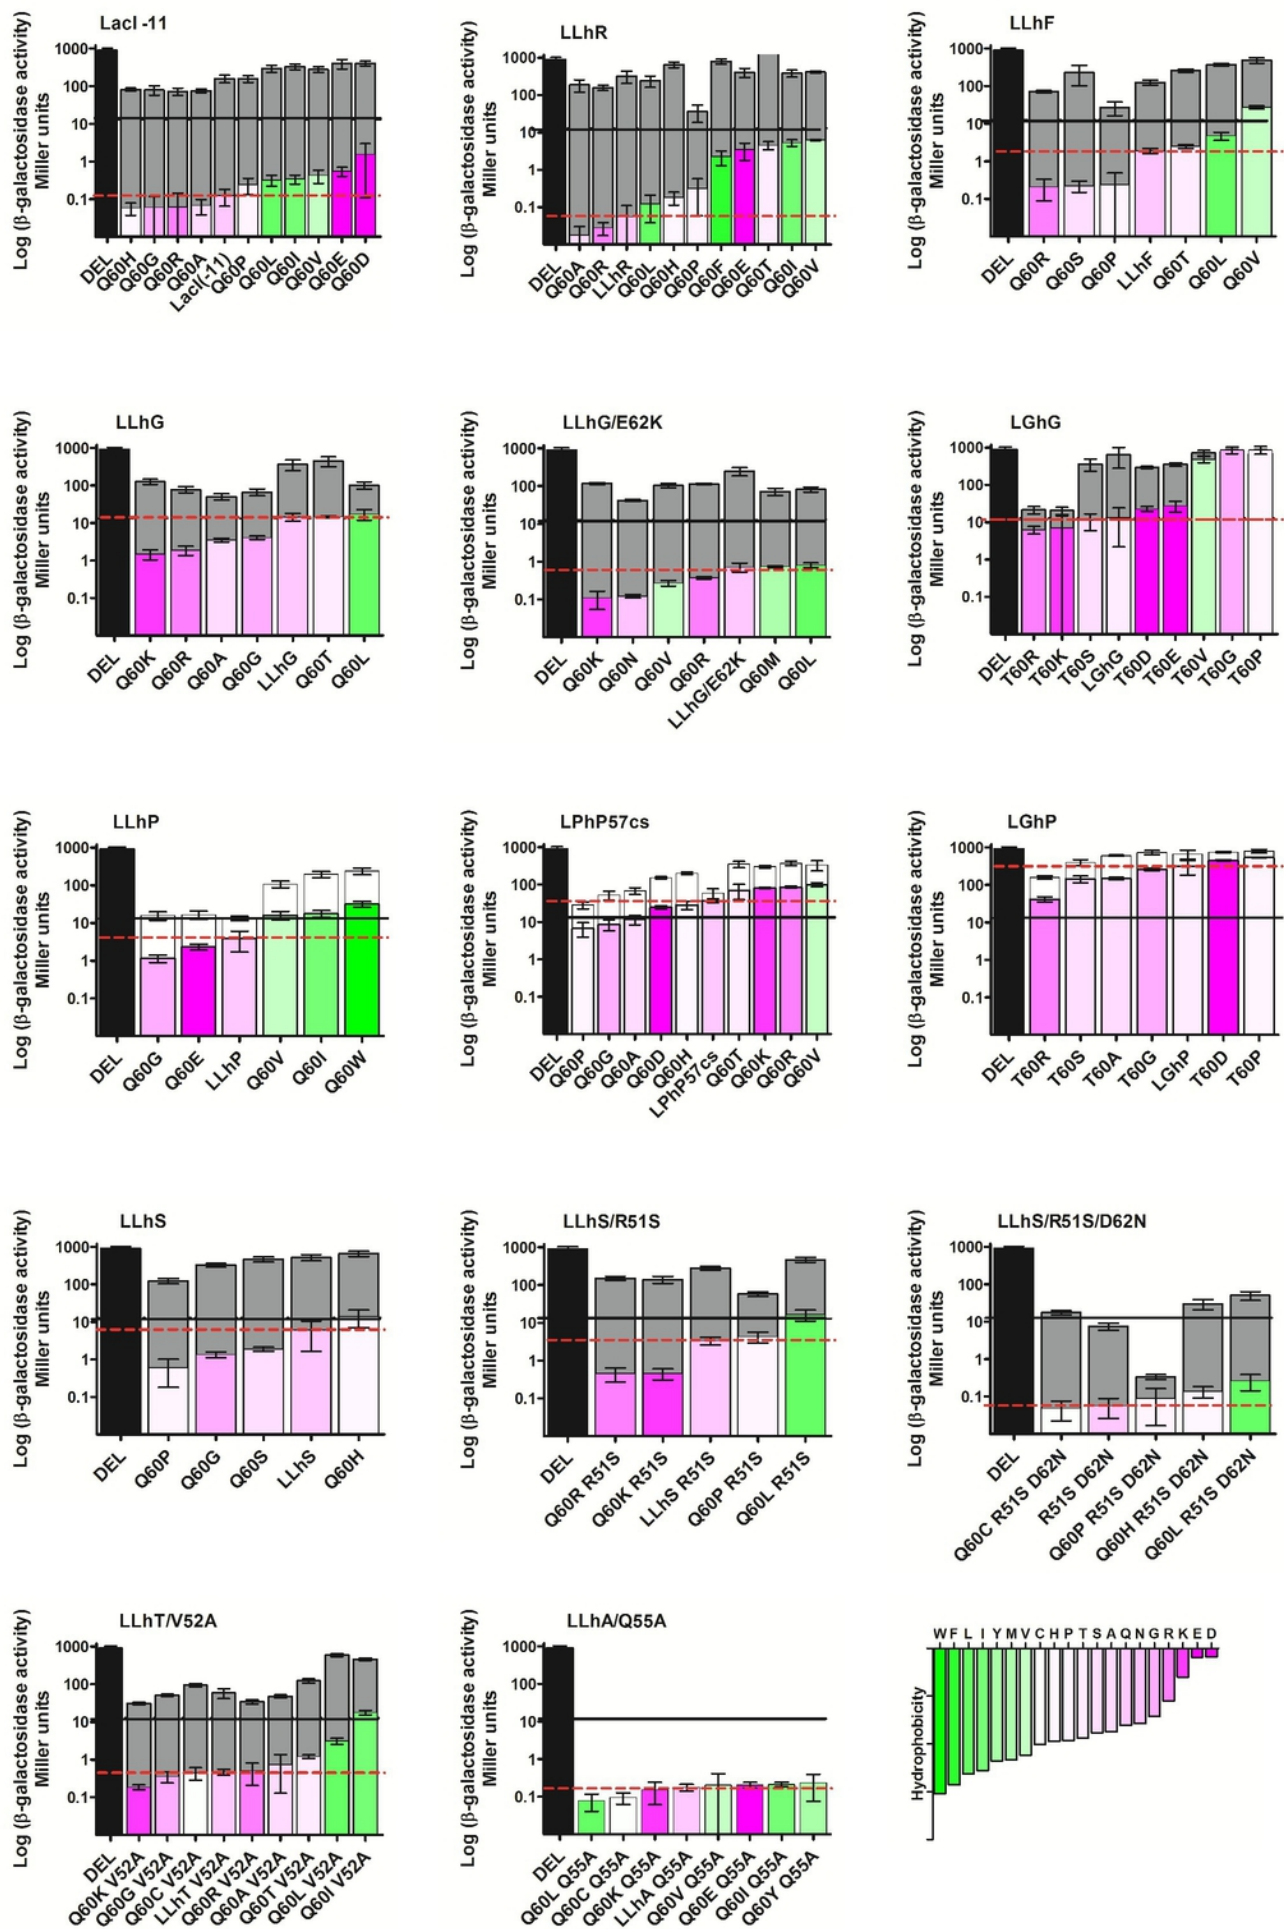

Figure S78: Physicochemical trends: Position 60, Hydrophobicity

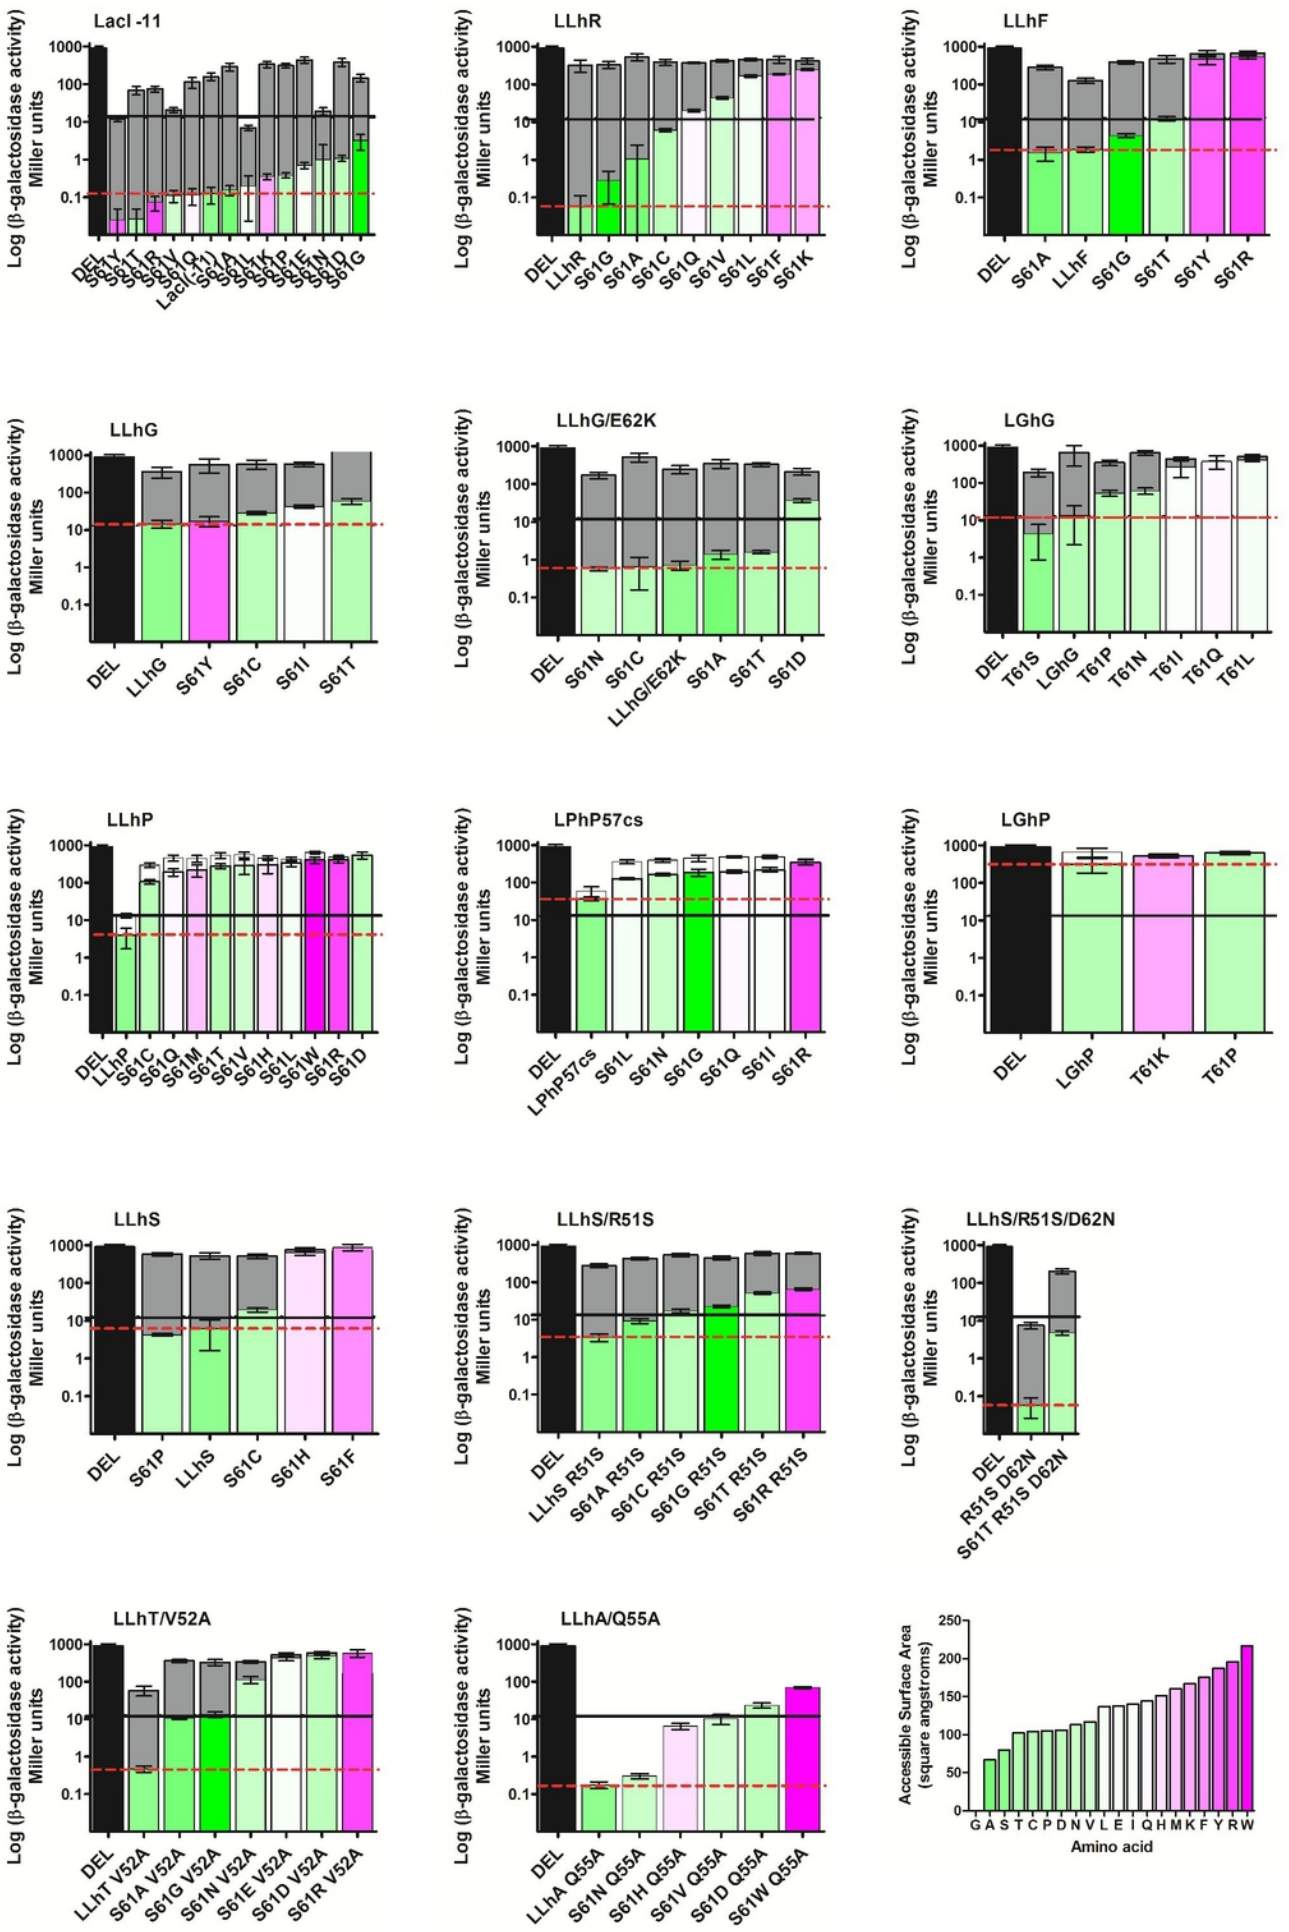

Figure S79: Physicochemical trends: Position 61, Accessible surface area



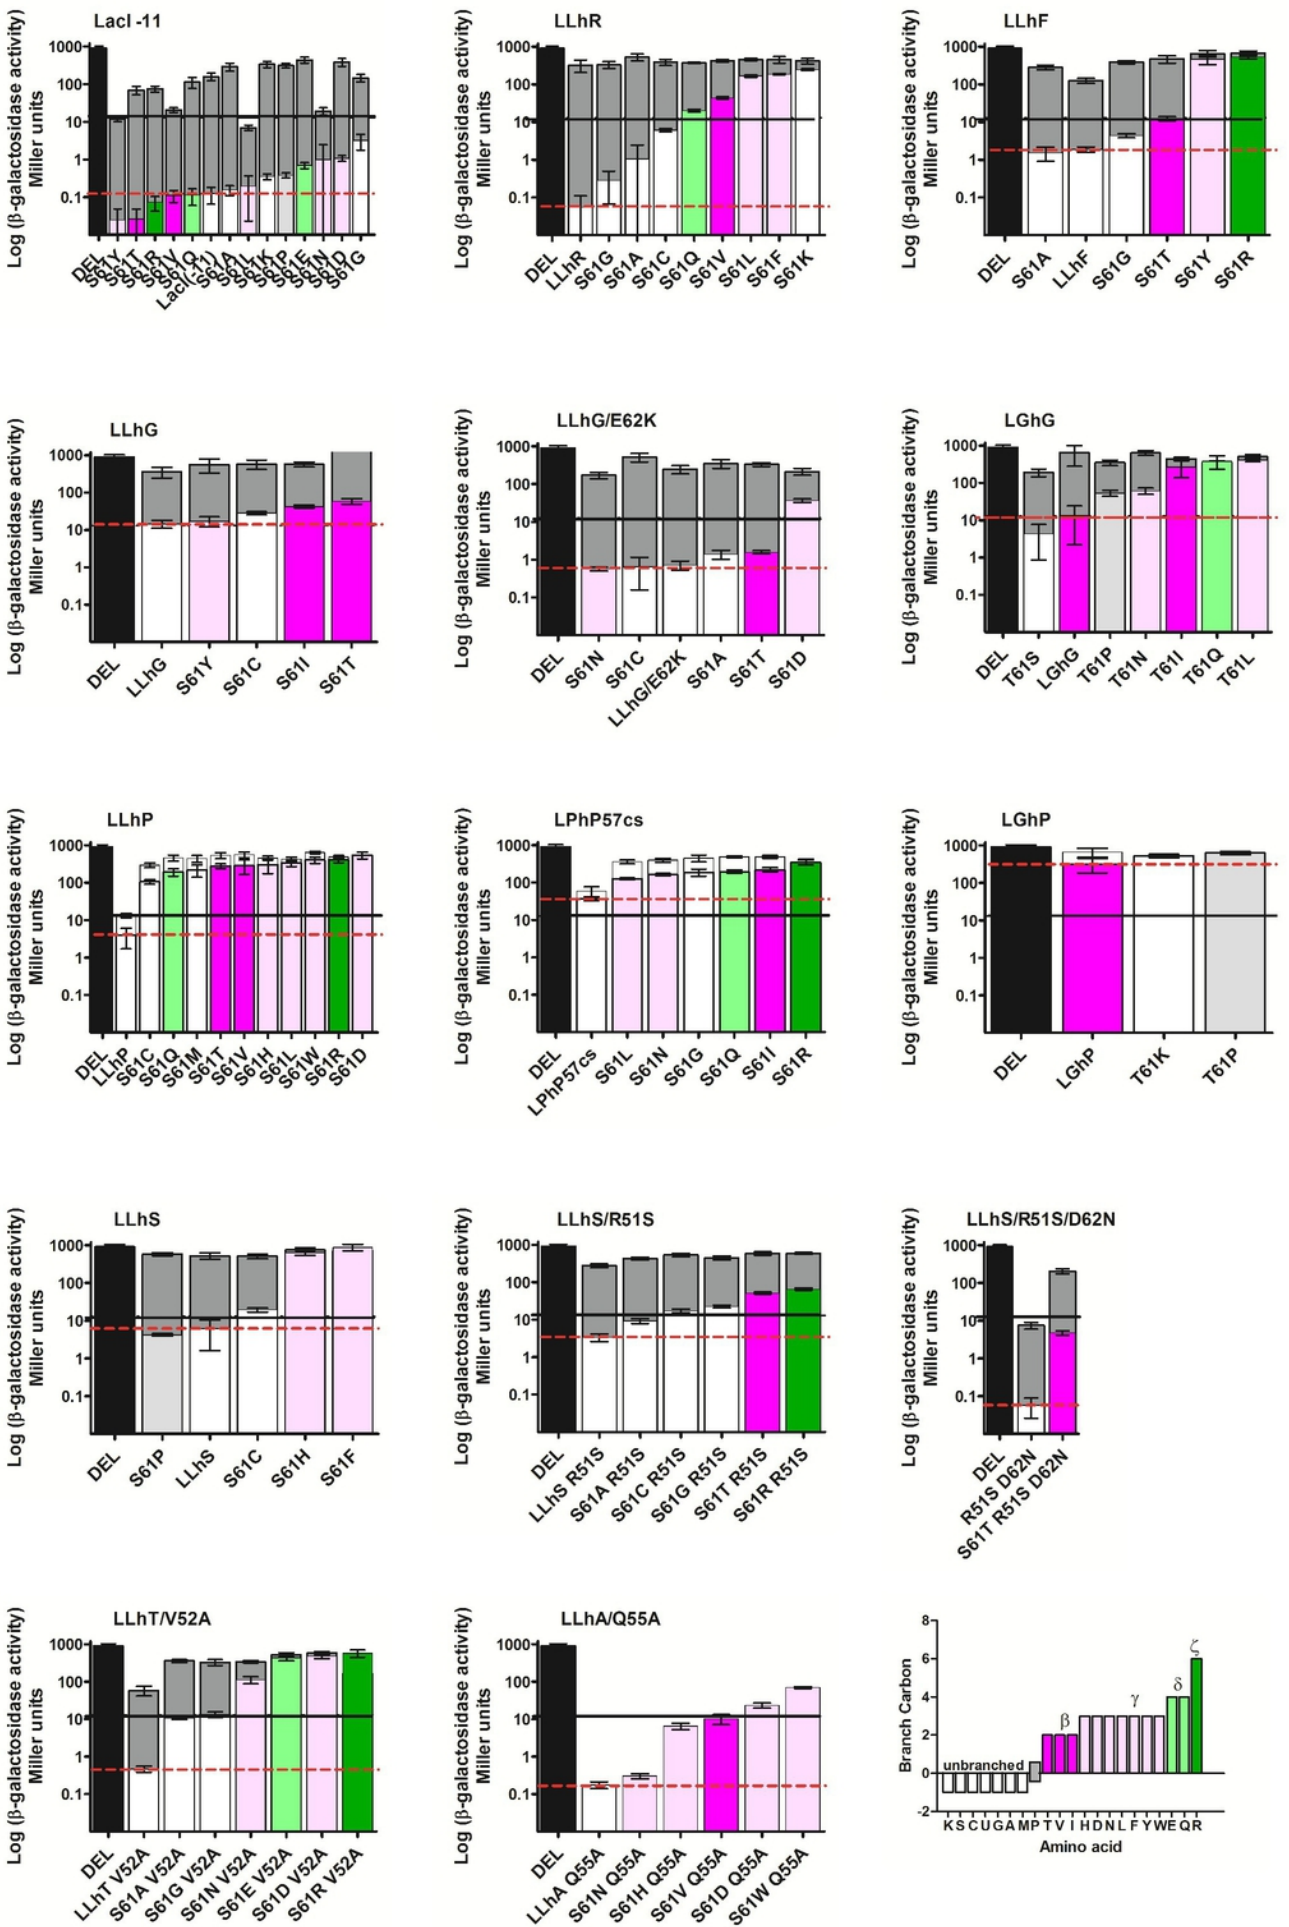

Figure S80: Physicochemical trends: Position 61, Side chain branching

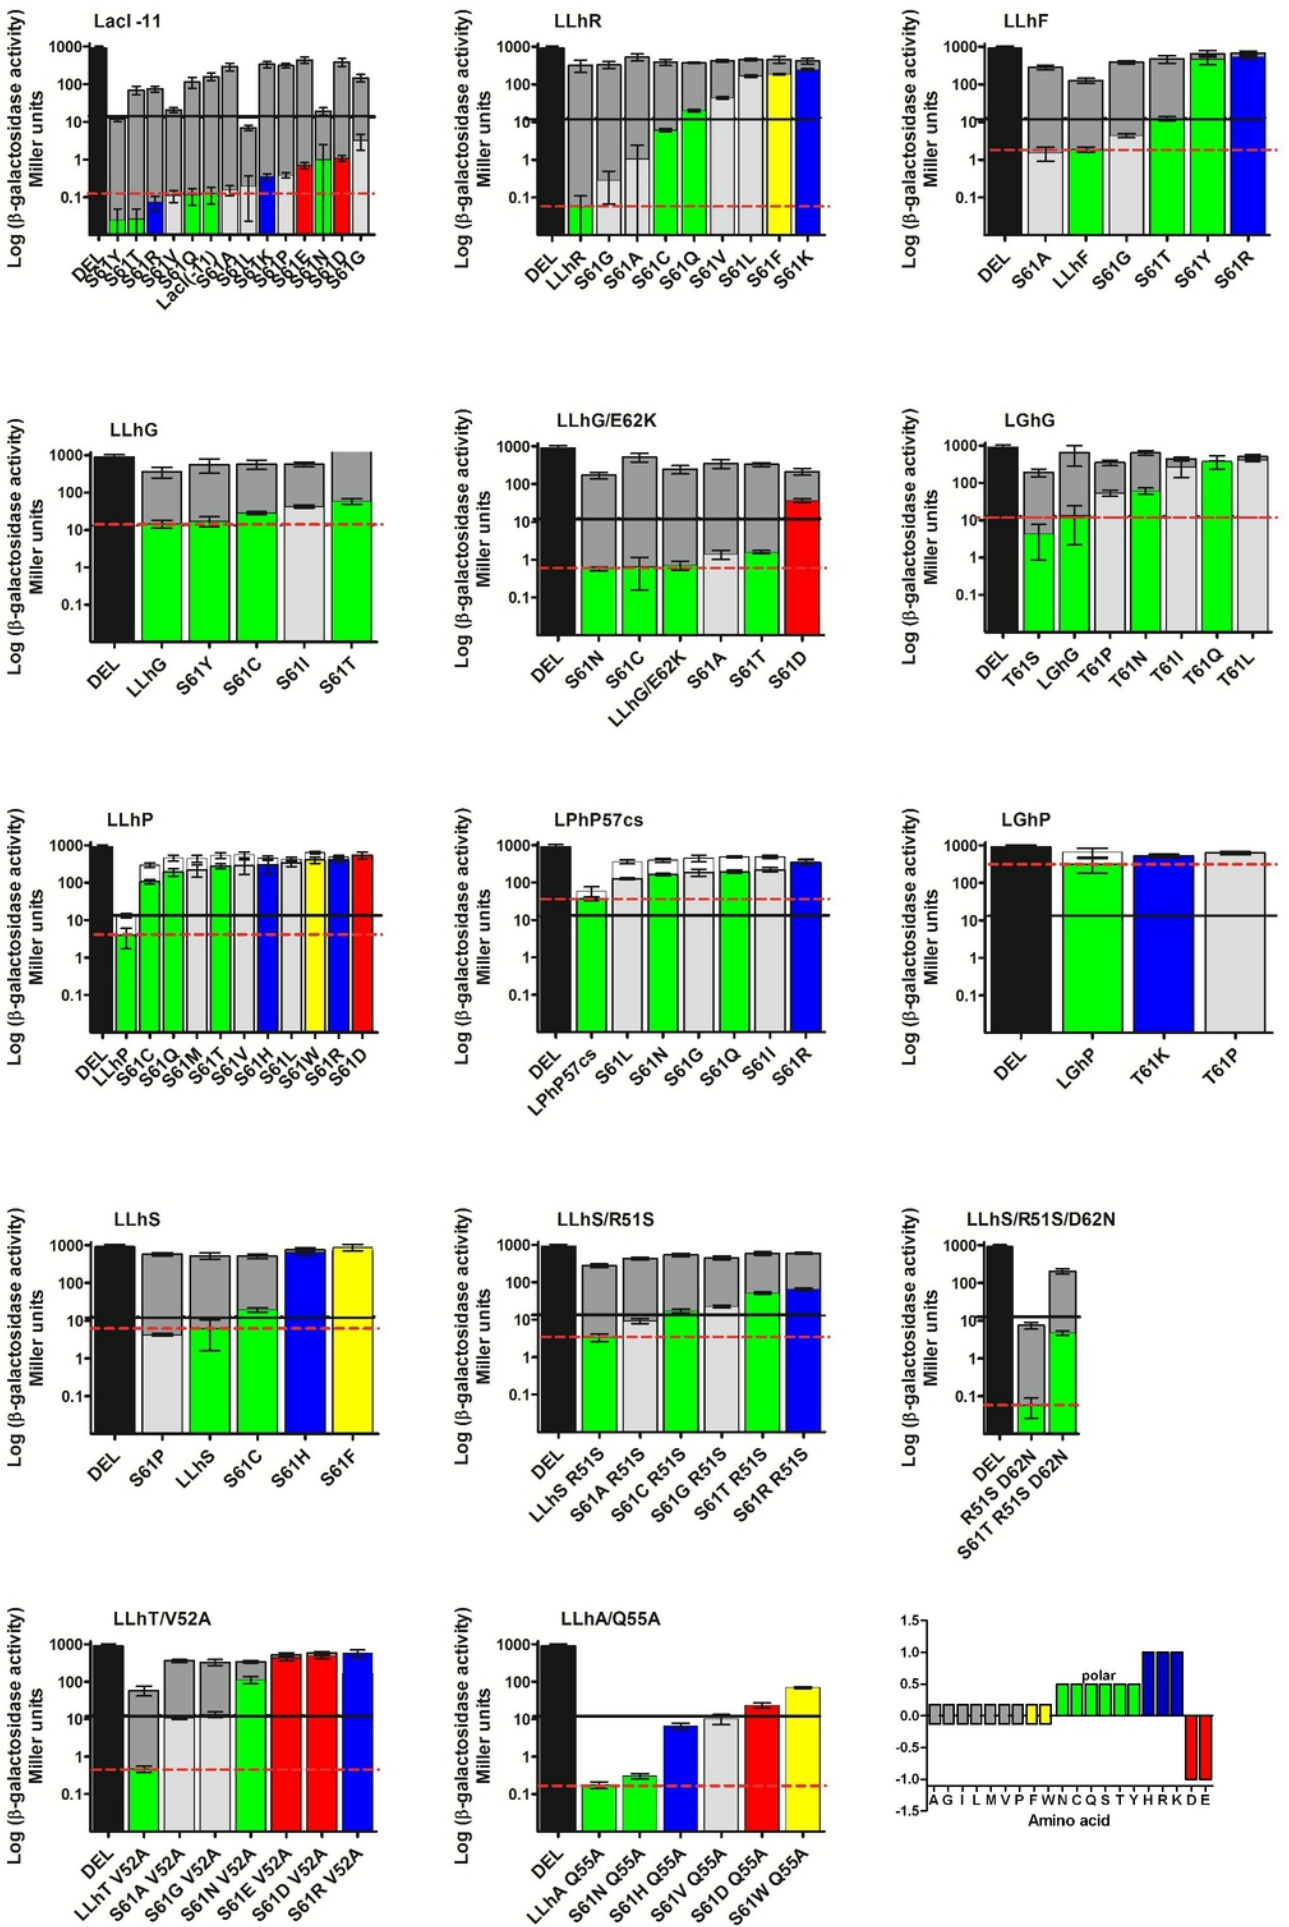

Figure S81: Physicochemical trends: Position 61, Charge/polarity/aromaticity

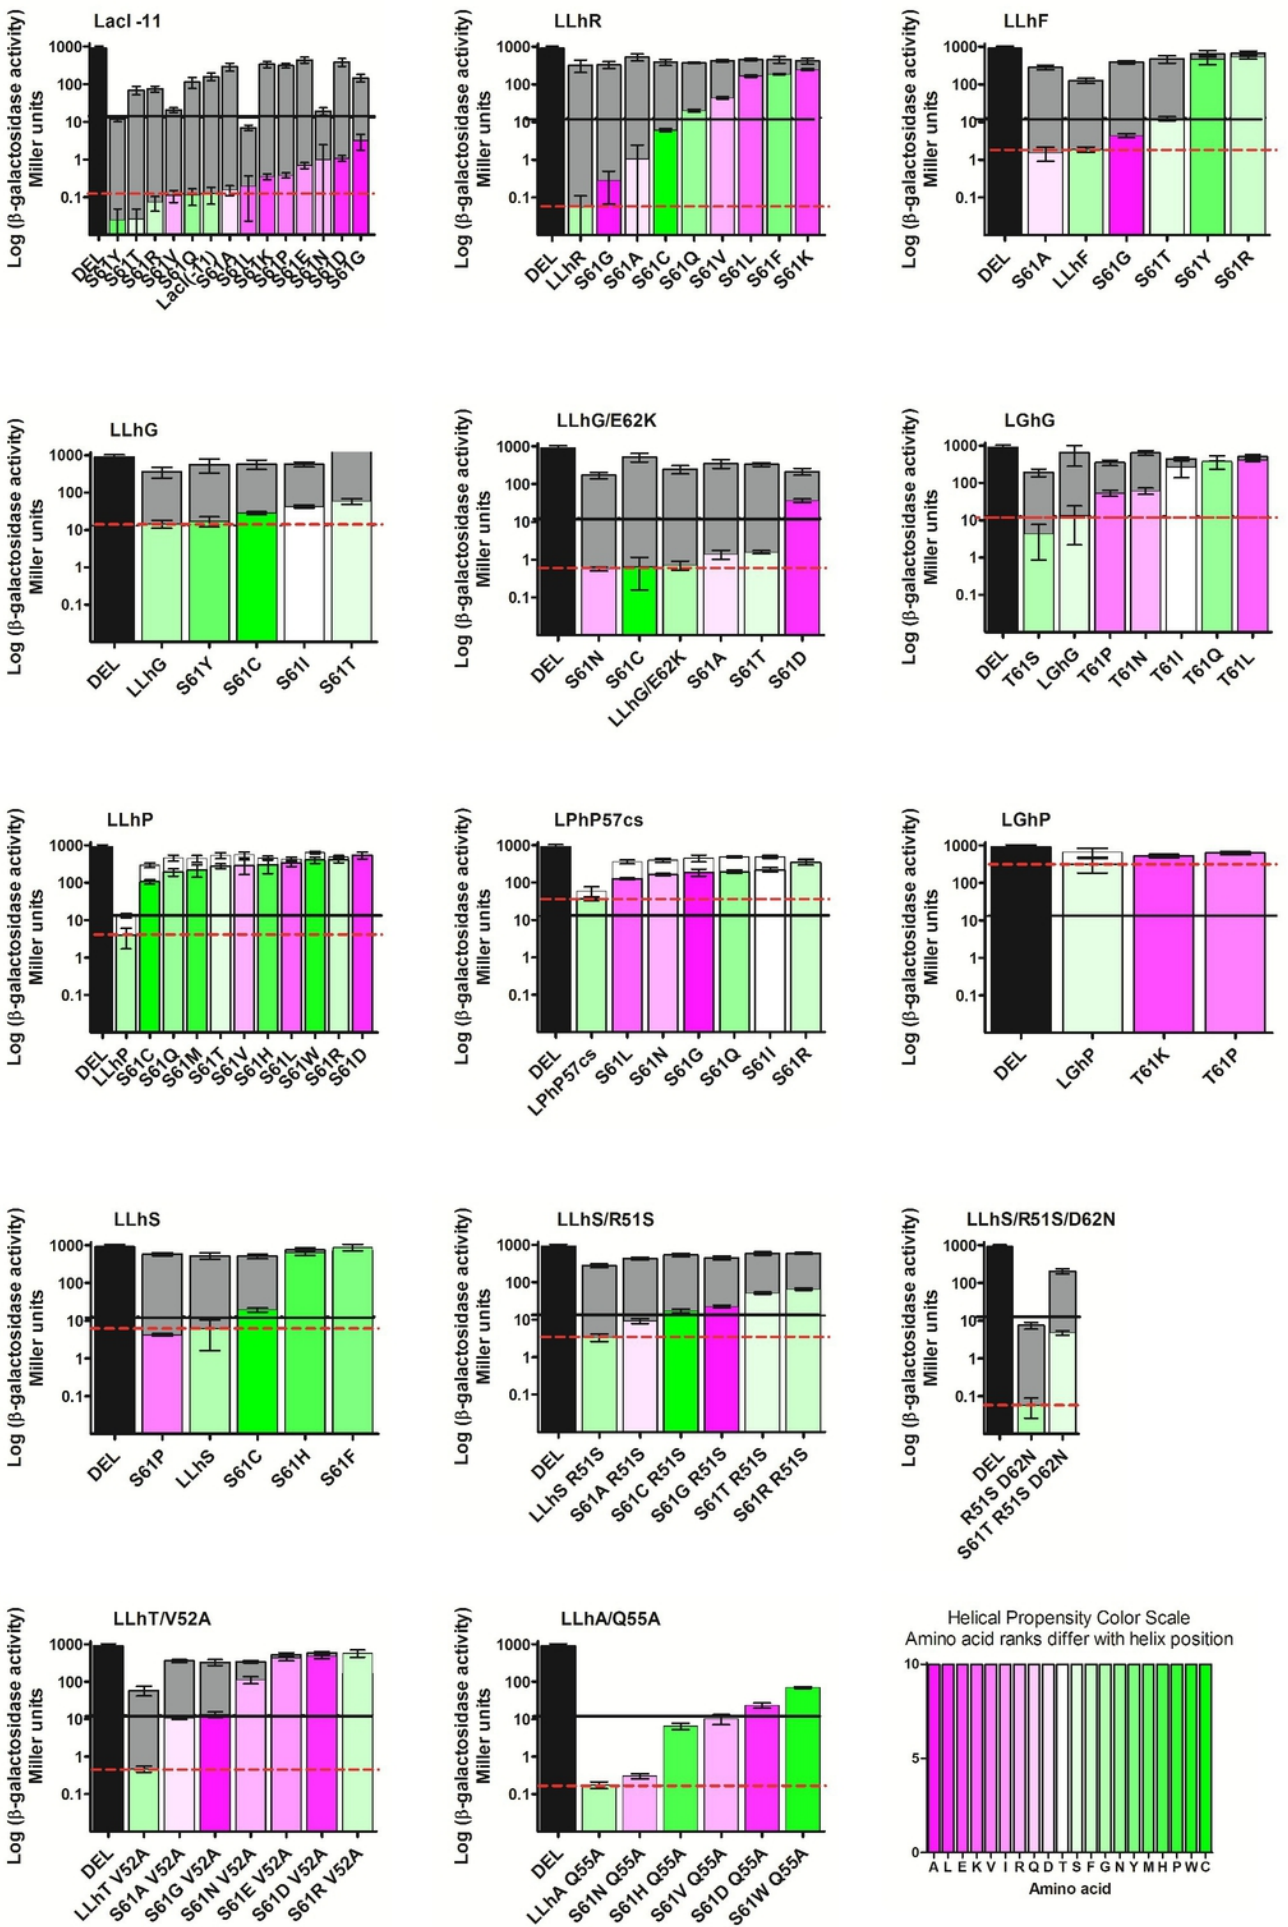

Figure S82: Physicochemical trends: Position 61, Helical propensity ( $C''$  scale)



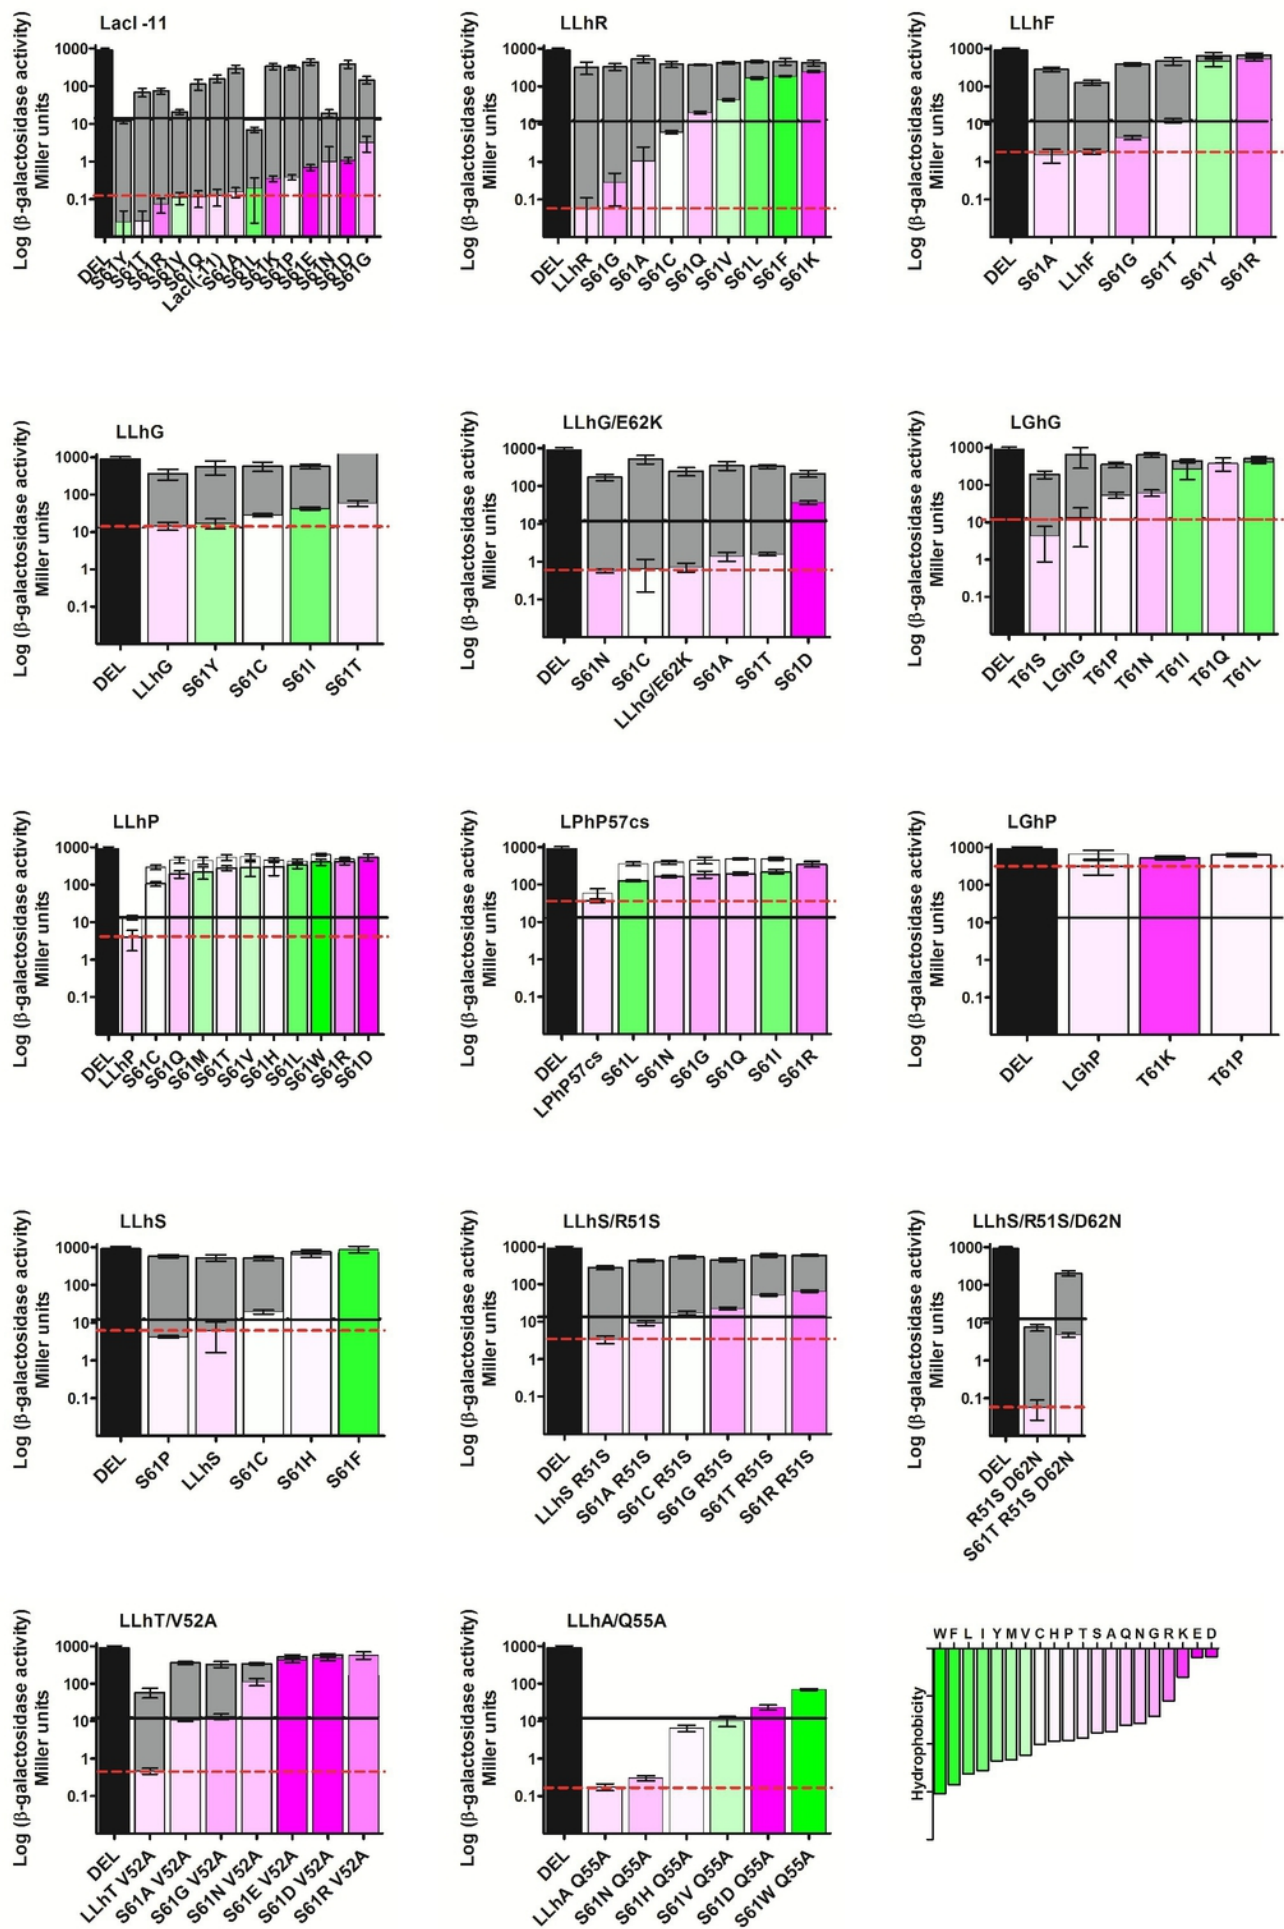

Figure S83: Physicochemical trends: Position 61, Hydrophobicity

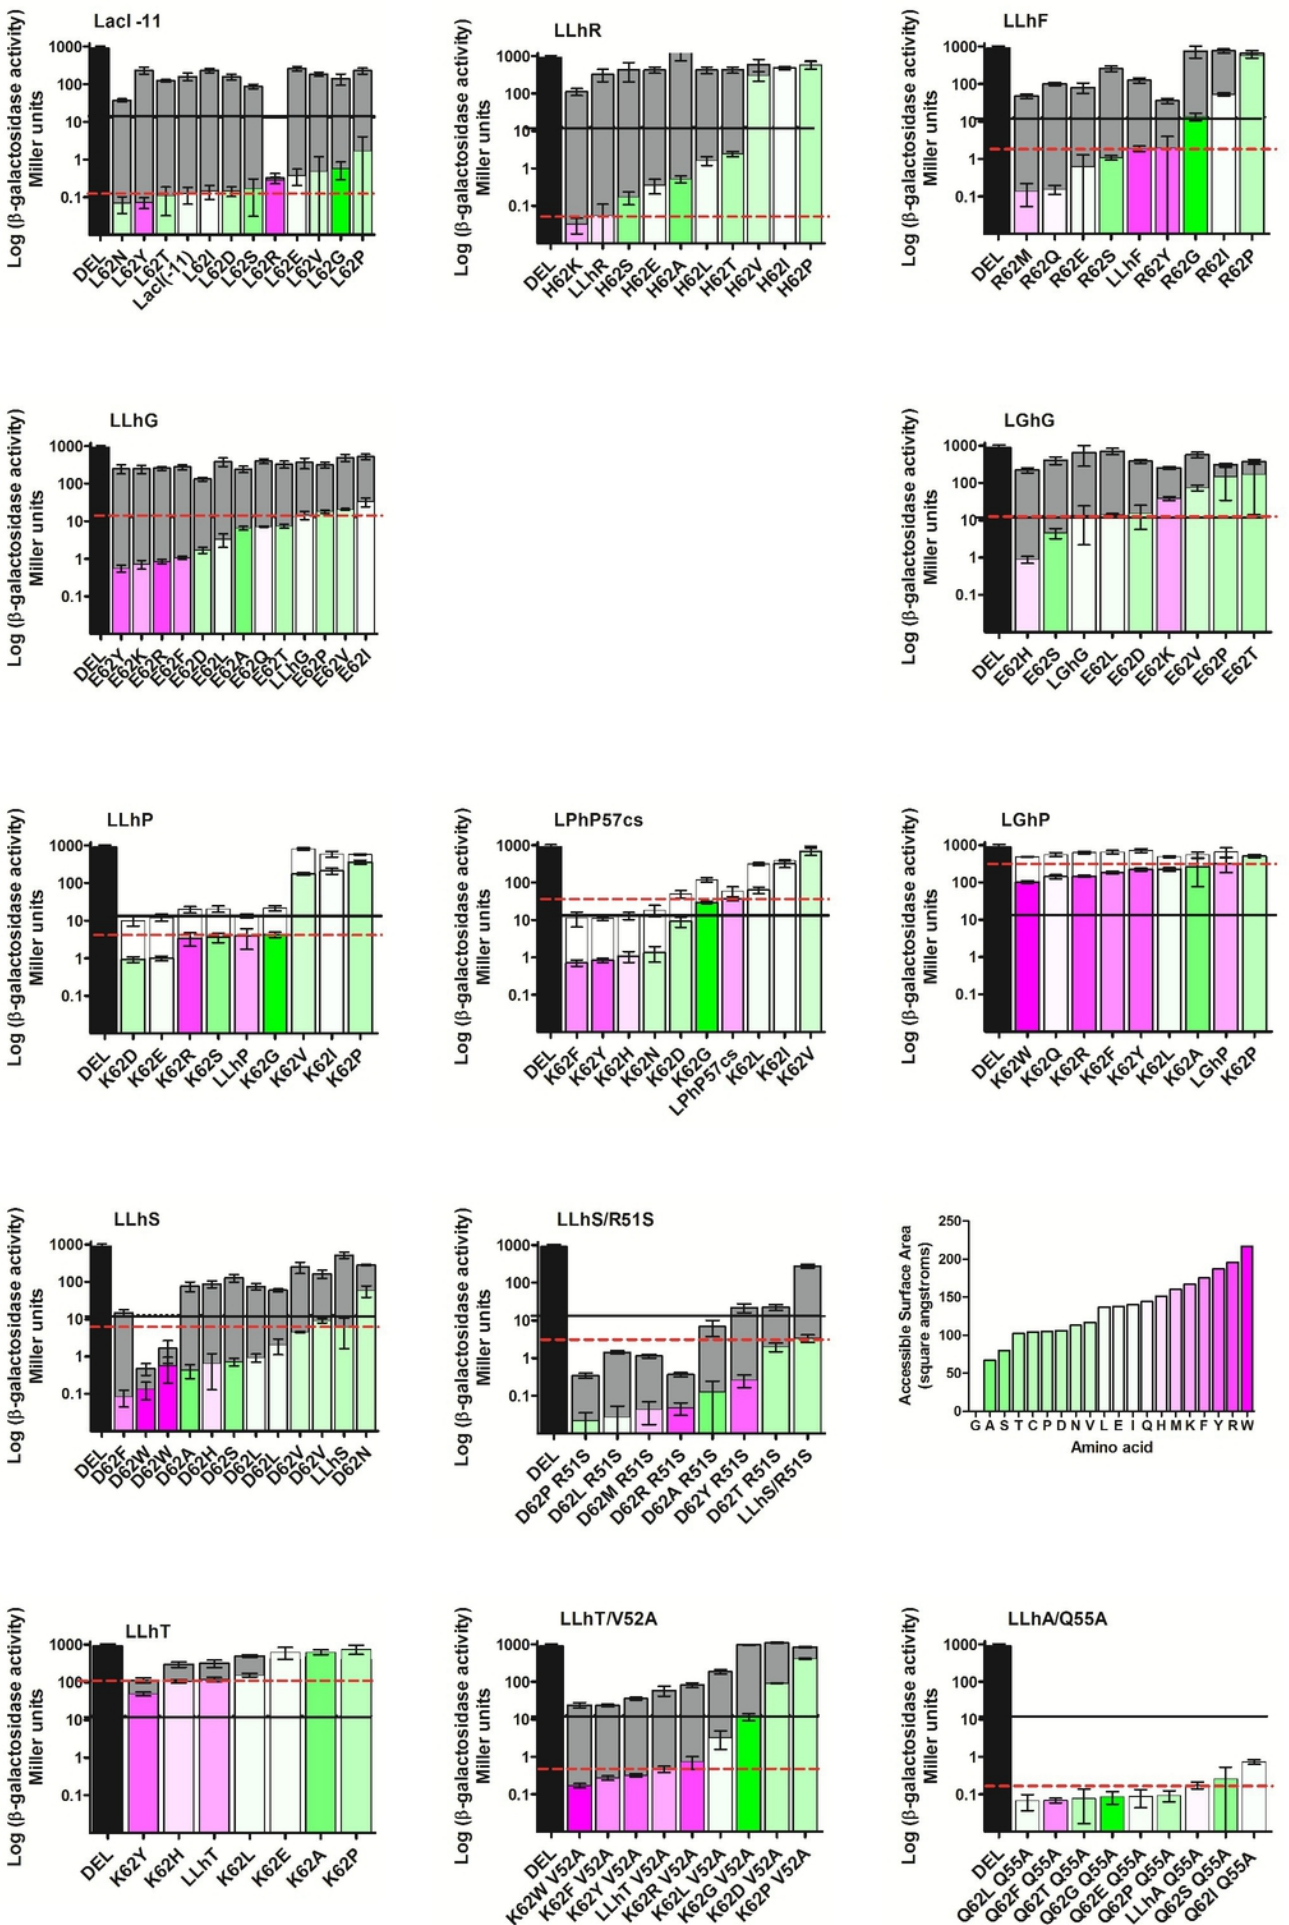

Figure S84: Physicochemical trends: Position 62, Accessible surface area



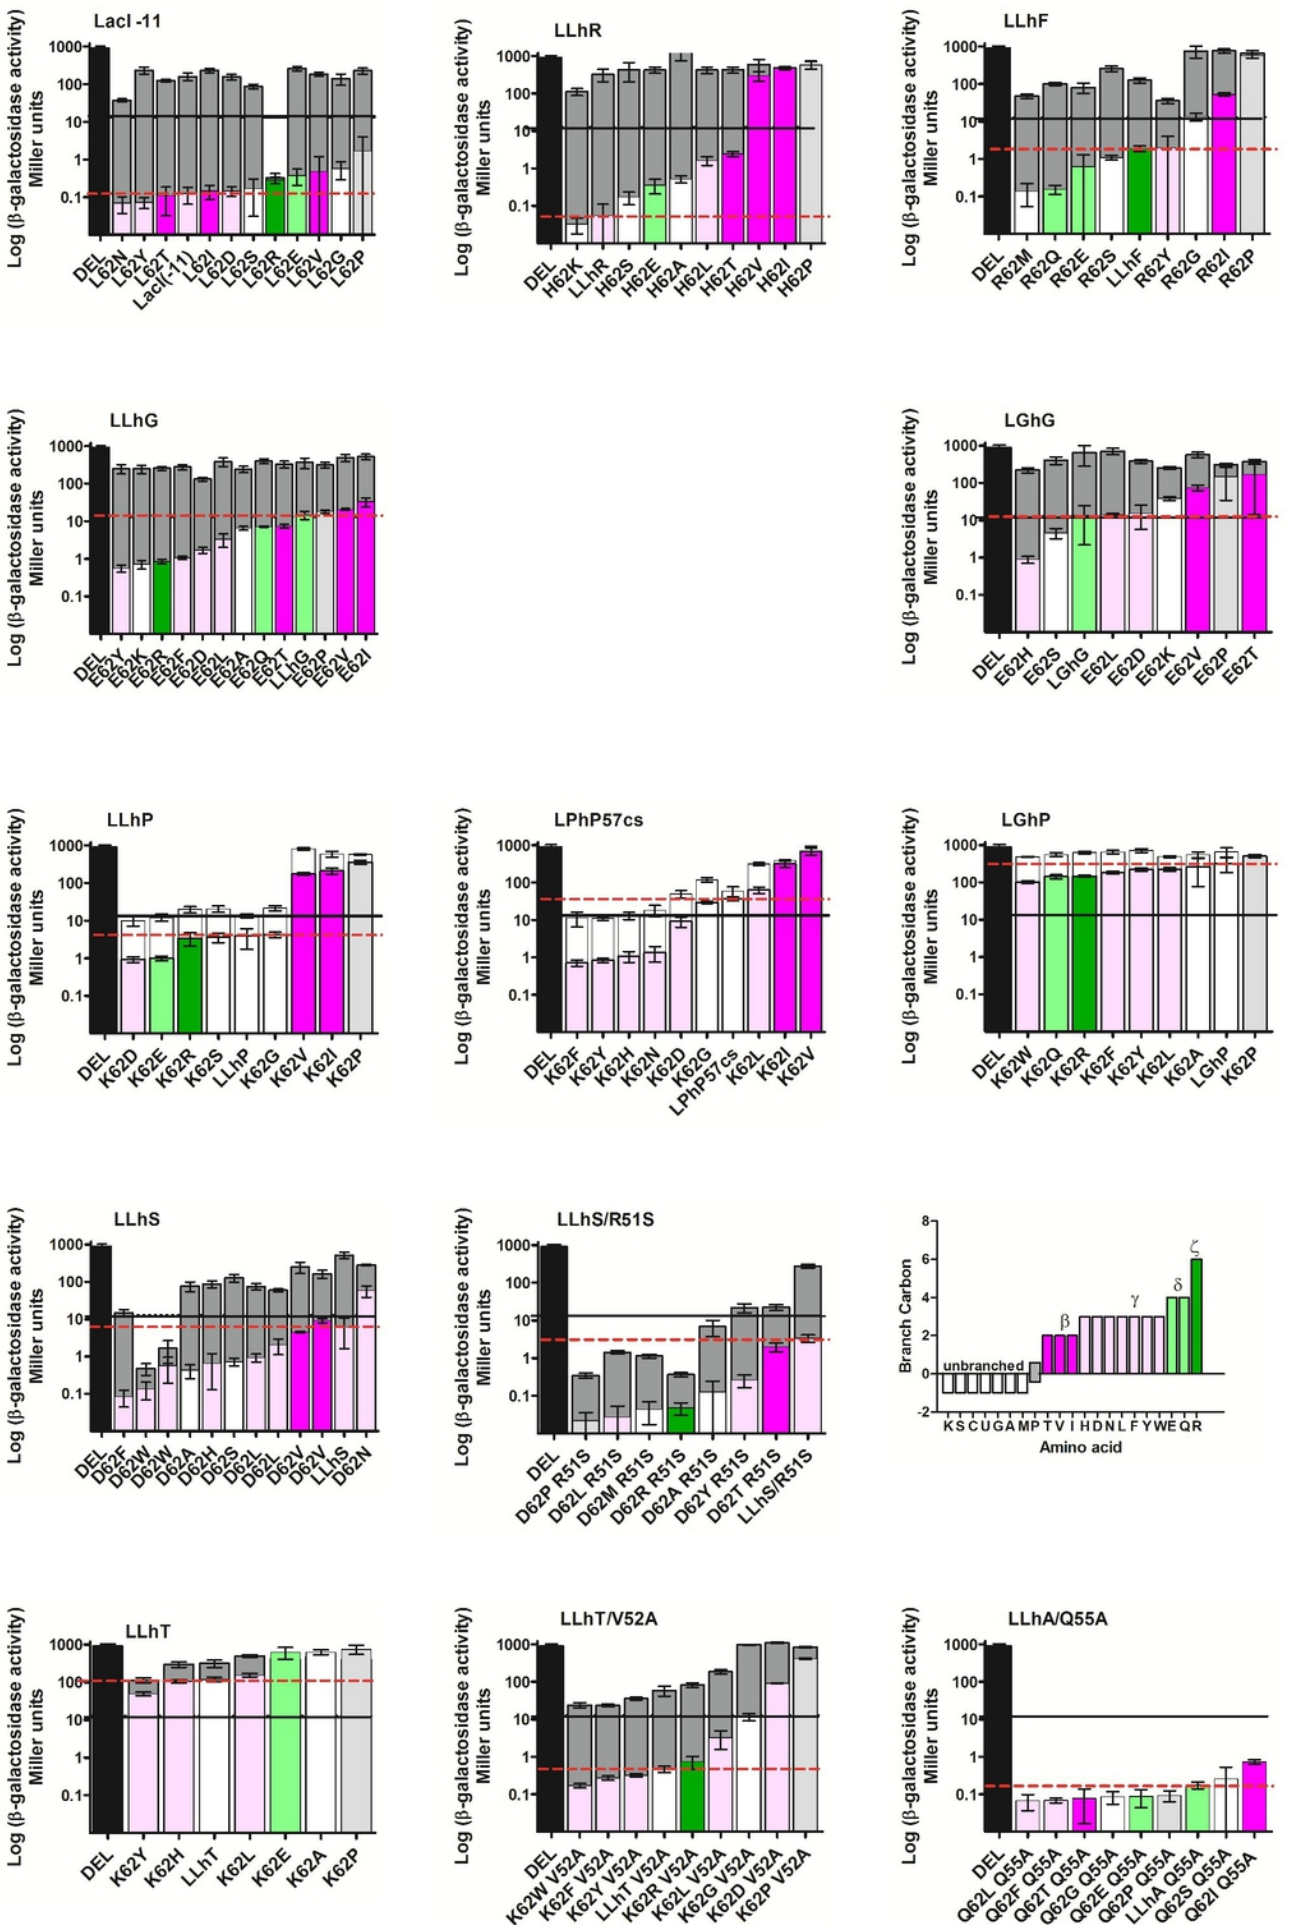

Figure S85: Physicochemical trends: Position 62, Side chain branching

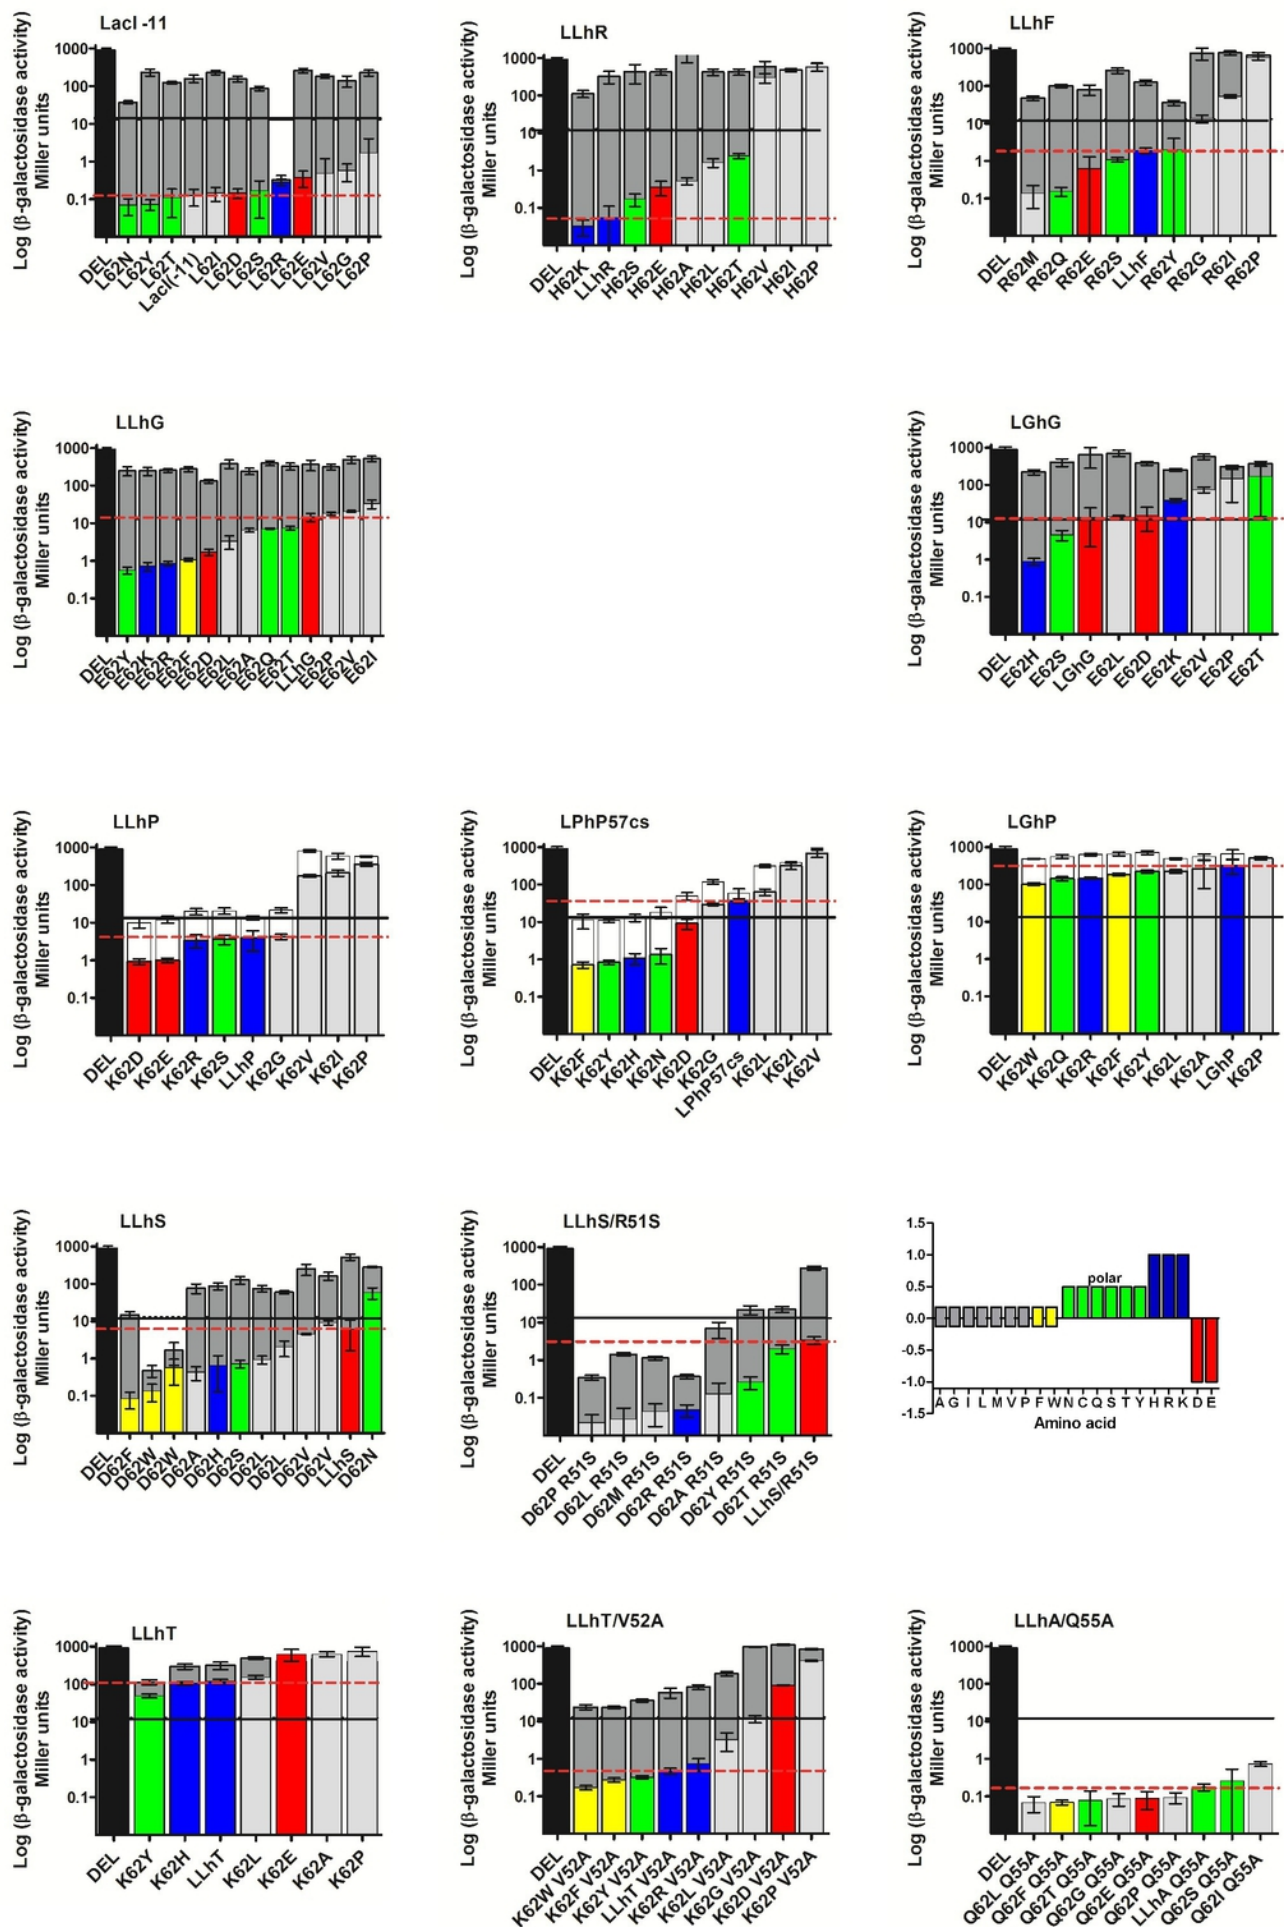

Figure S86: Physicochemical trends: Position 62, Charge/polarity/aromaticity

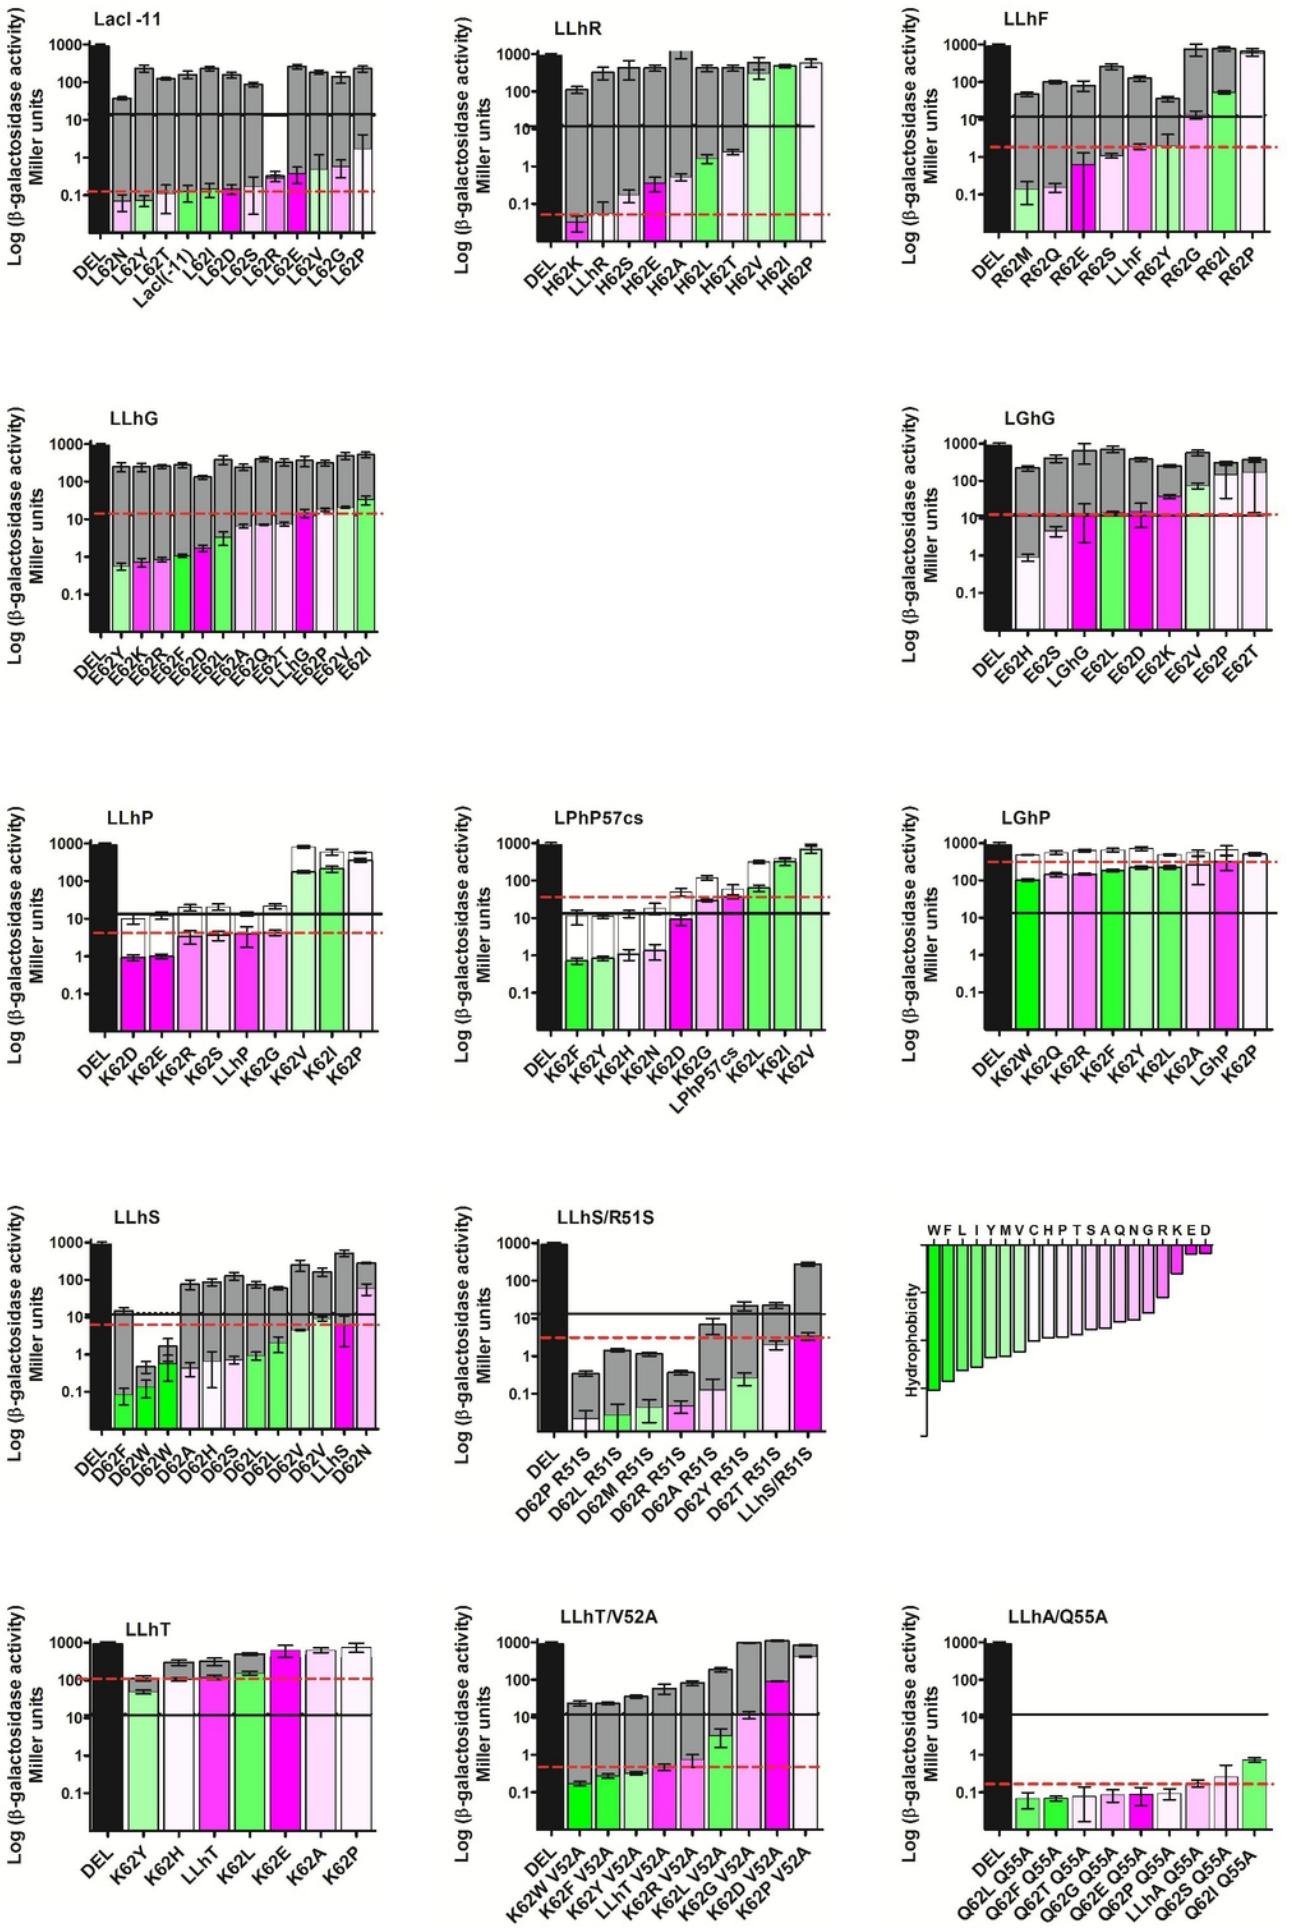

Figure S87: Physicochemical trends: Position 62, Hydrophobicity
